# Supplementary material for: Catalyst- and solvent-free regioselective ring opening of aziridines with amines: application in the gram-scale synthesis of the α,β-diamino propionic derivative, aspergillomarasmine A
Source: Royal Society of Chemistry journal article supplement (doi:10.1039/d3ob00722g), 2023-01-01

**Supporting Information for**

**Catalyst- and solvent-free regioselective ring opening of aziridines  
with amines: application to gram-scale synthesis of  $\alpha$ ,  $\beta$ -diamino  
propionic derivative, aspergillomarasmine A**

Xing Lin, Dajun Zhang, Jing Li and Lei Zhang\*

<sup>a</sup>School of Biology and Biological Engineering, South China University of Technology, Guangzhou  
510006, P. R. China.

E-mail: lzhangce@scut.edu.cn

**Table of Contents**

|                                                                              |     |
|------------------------------------------------------------------------------|-----|
| General information.....                                                     | S2  |
| Preparation of aziridines and the characterization data .....                | S2  |
| Procedure for the ring opening reactions and the characterization data ..... | S3  |
| Crystallographic data .....                                                  | S14 |
| Gram-scale synthesis of AMA and the characterization data.....               | S16 |
| References.....                                                              | S18 |
| Copies of <sup>1</sup> H NMR, <sup>13</sup> C NMR spectra.....               | S19 |

## General information

All starting reagents were purchased from commercial suppliers. Column chromatography was performed using 200-300 mesh silica gel, and ion-exchange chromatography was performed using ion-exchange resin Dowex 1×8. NMR spectra were recorded on Bruker Avance III HD 400 or Bruker Avance III HD 600 instruments and calibrated using residual solvent peaks as internal reference. HRMS were taken on Agilent1290 / Bruker maXis impact instrument.

## Preparation of aziridines and the characterization data

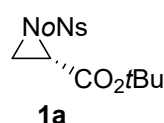

### *tert*-butyl (S)-1-((2-nitrophenyl)sulfonyl)aziridine-2-carboxylate (**1a**)

A suspension of *tert*-butyl *L*-serinate hydrochloride **6** (7.9064 g, 40 mmol), NaHCO<sub>3</sub> (10.0812 g, 120 mmol) and *o*-Nitrobenzenesulfonyl chloride (13.3008 g, 60 mmol) in dichloromethane/water (400 mL/16 mL) was stirred at r.t. for 12 h. After successive addition of another portion *o*-Nitrobenzenesulfonyl chloride (10.6406 g, 48 mmol) and NaOH (9.6000g, 240 mmol), the reaction mixture was stirred at r.t. for additional 30 min. Then the mixture was dried with anhydrous MgSO<sub>4</sub>, and filtered with Celite, of which the filter residue was washed with dichloromethane. The filtrate was evaporated under reduced pressure, and the residue was subjected to column of silica gel to afford compound **1a** (12.2473 g, 93 %, yellowish oil, turning into white solid after standing for long time). <sup>1</sup>H NMR (400 MHz, Chloroform-*d*) δ 8.26 – 8.22 (m, 1H), 7.84 – 7.69 (m, 3H), 3.49 (dd, *J* = 7.1, 4.5 Hz, 1H), 3.00 (d, *J* = 7.1 Hz, 1H), 2.71 (d, *J* = 4.4 Hz, 1H), 1.46 (s, 9H). <sup>13</sup>C NMR (101 MHz, Chloroform-*d*) δ 165.54, 148.46, 134.92, 132.60, 131.82, 131.55, 124.74, 83.42, 38.73, 34.09, 27.93.

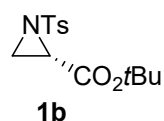

### *tert*-butyl (S)-1-tosylaziridine-2-carboxylate (**1b**)

A solution of *tert*-butyl *L*-serinate hydrochloride **6** (0.3953 g, 2.0 mmol), Et<sub>3</sub>N (0.834 mL, 6.0 mmol) and 4-methylbenzenesulfonyl chloride (0.5720 g, 3.0 mmol) in dichloromethane (20 mL) was stirred at r.t. for 6 h. After successive addition of another portion 4-methylbenzenesulfonyl chloride (0.5720 g, 3.0 mmol) and NaOH (0.4800g, 12.0 mmol), the reaction mixture was stirred at r.t. for additional 1h. Then the mixture was dried with anhydrous MgSO<sub>4</sub>, and filtered with Celite, of which the filter residue was washed with dichloromethane. The filtrate was evaporated under reduced pressure, and the residue was subjected to column of silica gel to afford compound **1b** (0.4087 g, 69 %, white solid). <sup>1</sup>H NMR (600 MHz, Chloroform-*d*) δ 7.87 – 7.81 (m, 2H), 7.37 – 7.30 (m, 2H), 3.21 (dd, *J* = 7.0, 4.2 Hz, 1H), 2.68 (d, *J* = 7.0 Hz, 1H), 2.49 (d, *J* = 4.2 Hz, 1H), 2.44 (s, 3H), 1.41 (s, 9H). <sup>13</sup>C

NMR (151 MHz, Chloroform-*d*)  $\delta$  165.83, 145.15, 134.43, 129.87, 128.27, 83.11, 36.93, 31.96, 27.95, 21.78.

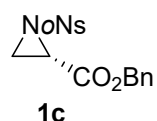

### benzyl (*S*)-1-((2-nitrophenyl)sulfonyl)aziridine-2-carboxylate (**1c**)

A suspension of benzyl *L*-serinate hydrochloride (6.9504 g, 30 mmol), NaHCO<sub>3</sub> (7.5609 g, 90 mmol) and *o*-Nitrobenzenesulfonyl chloride (9.9756 g, 45 mmol) in dichloromethane/water (300 mL/12 mL) was stirred at r.t. for 12 h. After successive addition of another portion *o*-Nitrobenzenesulfonyl chloride (7.9805 g, 36 mmol) and NaOH (7.2000g, 180 mmol), the reaction mixture was stirred at r.t. for additional 30 min. Then the mixture was dried with anhydrous MgSO<sub>4</sub>, and filtered with Celite, of which the filter residue was washed with dichloromethane. The filtrate was evaporated under reduced pressure, and the residue was subjected to column of silica gel to afford compound **1c** (8.8092 g, 81 %, yellowish oil). <sup>1</sup>H NMR (400 MHz, Chloroform-*d*)  $\delta$  8.24 (dt, *J* = 7.3, 1.1 Hz, 1H), 7.85 – 7.68 (m, 3H), 7.40 – 7.30 (m, 5H), 5.22 (s, 2H), 3.65 (dd, *J* = 7.1, 4.4 Hz, 1H), 3.07 (d, *J* = 7.1 Hz, 1H), 2.81 (d, *J* = 4.4 Hz, 1H). <sup>13</sup>C NMR (101 MHz, Chloroform-*d*)  $\delta$  166.54, 148.55, 135.02, 134.87, 132.65, 131.71, 131.69, 128.76, 128.73, 128.48, 124.80, 67.95, 37.91, 34.27.

## Procedure for the ring opening reactions and the characterization data

Method A (for liquid amines):

Mixture of amine (1.2 mmol, 1.2 equiv) and aziridine (1.0 mmol, 1.0 equiv) was stirred at T (°C) for t (h). The residue was directly purified by column chromatography on silica gel to give the corresponding product.

Method B (for solid amines):

Mixture of amine (1.2 mmol, 1.2 equiv) and aziridine (1.0 mmol, 1.0 equiv) was ground with a pestle and mortar at r.t. for 30 min, followed by standing at T (°C) for t (h). The residue was directly purified by column chromatography on silica gel to give the corresponding product.

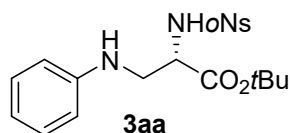

### *tert*-butyl (*S*)-2-((2-nitrophenyl)sulfonamido)-3-(phenylamino)propanoate (**3aa**):

**3aa** was prepared in Method A. Mixture of amine **2a** (0.1176 g, 1.2 equiv) and aziridine **1a** (0.3283 g, 1.0 equiv) was stirred at r.t. for 2 h. The residue was directly purified by column chromatography on silica gel to give **3aa** (0.3826 g, 91 %, yellowish brown solid). <sup>1</sup>H NMR (400 MHz, DMSO-*d*<sub>6</sub>)  $\delta$  8.61 (d, *J* = 9.0 Hz, 1H), 7.98 (dd, *J* = 7.5, 1.8 Hz, 1H), 7.94 (dd, *J* = 7.6, 1.6 Hz, 1H), 7.85 – 7.73 (m, 2H), 7.09 – 7.00 (m, 2H), 6.60 – 6.50 (m, 3H), 4.06 (ddd, *J* = 9.0, 6.9, 5.5 Hz, 1H), 3.43 (dd, *J* = 13.9, 5.6 Hz, 1H), 3.36 (dd, *J* = 13.9, 7.0 Hz, 1H), 1.19 (s, 9H). <sup>13</sup>C NMR (101 MHz, DMSO-*d*<sub>6</sub>)  $\delta$  168.87, 147.53, 147.32, 134.07, 133.14, 132.61, 129.90, 128.97, 124.34, 116.39, 112.19, 81.31,

55.79, 45.12, 27.30. HRMS: calculated for  $C_{19}H_{24}N_3O_6S^+$   $[M+H]^+$  422.1380, found 422.1389. The regioselectivity can be confirmed by the  $^1H$  NMR. <sup>1</sup>

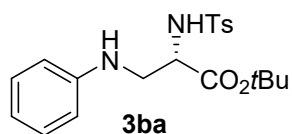

***tert*-butyl (S)-2-((4-methylphenyl)sulfonamido)-3-(phenylamino)propanoate (3ba)**

**3ba** was prepared in Method A. Mixture of amine **2a** (0.1176 g, 1.2 equiv) and aziridine **1b** (0.2974 g, 1.0 equiv) was stirred at r.t. for 2 h. The residue was directly purified by column chromatography on silica gel to give **3ba** (0.1356 g, 35 %, white solid).  $^1H$  NMR (600 MHz, Chloroform-*d*)  $\delta$  7.66 – 7.62 (m, 2H), 7.18 (d,  $J$  = 8.0 Hz, 2H), 7.08 (dd,  $J$  = 8.6, 7.3 Hz, 2H), 6.66 (tt,  $J$  = 7.3, 1.1 Hz, 1H), 6.52 (dt,  $J$  = 7.0, 1.1 Hz, 2H), 5.50 (d,  $J$  = 8.2 Hz, 1H), 3.90 (ddd,  $J$  = 8.1, 6.3, 4.5 Hz, 1H), 3.41 (dd,  $J$  = 13.2, 4.6 Hz, 1H), 3.30 (dd,  $J$  = 13.2, 6.3 Hz, 1H), 2.31 (s, 3H), 1.20 (s, 9H).  $^{13}C$  NMR (151 MHz, Chloroform-*d*)  $\delta$  169.34, 147.12, 143.90, 136.50, 129.83, 129.35, 127.41, 118.42, 113.66, 83.48, 55.98, 46.77, 27.79, 21.58. HRMS: calculated for  $C_{20}H_{26}N_2NaO_4S^+$   $[M+Na]^+$  413.1505, found 413.1519.

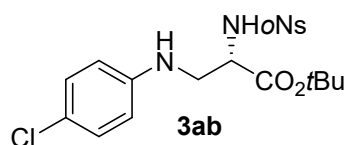

***tert*-butyl (S)-3-((4-chlorophenyl)amino)-2-((2-nitrophenyl)sulfonamido)propanoate (3ab):**

**3ab** was prepared in Method B. Mixture of amine **2b** (0.1531 g, 1.2 equiv) and aziridine **1a** (0.3283 g, 1.0 equiv) was ground with a pestle and mortar at r.t. for 30 min, followed by standing at r.t. for 2 h. The residue was directly purified by column chromatography on silica gel to give **3ab** (0.3870 g, 85 %, reddish brown oil).  $^1H$  NMR (400 MHz, Chloroform-*d*)  $\delta$  8.03 (dd,  $J$  = 7.4, 1.9 Hz, 1H), 7.89 (dd,  $J$  = 7.3, 1.9 Hz, 1H), 7.76 – 7.63 (m, 2H), 7.17 – 7.03 (m, 2H), 6.62 – 6.51 (m, 2H), 6.40 (d,  $J$  = 8.0 Hz, 1H), 4.22 (ddd,  $J$  = 8.0, 6.5, 4.6 Hz, 1H), 3.57 (dd,  $J$  = 13.7, 4.7 Hz, 1H), 3.45 (dd,  $J$  = 13.6, 6.5 Hz, 1H), 1.27 (s, 9H).  $^{13}C$  NMR (101 MHz, Chloroform-*d*)  $\delta$  168.63, 147.85, 145.43, 133.90, 133.86, 133.10, 130.72, 129.28, 125.78, 123.18, 114.74, 83.82, 56.75, 46.83, 27.83. HRMS: calculated for  $C_{19}H_{22}ClN_3NaO_6S^+$   $[M+Na]^+$  478.0810, found 478.0816.

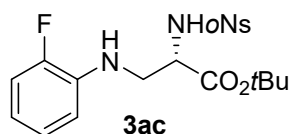

***tert*-butyl (S)-3-((2-fluorophenyl)amino)-2-((2-nitrophenyl)sulfonamido)propanoate (3ac):**

**3ac** was prepared in Method A. Mixture of amine **2c** (0.1333 g, 1.2 equiv) and aziridine **1a** (0.3283 g, 1.0 equiv) was stirred at r.t. for 2 h. The residue was directly purified by column chromatography on silica gel to give **3ac** (0.3979 g, 91 %, brown oil).  $^1H$  NMR (400 MHz, Chloroform-*d*)  $\delta$  8.06 – 8.01 (m, 1H), 7.93 – 7.86 (m, 1H), 7.73 – 7.63 (m, 2H), 6.99 (td,  $J$  = 7.1, 1.2 Hz, 1H), 6.93 (ddd,  $J$  = 11.7, 8.1, 1.5 Hz, 2H), 6.75 (td,  $J$  = 8.4, 1.6 Hz, 1H), 6.66 (tdd,  $J$  = 7.8, 4.9, 1.6 Hz, 1H), 6.37 (d,  $J$  = 8.2 Hz, 1H), 4.27 (dt,  $J$  = 8.2, 5.6 Hz, 1H), 3.62 (dd,  $J$  = 13.7, 5.3 Hz, 1H), 3.57 (dd,  $J$  = 13.7, 5.9 Hz, 1H), 1.28 (s, 9H).  $^{13}C$  NMR (101 MHz, Chloroform-*d*)  $\delta$  168.65, 151.84 (d,  $J$  = 239.2 Hz, 153.02, 150.65), 147.88, 135.36 (d,  $J$  = 11.3 Hz, 135.42, 135.31), 134.05, 133.82, 133.03, 130.64,

125.78, 124.74 (d,  $J = 3.6$  Hz, 124.75, 124.72), 117.93 (d,  $J = 7.0$  Hz, 117.97, 117.90), 114.89 (d,  $J = 18.6$  Hz, 114.98, 114.80), 112.67 (d,  $J = 2.8$  Hz, 112.68, 112.66), 83.88, 56.84, 46.53, 27.83. HRMS: calculated for  $C_{19}H_{22}FN_3NaO_6S^+$   $[M+Na]^+$  462.1106, found 462.1100.

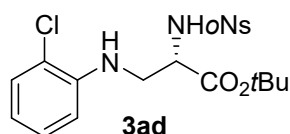

**tert-butyl (S)-3-((2-chlorophenyl)amino)-2-((2-nitrophenyl)sulfonamido)propanoate (3ad):**

**3ad** was prepared in Method A. Mixture of amine **2d** (0.1531 g, 1.2 equiv) and aziridine **1a** (0.3283 g, 1.0 equiv) was stirred at r.t. for 2 h. The residue was directly purified by column chromatography on silica gel to give **3ad** (0.4016 g, 88 %, yellowish brown oil).  $^1H$  NMR (400 MHz, Chloroform-*d*)  $\delta$  8.04 (dd,  $J = 7.4, 1.9$  Hz, 1H), 7.89 (dd,  $J = 7.6, 1.7$  Hz, 1H), 7.71 – 6.62 (m, 2H), 7.21 (dd,  $J = 7.9, 1.5$  Hz, 1H), 7.13 (ddd,  $J = 8.6, 7.4, 1.5$  Hz, 1H), 6.72 (dd,  $J = 8.2, 1.4$  Hz, 1H), 6.67 (td,  $J = 7.6, 1.4$  Hz, 1H), 6.37 (d,  $J = 8.2$  Hz, 1H), 4.29 (dt,  $J = 8.2, 5.7$  Hz, 1H), 3.64 (dd,  $J = 13.6, 5.5$  Hz, 1H), 3.59 (dd,  $J = 13.6, 5.9$  Hz, 1H), 1.30 (s, 9H).  $^{13}C$  NMR (101 MHz, Chloroform-*d*)  $\delta$  168.63, 147.80, 142.79, 134.01, 133.79, 133.05, 130.56, 129.46, 127.96, 125.78, 119.79, 118.34, 111.59, 83.95, 56.72, 46.38, 27.83. HRMS: calculated for  $C_{19}H_{22}ClN_3NaO_6S^+$   $[M+Na]^+$  478.0810, found 478.0810.

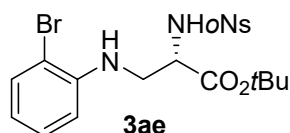

**tert-butyl (S)-3-((2-bromophenyl)amino)-2-((2-nitrophenyl)sulfonamido)propanoate (3ae):**

**3ae** was prepared in Method A. Mixture of amine **2e** (0.2064 g, 1.2 equiv) and aziridine **1a** (0.3283 g, 1.0 equiv) was stirred at r.t. for 2 h. The residue was directly purified by column chromatography on silica gel to give **3ae** (0.4483 g, 90 %, yellowish brown oil).  $^1H$  NMR (400 MHz, Chloroform-*d*)  $\delta$  8.04 (dd,  $J = 7.2, 2.1$  Hz, 1H), 7.93 – 7.85 (m, 1H), 7.71 – 7.61 (m, 2H), 7.38 (dd,  $J = 7.9, 1.5$  Hz, 1H), 7.17 (ddd,  $J = 8.5, 7.4, 1.5$  Hz, 1H), 6.69 (dd,  $J = 8.2, 1.4$  Hz, 1H), 6.60 (td,  $J = 7.6, 1.5$  Hz, 1H), 6.37 (d,  $J = 8.2$  Hz, 1H), 4.60 (t,  $J = 6.4$  Hz, 1H), 4.29 (dt,  $J = 8.1, 5.6$  Hz, 1H), 3.68 – 3.54 (m, 2H), 1.30 (s, 9H).  $^{13}C$  NMR (101 MHz, Chloroform-*d*)  $\delta$  168.61, 147.83, 143.80, 134.09, 133.77, 133.06, 132.75, 130.56, 128.66, 125.82, 118.90, 111.69, 110.36, 83.97, 56.74, 46.56, 27.86. HRMS: calculated for  $C_{19}H_{22}BrN_3NaO_6S^+$   $[M+Na]^+$  522.0305, found 522.0309.

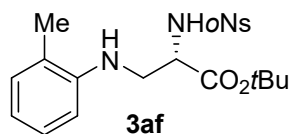

**tert-butyl (S)-2-((2-nitrophenyl)sulfonamido)-3-(o-tolylamino)propanoate (3af):**

**3af** was prepared in Method A. Mixture of amine **2f** (0.1286 g, 1.2 equiv) and aziridine **1a** (0.3283 g, 1.0 equiv) was stirred at r.t. for 2 h. The residue was directly purified by column chromatography on silica gel to give **3af** (0.4079 g, 94 %, reddish brown oil).  $^1H$  NMR (400 MHz, Chloroform-*d*)  $\delta$  8.04 (dd,  $J = 7.3, 2.0$  Hz, 1H), 7.92 – 7.84 (m, 1H), 7.74 – 7.59 (m, 2H), 7.11 (td,  $J = 7.6, 1.8$  Hz, 1H), 7.04 (d,  $J = 7.3$  Hz, 1H), 6.70 (td,  $J = 7.4, 1.1$  Hz, 1H), 6.64 (d,  $J = 8.0$  Hz, 1H), 6.43 (d,  $J = 8.2$  Hz, 1H), 4.30 (ddd,  $J = 8.1, 6.4, 4.7$  Hz, 1H), 3.66 (dd,  $J = 13.3, 4.8$  Hz, 1H), 3.50 (dd,  $J = 13.3, 6.5$  Hz, 1H), 2.11 (s, 3H), 1.28 (s, 9H).  $^{13}C$  NMR (101 MHz, Chloroform-*d*)  $\delta$  168.81, 147.81,

144.73, 133.93, 133.81, 133.05, 130.68, 130.48, 127.18, 125.69, 123.10, 118.23, 110.38, 83.68, 56.83, 46.53, 27.80, 17.45. HRMS: calculated for  $C_{20}H_{26}N_3O_6S^+$   $[M+H]^+$  436.1537, found 436.1548.

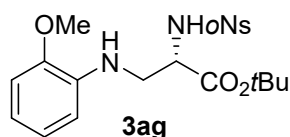

**tert-butyl (S)-3-((2-methoxyphenyl)amino)-2-((2-nitrophenyl)sulfonamido)propanoate (3ag):** **3ag** was prepared in Method A. Mixture of amine **2g** (0.1478 g, 1.2 equiv) and aziridine **1a** (0.3283 g, 1.0 equiv) was stirred at r.t. for 2 h. The residue was directly purified by column chromatography on silica gel to give **3ag** (0.4068 g, 90 %, reddish brown oil).  $^1H$  NMR (400 MHz, Chloroform-*d*)  $\delta$  8.11 – 8.00 (m, 1H), 7.94 – 7.83 (m, 1H), 7.75 – 7.59 (m, 2H), 6.83 (td,  $J = 7.5, 1.6$  Hz, 1H), 6.74 (dd,  $J = 8.0, 1.6$  Hz, 1H), 6.69 (td,  $J = 7.6, 1.5$  Hz, 1H), 6.63 (dd,  $J = 7.8, 1.5$  Hz, 1H), 6.35 (d,  $J = 8.4$  Hz, 1H), 4.28 (dt,  $J = 8.4, 5.5$  Hz, 1H), 3.81 (s, 3H), 3.66 – 3.48 (m, 2H), 1.28 (s, 9H).  $^{13}C$  NMR (101 MHz, Chloroform-*d*)  $\delta$  168.82, 147.68, 147.17, 136.73, 134.12, 133.54, 132.89, 130.55, 125.59, 121.18, 117.57, 110.40, 109.79, 83.41, 56.80, 55.46, 46.54, 27.70. HRMS: calculated for  $C_{20}H_{25}N_3NaO_7S^+$   $[M+Na]^+$  474.1305, found 474.1307.

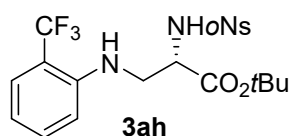

**tert-butyl (S)-2-((2-nitrophenyl)sulfonamido)-3-((2-(trifluoromethyl)phenyl)amino)propanoate (3ah):** **3ah** was prepared in Method A. Mixture of amine **2h** (0.1933 g, 1.2 equiv) and aziridine **1a** (0.3283 g, 1.0 equiv) was stirred at 50 °C for 24 h. The residue was directly purified by column chromatography on silica gel to give **3ah** (0.4480 g, 92 %, yellow solid).  $^1H$  NMR (400 MHz, Chloroform-*d*)  $\delta$  8.10 – 8.03 (m, 1H), 7.94 – 7.86 (m, 1H), 7.74 – 7.64 (m, 2H), 7.42 (d,  $J = 7.9$  Hz, 1H), 7.39 (t,  $J = 7.8$  Hz, 1H), 6.82 (d,  $J = 8.4$  Hz, 1H), 6.77 (t,  $J = 7.8$  Hz, 1H), 6.39 (d,  $J = 8.1$  Hz, 1H), 4.63 (t,  $J = 6.6$  Hz, 1H), 4.29 (dt,  $J = 8.2, 5.5$  Hz, 1H), 3.70-3.60 (m, 2H), 1.26 (s, 9H).  $^{13}C$  NMR (101 MHz, Chloroform-*d*)  $\delta$  168.48, 147.91, 144.57 (q,  $J = 1.8$  Hz, 144.60, 144.58, 144.56, 144.54), 134.00, 133.89, 133.35, 133.11, 130.61, 126.92 (q,  $J = 5.5$  Hz, 127.00, 126.95, 126.89, 126.84), 125.01 (q,  $J = 272.3$  Hz, 129.07, 126.36, 123.66, 120.95), 125.83, 117.22, 114.38 (q,  $J = 29.4$  Hz, 114.82, 114.53, 114.23, 113.94), 112.26, 84.15, 56.76, 46.29, 27.72. HRMS: calculated for  $C_{20}H_{22}F_3N_3NaO_6S^+$   $[M+Na]^+$  512.1074, found 512.1081.

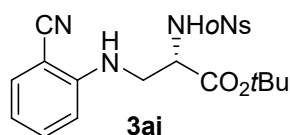

**tert-butyl (S)-3-((2-cyanophenyl)amino)-2-((2-nitrophenyl)sulfonamido)propanoate (3ai):** **3ai** was prepared in Method B. Mixture of amine **2i** (0.1418 g, 1.2 equiv) and aziridine **1a** (0.3283 g, 1.0 equiv) was ground with a pestle and mortar at r.t. for 30 min, followed by standing at 50 °C for 24 h. The residue was directly purified by column chromatography on silica gel to give **3ai** (0.3763 g, 84 %, yellowish solid).  $^1H$  NMR (400 MHz, Chloroform-*d*)  $\delta$  8.05 (dd,  $J = 7.3, 1.9$  Hz, 1H), 7.90 (dd,  $J = 7.6, 1.7$  Hz, 1H), 7.75 – 7.65 (m, 2H), 7.41 (ddd,  $J = 8.8, 7.4, 1.6$  Hz, 1H), 7.36

(dd,  $J = 7.7, 1.6$  Hz, 1H), 6.81 (d,  $J = 8.5$  Hz, 1H), 6.73 (t,  $J = 7.6$  Hz, 1H), 6.40 (d,  $J = 8.0$  Hz, 1H), 4.88 (t,  $J = 6.5$  Hz, 1H), 4.26 (dt,  $J = 8.0, 5.9$  Hz, 1H), 3.74 – 3.62 (m, 2H), 1.31 (s, 9H).  $^{13}\text{C}$  NMR (101 MHz, Chloroform-*d*)  $\delta$  168.34, 149.23, 147.87, 134.52, 133.94, 133.87, 133.10, 133.05, 130.61, 125.86, 117.76, 117.52, 111.08, 96.78, 84.39, 56.59, 46.19, 27.85. HRMS: calculated for  $\text{C}_{20}\text{H}_{22}\text{N}_4\text{NaO}_6\text{S}^+ [\text{M}+\text{Na}]^+$  469.1152, found 469.1164.

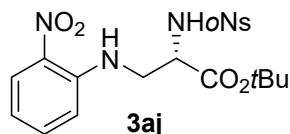

***tert*-butyl (*S*)-3-((2-nitrophenyl)amino)-2-((2-nitrophenyl)sulfonamido)propanoate (**3aj**):**

**3aj** was prepared in Method B. Mixture of amine **2j** (0.1857 g, 1.2 equiv) and aziridine **1a** (0.3283 g, 1.0 equiv) was ground with a pestle and mortar at r.t. for 30 min, followed by standing at 70 °C for 24 h. The residue was directly purified by column chromatography on silica gel to give **3aj** (0.3749 g, 80 %, reddish brown oil, turning into brown solid after standing for long time).  $^1\text{H}$  NMR (400 MHz, Chloroform-*d*)  $\delta$  8.16 (t,  $J = 6.0$  Hz, 1H), 8.13 (dd,  $J = 8.6, 1.7$  Hz, 1H), 8.02 (dd,  $J = 7.6, 1.6$  Hz, 1H), 7.89 (dd,  $J = 7.8, 1.4$  Hz, 1H), 7.75 – 7.61 (m, 2H), 7.48 (ddd,  $J = 8.6, 6.9, 1.6$  Hz, 1H), 6.99 (dd,  $J = 8.7, 1.2$  Hz, 1H), 6.71 (ddd,  $J = 8.4, 7.0, 1.2$  Hz, 1H), 6.40 (d,  $J = 7.8$  Hz, 1H), 4.32 (dt,  $J = 7.7, 5.8$  Hz, 1H), 3.87 – 3.70 (m, 2H), 1.32 (s, 9H).  $^{13}\text{C}$  NMR (101 MHz, Chloroform-*d*)  $\delta$  168.17, 147.82, 144.58, 136.58, 133.95, 133.88, 133.06, 132.72, 130.47, 127.08, 125.83, 116.56, 113.84, 84.59, 56.58, 45.80, 27.84. HRMS: calculated for  $\text{C}_{19}\text{H}_{22}\text{N}_4\text{NaO}_8\text{S}^+ [\text{M}+\text{Na}]^+$  489.1051, found 489.1054.

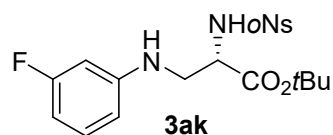

***tert*-butyl (*S*)-3-((3-fluorophenyl)amino)-2-((2-nitrophenyl)sulfonamido)propanoate (**3ak**):**

**3ak** was prepared in Method A. Mixture of amine **2k** (0.1333 g, 1.2 equiv) and aziridine **1a** (0.3283 g, 1.0 equiv) was stirred at r.t. for 2 h. The residue was directly purified by column chromatography on silica gel to give **3ak** (0.4025 g, 92 %, brown oil).  $^1\text{H}$  NMR (400 MHz, Chloroform-*d*)  $\delta$  8.10 – 8.04 (m, 1H), 7.96 – 7.89 (m, 1H), 7.76 – 7.68 (m, 2H), 7.11 (td,  $J = 8.2, 6.7$  Hz, 1H), 6.48 – 6.38 (m, 3H), 6.32 (dt,  $J = 11.4, 2.3$  Hz, 1H), 4.25 (ddd,  $J = 8.0, 6.3, 4.6$  Hz, 1H), 3.61 (dd,  $J = 13.6, 4.7$  Hz, 1H), 3.50 (dd,  $J = 13.6, 6.4$  Hz, 1H), 1.30 (s, 9H).  $^{13}\text{C}$  NMR (101 MHz, Chloroform-*d*)  $\delta$  168.58, 164.11 (d,  $J = 243.3$  Hz, 165.32, 162.90), 148.68 (d,  $J = 10.6$  Hz, 148.73, 148.62), 147.88, 133.91, 133.88, 133.09, 130.74, 130.58 (d,  $J = 10.1$  Hz, 130.63, 130.53), 125.79, 109.48 (d,  $J = 2.6$  Hz, 109.49, 109.46), 105.01 (d,  $J = 21.4$  Hz, 105.12, 104.91), 100.25 (d,  $J = 25.4$  Hz, 100.37, 100.12), 83.93, 56.81, 46.59, 27.84. HRMS: calculated for  $\text{C}_{19}\text{H}_{22}\text{FN}_3\text{NaO}_6\text{S}^+ [\text{M}+\text{Na}]^+$  462.1106, found 462.1101.

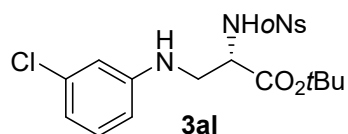

***tert*-butyl (*S*)-3-((3-chlorophenyl)amino)-2-((2-nitrophenyl)sulfonamido)propanoate (**3al**):**

**3al** was prepared in Method A. Mixture of amine **2l** (0.1531 g, 1.2 equiv) and aziridine **1a** (0.3283 g, 1.0 equiv) was stirred at r.t. for 2 h. The residue was directly purified by column chromatography

on silica gel to give **3al** (0.4249 g, 93 %, reddish brown oil). <sup>1</sup>H NMR (400 MHz, Chloroform-*d*) δ 8.07 – 8.01 (m, 1H), 7.91 – 7.85 (m, 1H), 7.74 – 7.63 (m, 2H), 7.06 (t, *J* = 8.0 Hz, 1H), 6.69 (dd, *J* = 8.0, 2.2 Hz, 1H), 6.56 (t, *J* = 2.1 Hz, 1H), 6.50 (dd, *J* = 8.1, 2.3 Hz, 1H), 6.40 (d, *J* = 8.0 Hz, 1H), 4.22 (ddd, *J* = 8.0, 6.4, 4.6 Hz, 1H), 3.58 (dd, *J* = 13.7, 4.6 Hz, 1H), 3.47 (dd, *J* = 13.7, 6.4 Hz, 1H), 1.29 (s, 9H). <sup>13</sup>C NMR (101 MHz, Chloroform-*d*) δ 168.57, 148.06, 147.77, 135.07, 133.91, 133.74, 133.08, 130.68, 130.40, 125.70, 118.26, 113.02, 111.86, 83.89, 56.73, 46.34, 27.80. HRMS: calculated for C<sub>19</sub>H<sub>22</sub>ClN<sub>3</sub>NaO<sub>6</sub>S<sup>+</sup> [M+Na]<sup>+</sup> 478.0810, found 478.0814.

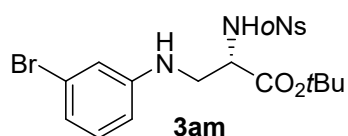

***tert*-butyl (S)-3-((3-bromophenyl)amino)-2-((2-nitrophenyl)sulfonamido)propanoate (3am):**

**3am** was prepared in Method A. Mixture of amine **2m** (0.2064 g, 1.2 equiv) and aziridine **1a** (0.3283 g, 1.0 equiv) was stirred at r.t. for 2 h. The residue was directly purified by column chromatography on silica gel to give **3am** (0.4461 g, 89 %, yellowish brown oil). <sup>1</sup>H NMR (400 MHz, Chloroform-*d*) δ 8.08 – 8.01 (m, 1H), 7.93 – 7.86 (m, 1H), 7.77 – 7.63 (m, 2H), 7.00 (t, *J* = 8.0 Hz, 1H), 6.84 (ddd, *J* = 7.9, 1.8, 0.8 Hz, 1H), 6.72 (t, *J* = 2.1 Hz, 1H), 6.54 (ddd, *J* = 8.2, 2.4, 0.9 Hz, 1H), 6.37 (d, *J* = 7.9 Hz, 1H), 4.21 (ddd, *J* = 7.9, 6.3, 4.6 Hz, 1H), 3.58 (dd, *J* = 13.7, 4.7 Hz, 1H), 3.47 (dd, *J* = 13.6, 6.3 Hz, 1H), 1.30 (s, 9H). <sup>13</sup>C NMR (101 MHz, Chloroform-*d*) δ 168.53, 148.27, 147.87, 133.92, 133.86, 133.08, 130.74, 130.74, 125.78, 123.41, 121.28, 115.92, 112.34, 83.99, 56.80, 46.44, 27.87. HRMS: calculated for C<sub>19</sub>H<sub>22</sub>BrN<sub>3</sub>NaO<sub>6</sub>S<sup>+</sup> [M+Na]<sup>+</sup> 522.0305, found 522.0304.

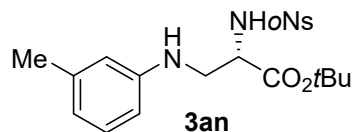

***tert*-butyl (S)-2-((2-nitrophenyl)sulfonamido)-3-(*m*-tolylamino)propanoate (3an):**

**3an** was prepared in Method A. Mixture of amine **2n** (0.1286 g, 1.2 equiv) and aziridine **1a** (0.3283 g, 1.0 equiv) was stirred at r.t. for 2 h. The residue was directly purified by column chromatography on silica gel to give **3an** (0.3964 g, 91 %, reddish brown oil). <sup>1</sup>H NMR (400 MHz, Chloroform-*d*) δ 8.09 – 8.02 (m, 1H), 7.93 – 7.85 (m, 1H), 7.73 – 7.63 (m, 2H), 7.10 – 7.00 (m, 1H), 6.58 (d, *J* = 7.5 Hz, 1H), 6.48 – 6.43 (m, 2H), 6.39 (d, *J* = 8.1 Hz, 1H), 4.26 (ddd, *J* = 8.1, 6.2, 4.7 Hz, 1H), 3.59 (dd, *J* = 13.5, 4.8 Hz, 1H), 3.49 (dd, *J* = 13.5, 6.3 Hz, 1H), 2.27 (s, 3H), 1.28 (s, 9H). <sup>13</sup>C NMR (101 MHz, Chloroform-*d*) δ 168.81, 147.82, 146.69, 139.18, 133.98, 133.76, 133.01, 130.71, 129.28, 125.68, 119.67, 114.57, 110.84, 83.60, 56.90, 46.89, 27.82, 21.68. HRMS: calculated for C<sub>20</sub>H<sub>26</sub>N<sub>3</sub>O<sub>6</sub>S<sup>+</sup> [M+H]<sup>+</sup> 436.1537, found 436.1540.

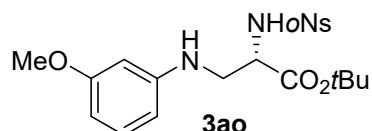

***tert*-butyl (S)-3-((3-methoxyphenyl)amino)-2-((2-nitrophenyl)sulfonamido)propanoate (3ao):**

**3ao** was prepared in Method A. Mixture of amine **2o** (0.1478 g, 1.2 equiv) and aziridine **1a** (0.3283 g, 1.0 equiv) was stirred at r.t. for 2 h. The residue was directly purified by column chromatography on silica gel to give **3ao** (0.4008 g, 89 %, reddish brown oil). <sup>1</sup>H NMR (400 MHz, Chloroform-*d*)



$^1\text{H}$  NMR (400 MHz, Chloroform-*d*)  $\delta$  8.08 – 8.00 (m, 1H), 7.92 – 7.84 (m, 1H), 7.72 – 7.64 (m, 2H), 7.06 (t,  $J = 8.1$  Hz, 1H), 6.36 (d,  $J = 8.1$  Hz, 1H), 6.30 (dd,  $J = 8.1, 2.3$  Hz, 1H), 6.22 (dd,  $J = 8.0, 2.2$  Hz, 1H), 6.17 (t,  $J = 2.3$  Hz, 1H), 4.24 (ddd,  $J = 8.2, 6.3, 4.8$  Hz, 1H), 3.76 (s, 3H), 3.58 (dd,  $J = 13.6, 4.8$  Hz, 1H), 3.47 (dd,  $J = 13.5, 6.3$  Hz, 2H), 1.28 (s, 9H).  $^{13}\text{C}$  NMR (101 MHz, Chloroform-*d*)  $\delta$  168.77, 160.93, 148.34, 147.86, 133.98, 133.80, 133.04, 130.74, 130.20, 125.74, 106.50, 103.86, 99.55, 83.68, 56.91, 55.24, 46.73, 27.84. HRMS: calculated for  $\text{C}_{20}\text{H}_{25}\text{N}_3\text{NaO}_7\text{S}^+$   $[\text{M}+\text{Na}]^+$  474.1305, found 474.1314.

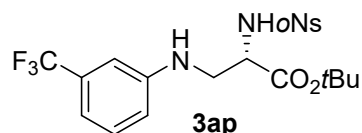

*tert*-butyl

(*S*)-2-((2-nitrophenyl)sulfonamido)-3-((3-

(trifluoromethyl)phenyl)amino)propanoate (**3ap**):

**3ap** was prepared in Method A. Mixture of amine **2p** (0.1933 g, 1.2 equiv) and aziridine **1a** (0.3283 g, 1.0 equiv) was stirred at r.t. for 4 h. The residue was directly purified by column chromatography on silica gel to give **3ap** (0.4449 g, 91 %, brown oil).  $^1\text{H}$  NMR (400 MHz, Chloroform-*d*)  $\delta$  8.04 (dd,  $J = 7.2, 2.0$  Hz, 1H), 7.92 – 7.86 (m, 1H), 7.72 – 7.64 (m, 2H), 7.24 (d,  $J = 8.0$  Hz, 1H), 6.96 (d,  $J = 7.7$  Hz, 1H), 6.80 – 6.75 (m, 2H), 6.41 (d,  $J = 7.9$  Hz, 1H), 4.29 (t,  $J = 6.6$  Hz, 1H), 4.23 (ddd,  $J = 7.8, 6.3, 4.5$  Hz, 1H), 3.63 (dt,  $J = 13.4, 5.3$  Hz, 1H), 3.52 (dt,  $J = 13.0, 5.9$  Hz, 1H), 1.28 (s, 9H).  $^{13}\text{C}$  NMR (101 MHz, Chloroform-*d*)  $\delta$  168.49, 147.88, 147.25, 133.94, 133.83, 133.10, 131.73 (q,  $J = 31.8$  Hz, 132.20, 131.89, 131.57, 131.25), 130.71, 129.91, 124.35 (q,  $J = 272.5$  Hz, 128.41, 125.70, 122.99, 120.28), 125.80, 116.71, 114.92 (q,  $J = 3.9$  Hz, 114.98, 114.94, 114.90, 114.86), 109.41 (q,  $J = 3.7$  Hz, 109.47, 109.43, 109.39, 109.35), 84.04, 56.80, 46.48, 27.82. HRMS: calculated for  $\text{C}_{20}\text{H}_{22}\text{F}_3\text{N}_3\text{NaO}_6\text{S}^+$   $[\text{M}+\text{Na}]^+$  512.1074, found 512.1070.

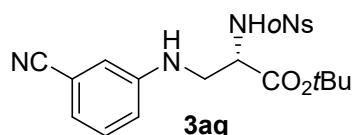

*tert*-butyl (*S*)-3-((3-cyanophenyl)amino)-2-((2-nitrophenyl)sulfonamido)propanoate (**3aq**):

**3aq** was prepared in Method B. Mixture of amine **2q** (0.1418 g, 1.2 equiv) and aziridine **1a** (0.3283 g, 1.0 equiv) was ground with a pestle and mortar at r.t. for 30 min, followed by standing at 50 °C for 12 h. The residue was directly purified by column chromatography on silica gel to give **3aq** (0.3922 g, 88 %, yellowish oil).  $^1\text{H}$  NMR (400 MHz, Chloroform-*d*)  $\delta$  8.05 (dd,  $J = 7.0, 2.3$  Hz, 1H), 7.92 (dd,  $J = 7.1, 2.0$  Hz, 1H), 7.77 – 7.67 (m, 2H), 7.23 (t,  $J = 7.9$  Hz, 2H), 7.00 (d,  $J = 7.4$  Hz, 1H), 6.85 (dd,  $J = 8.3, 2.5$  Hz, 1H), 6.80 (t,  $J = 1.9$  Hz, 1H), 6.43 (d,  $J = 8.0$  Hz, 1H), 4.21 (ddd,  $J = 8.0, 6.6, 4.4$  Hz, 1H), 3.62 (dd,  $J = 13.6, 4.5$  Hz, 1H), 3.49 (dd,  $J = 13.6, 6.6$  Hz, 1H), 1.28 (s, 9H).  $^{13}\text{C}$  NMR (101 MHz, Chloroform-*d*)  $\delta$  168.37, 147.84, 147.41, 134.03, 133.73, 133.16, 130.70, 130.19, 125.81, 121.80, 119.36, 118.10, 115.35, 113.11, 84.11, 56.71, 46.14, 27.82. HRMS: calculated for  $\text{C}_{20}\text{H}_{22}\text{N}_4\text{NaO}_6\text{S}^+$   $[\text{M}+\text{Na}]^+$  469.1152, found 469.1153.

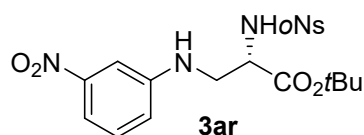

*tert*-butyl (*S*)-3-((3-nitrophenyl)amino)-2-((2-nitrophenyl)sulfonamido)propanoate (**3ar**):

**3ar** was prepared in Method B. Mixture of amine **2r** (0.1857 g, 1.2 equiv) and aziridine **1a** (0.3283 g, 1.0 equiv) was ground with a pestle and mortar at r.t. for 30 min, followed by standing at 70 °C for 12 h. The residue was directly purified by column chromatography on silica gel to give **3ar** (0.4359 g, 93 %, reddish brown oil). <sup>1</sup>H NMR (400 MHz, Chloroform-*d*) δ 8.10 – 8.01 (m, 1H), 7.95 – 7.86 (m, 1H), 7.78 – 7.65 (m, 2H), 7.56 (ddd, *J* = 8.1, 2.2, 0.9 Hz, 1H), 7.40 (t, *J* = 2.3 Hz, 1H), 7.29 (t, *J* = 8.1 Hz, 1H), 6.94 (ddd, *J* = 8.3, 2.5, 0.9 Hz, 1H), 6.46 (d, *J* = 7.9 Hz, 1H), 4.53 (t, *J* = 6.5 Hz, 1H), 4.24 (ddd, *J* = 7.9, 6.6, 4.3 Hz, 1H), 3.68 (ddd, *J* = 13.6, 6.7, 4.4 Hz, 1H), 3.55 (dt, *J* = 13.4, 6.5 Hz, 1H), 1.29 (s, 9H). <sup>13</sup>C NMR (101 MHz, Chloroform-*d*) δ 168.32, 149.50, 147.97, 147.87, 134.03, 133.73, 133.16, 130.72, 130.05, 125.87, 119.80, 113.08, 106.73, 84.23, 56.75, 46.35, 27.83. HRMS: calculated for C<sub>19</sub>H<sub>22</sub>N<sub>4</sub>NaO<sub>8</sub>S<sup>+</sup> [M+Na]<sup>+</sup> 489.1051, found 489.1063.

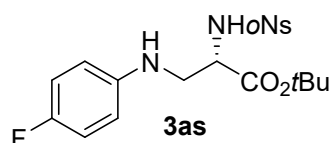

**tert-butyl (S)-3-((4-fluorophenyl)amino)-2-((2-nitrophenyl)sulfonamido)propanoate (3as):**

**3as** was prepared in Method A. Mixture of amine **2s** (0.1333 g, 1.2 equiv) and aziridine **1a** (0.3283 g, 1.0 equiv) was stirred at r.t. for 2 h. The residue was directly purified by column chromatography on silica gel to give **3as** (0.3874 g, 88 %, reddish brown oil). <sup>1</sup>H NMR (400 MHz, Chloroform-*d*) δ 8.07 – 8.00 (m, 1H), 7.94 – 7.85 (m, 1H), 7.74 – 7.64 (m, 2H), 6.87 (t, *J* = 8.7 Hz, 2H), 6.60 – 6.51 (m, 2H), 6.39 (d, *J* = 8.2 Hz, 1H), 4.22 (ddd, *J* = 8.2, 6.4, 4.5 Hz, 1H), 3.56 (dd, *J* = 13.5, 4.6 Hz, 1H), 3.43 (dd, *J* = 13.5, 6.4 Hz, 1H), 1.26 (s, 9H). <sup>13</sup>C NMR (101 MHz, Chloroform-*d*) δ 168.73, 156.50 (d, *J* = 236.3 Hz, 157.67, 155.32), 147.92, 143.25 (d, *J* = 1.9 Hz, 143.26, 143.24), 134.01, 133.85, 133.06, 130.73, 125.80, 115.92 (d, *J* = 22.4 Hz, 116.03, 115.81), 114.67 (d, *J* = 7.4 Hz, 114.71, 114.64), 83.74, 56.92, 47.54, 27.86. HRMS: calculated for C<sub>19</sub>H<sub>22</sub>FN<sub>3</sub>NaO<sub>6</sub>S<sup>+</sup> [M+Na]<sup>+</sup> 462.1106, found 462.1110.

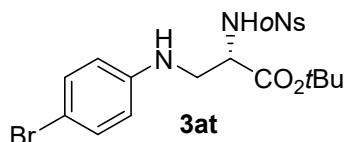

**tert-butyl (S)-3-((4-bromophenyl)amino)-2-((2-nitrophenyl)sulfonamido)propanoate (3at):**

**3at** was prepared in Method B. Mixture of amine **2t** (0.2064 g, 1.2 equiv) and aziridine **1a** (0.3283 g, 1.0 equiv) was ground with a pestle and mortar at r.t. for 30 min, followed by standing at r.t. for 2 h. The residue was directly purified by column chromatography on silica gel to give **3at** (0.4153 g, 83 %, reddish brown oil). <sup>1</sup>H NMR (400 MHz, Chloroform-*d*) δ 8.07 – 7.98 (m, 1H), 7.92 – 7.86 (m, 1H), 7.76 – 7.63 (m, 2H), 7.25 – 7.21 (m, 2H), 6.56 – 6.47 (m, 2H), 6.38 (d, *J* = 8.0 Hz, 1H), 4.21 (ddd, *J* = 8.0, 6.5, 4.6 Hz, 1H), 3.57 (dd, *J* = 13.6, 4.7 Hz, 1H), 3.45 (dd, *J* = 13.6, 6.5 Hz, 1H), 1.27 (s, 9H). <sup>13</sup>C NMR (101 MHz, Chloroform-*d*) δ 168.62, 147.83, 145.97, 133.90, 133.83, 133.10, 132.13, 130.70, 125.77, 115.11, 110.13, 83.82, 56.73, 46.65, 27.83. HRMS: calculated for C<sub>19</sub>H<sub>22</sub>BrN<sub>3</sub>NaO<sub>6</sub>S<sup>+</sup> [M+Na]<sup>+</sup> 522.0305, found 522.0306.

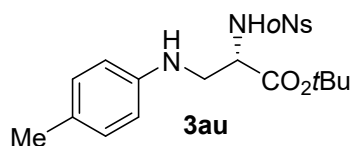

**tert-butyl (S)-2-((2-nitrophenyl)sulfonamido)-3-(p-tolylamino)propanoate (3au):**

**3au** was prepared in Method B. Mixture of amine **2u** (0.1286 g, 1.2 equiv) and aziridine **1a** (0.3283 g, 1.0 equiv) was ground with a pestle and mortar at r.t. for 30 min, followed by standing at r.t. for 2 h. The residue was directly purified by column chromatography on silica gel to give **3au** (0.3742 g, 86 %, reddish brown oil). <sup>1</sup>H NMR (400 MHz, Chloroform-*d*) δ 8.07 – 8.00 (m, 1H), 7.88 (dd, *J* = 7.5, 1.8 Hz, 1H), 7.72 – 7.64 (m, 2H), 6.97 (d, *J* = 8.1 Hz, 2H), 6.54 (d, *J* = 8.4 Hz, 2H), 6.37 (d, *J* = 8.2 Hz, 1H), 4.24 (ddd, *J* = 8.3, 6.2, 4.6 Hz, 1H), 3.58 (dd, *J* = 13.5, 4.8 Hz, 1H), 3.45 (dd, *J* = 13.5, 6.3 Hz, 1H), 2.24 (s, 3H), 1.27 (s, 9H). <sup>13</sup>C NMR (101 MHz, Chloroform-*d*) δ 168.87, 147.84, 144.59, 134.01, 133.76, 133.02, 130.71, 129.91, 127.81, 125.72, 113.84, 83.52, 56.93, 47.20, 27.83, 20.51. HRMS: calculated for C<sub>20</sub>H<sub>26</sub>N<sub>3</sub>O<sub>6</sub>S<sup>+</sup> [M+H]<sup>+</sup> 436.1537, found 436.1538.

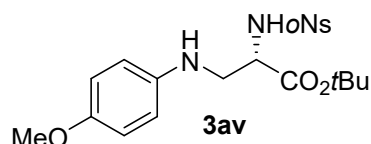

**tert-butyl (S)-3-((4-methoxyphenyl)amino)-2-((2-nitrophenyl)sulfonamido)propanoate (3av):**

**3av** was prepared in Method B. Mixture of amine **2v** (0.1478 g, 1.2 equiv) and aziridine **1a** (0.3283 g, 1.0 equiv) was ground with a pestle and mortar at r.t. for 30 min, followed by standing at r.t. for 2 h. The residue was directly purified by column chromatography on silica gel to give **3av** (0.3809 g, 84 %, reddish brown oil). <sup>1</sup>H NMR (400 MHz, Chloroform-*d*) δ 8.08 – 7.99 (m, 1H), 7.93 – 7.85 (m, 1H), 7.74 – 7.63 (m, 2H), 6.80 – 6.72 (m, 2H), 6.64 – 6.54 (m, 2H), 6.37 (d, *J* = 8.2 Hz, 1H), 4.23 (ddd, *J* = 8.2, 6.2, 4.5 Hz, 1H), 3.74 (s, 3H), 3.55 (dd, *J* = 13.4, 4.6 Hz, 1H), 3.42 (dd, *J* = 13.4, 6.3 Hz, 1H), 1.27 (s, 9H). <sup>13</sup>C NMR (101 MHz, Chloroform-*d*) δ 168.89, 152.95, 147.87, 140.94, 134.05, 133.77, 133.02, 130.71, 125.74, 115.22, 115.01, 83.52, 56.97, 55.86, 47.93, 27.85. HRMS: calculated for C<sub>20</sub>H<sub>26</sub>N<sub>3</sub>O<sub>7</sub>S<sup>+</sup> [M+H]<sup>+</sup> 452.1486, found 452.1488.

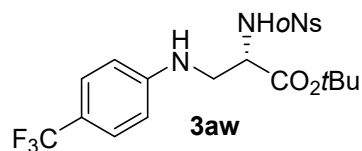

**tert-butyl (S)-2-((2-nitrophenyl)sulfonamido)-3-((4-(trifluoromethyl)phenyl)amino)propanoate (3aw):**

**3aw** was prepared in Method A. Mixture of amine **2w** (0.1933 g, 1.2 equiv) and aziridine **1a** (0.3283 g, 1.0 equiv) was stirred at r.t. for 4 h. The residue was directly purified by column chromatography on silica gel to give **3aw** (0.4436 g, 91 %, yellowish brown oil). <sup>1</sup>H NMR (400 MHz, Chloroform-*d*) δ 8.07 – 8.00 (m, 1H), 7.93 – 7.85 (m, 1H), 7.75 – 7.63 (m, 2H), 7.38 (d, *J* = 8.5 Hz, 2H), 6.63 (d, *J* = 8.5 Hz, 2H), 6.41 (d, *J* = 7.9 Hz, 1H), 4.43 (t, *J* = 6.0 Hz, 1H), 4.23 (ddd, *J* = 7.9, 6.5, 4.6 Hz, 1H), 3.65 (dt, *J* = 13.7, 5.5 Hz, 1H), 3.53 (dt, *J* = 13.2, 6.2 Hz, 1H), 1.28 (s, 9H). <sup>13</sup>C NMR (101 MHz, Chloroform-*d*) δ 168.47, 149.58, 147.88, 133.98, 133.80, 133.12, 130.72, 126.81 (q, *J* = 3.9 Hz, 126.87, 126.83, 126.79, 126.76), 124.93 (q, *J* = 270.3 Hz, 128.96, 126.27, 123.58, 120.90), 125.81, 119.99 (q, *J* = 32.7 Hz, 120.48, 120.16, 119.83, 119.51), 112.61, 84.05, 56.77, 46.16, 27.83. HRMS: calculated for C<sub>20</sub>H<sub>22</sub>F<sub>3</sub>N<sub>3</sub>NaO<sub>6</sub>S<sup>+</sup> [M+Na]<sup>+</sup> 512.1074, found 512.1079.

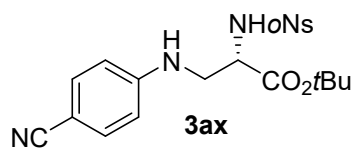

**tert-butyl (S)-3-((4-cyanophenyl)amino)-2-((2-nitrophenyl)sulfonamido)propanoate (3ax):**

**3ax** was prepared in Method B. Mixture of amine **2x** (0.1418 g, 1.2 equiv) and aziridine **1a** (0.3283 g, 1.0 equiv) was ground with a pestle and mortar at r.t. for 30 min, followed by standing at 50 °C for 12 h. The residue was directly purified by column chromatography on silica gel to give **3ax** (0.4230 g, 95 %, yellowish oil). <sup>1</sup>H NMR (400 MHz, Chloroform-*d*) δ 8.08 – 8.01 (m, 1H), 7.94 – 7.87 (m, 1H), 7.78 – 7.66 (m, 2H), 7.44 – 7.37 (m, 2H), 6.66 – 6.58 (m, 2H), 6.46 (d, *J* = 7.9 Hz, 1H), 4.73 (t, *J* = 6.5 Hz, 1H), 4.22 (ddd, *J* = 8.0, 6.6, 4.6 Hz, 1H), 3.65 (ddd, *J* = 13.8, 6.3, 4.7 Hz, 1H), 3.54 (dt, *J* = 13.5, 6.5 Hz, 1H), 1.26 (s, 9H). <sup>13</sup>C NMR (101 MHz, Chloroform-*d*) δ 168.21, 150.43, 147.85, 134.07, 133.88, 133.67, 133.18, 130.69, 125.83, 120.24, 112.91, 100.00, 84.21, 56.74, 45.74, 27.79. HRMS: calculated for C<sub>20</sub>H<sub>22</sub>N<sub>4</sub>NaO<sub>6</sub>S<sup>+</sup> [M+Na]<sup>+</sup> 469.1152, found 469.1150.

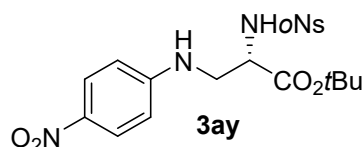

**tert-butyl (S)-3-((4-nitrophenyl)amino)-2-((2-nitrophenyl)sulfonamido)propanoate (3ay):**

**3ay** was prepared in Method B. Mixture of amine **2y** (0.1857 g, 1.2 equiv) and aziridine **1a** (0.3283 g, 1.0 equiv) was ground with a pestle and mortar at r.t. for 30 min, followed by standing at 70 °C for 12 h. The residue was directly purified by column chromatography on silica gel to give **3ay** (0.4239 g, 91 %, yellow solid). <sup>1</sup>H NMR (400 MHz, Chloroform-*d*) δ 8.12 – 8.00 (m, 3H), 7.91 (dd, *J* = 7.3, 1.9 Hz, 1H), 7.77 – 7.67 (m, 2H), 6.63 – 6.56 (m, 2H), 6.50 (d, *J* = 7.8 Hz, 1H), 5.06 (t, *J* = 6.4 Hz, 1H), 4.24 (td, *J* = 7.1, 4.4 Hz, 1H), 3.72 (ddd, *J* = 13.9, 6.4, 4.6 Hz, 1H), 3.61 (dt, *J* = 13.6, 6.6 Hz, 1H), 1.26 (s, 9H). <sup>13</sup>C NMR (101 MHz, Chloroform-*d*) δ 168.07, 152.51, 147.84, 138.86, 134.15, 133.57, 133.24, 130.71, 126.45, 125.86, 111.81, 84.38, 56.72, 45.82, 27.80. HRMS: calculated for C<sub>19</sub>H<sub>22</sub>N<sub>4</sub>NaO<sub>8</sub>S<sup>+</sup> [M+Na]<sup>+</sup> 489.1051, found 489.1061.

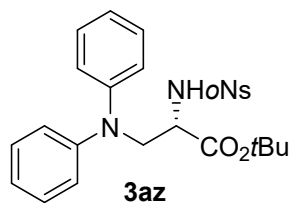

**tert-butyl (S)-3-(diphenylamino)-2-((2-nitrophenyl)sulfonamido)propanoate (3az):**

**3az** was prepared in Method B. Mixture of amine **2z** (0.2031 g, 1.2 equiv) and aziridine **1a** (0.3283 g, 1.0 equiv) was ground with a pestle and mortar at r.t. for 30 min, followed by standing at 70 °C for 24 h. The residue was directly purified by column chromatography on silica gel to give **3az** (0.4688 g, 94 %, yellow solid). <sup>1</sup>H NMR (400 MHz, Chloroform-*d*) δ 8.02 – 7.95 (m, 1H), 7.90 – 7.84 (m, 1H), 7.72 – 7.59 (m, 2H), 7.30 – 7.19 (m, 4H), 7.05 – 6.91 (m, 6H), 6.20 (d, *J* = 9.0 Hz, 1H), 4.40 (dt, *J* = 9.1, 6.4 Hz, 1H), 4.18 (dd, *J* = 15.0, 6.2 Hz, 1H), 4.04 (dd, *J* = 15.0, 6.8 Hz, 1H), 1.14 (s, 9H). <sup>13</sup>C NMR (101 MHz, Chloroform-*d*) δ 169.12, 147.79, 147.56, 134.31, 133.67, 133.03, 130.65, 129.54, 125.71, 122.45, 121.55, 83.18, 56.53, 55.37, 27.67. HRMS: calculated for C<sub>25</sub>H<sub>27</sub>N<sub>3</sub>NaO<sub>6</sub>S<sup>+</sup> [M+Na]<sup>+</sup> 520.1513, found 520.1526.

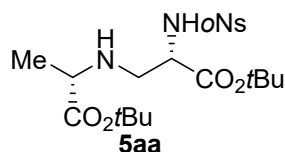

**tert-butyl (S)-3-(((S)-1-(tert-butoxy)-1-oxopropan-2-yl)amino)-2-((2-nitrophenyl)sulfonamido)propanoate (5aa):**

**5aa** was prepared in Method A. Mixture of amine **4a** (0.1742 g, 1.2 equiv) and aziridine **1a** (0.3283 g, 1.0 equiv) was stirred at r.t. for 2 h. The residue was directly purified by column chromatography on silica gel to give **5aa** (0.3982 g, 84 %, yellowish oil). <sup>1</sup>H NMR (400 MHz, DMSO-*d*<sub>6</sub>) δ 8.09 – 8.02 (m, 1H), 7.98 – 7.93 (m, 1H), 7.88 – 7.82 (m, 2H), 3.91 (t, *J* = 6.3 Hz, 1H), 3.09 (q, *J* = 6.9 Hz, 1H), 2.80 (dd, *J* = 12.3, 7.1 Hz, 1H), 2.72 (dd, *J* = 12.3, 5.4 Hz, 1H), 1.39 (s, 9H), 1.22 (s, 9H), 1.05 (d, *J* = 6.9 Hz, 3H). <sup>13</sup>C NMR (101 MHz, DMSO-*d*<sub>6</sub>) δ 173.77, 169.00, 147.36, 134.08, 133.24, 132.55, 130.05, 124.22, 81.05, 80.18, 56.72, 55.95, 48.38, 27.67, 27.34, 18.25. HRMS: calculated for C<sub>20</sub>H<sub>32</sub>N<sub>3</sub>O<sub>8</sub>S<sup>+</sup> [M+H]<sup>+</sup> 474.1905, found 474.1923.

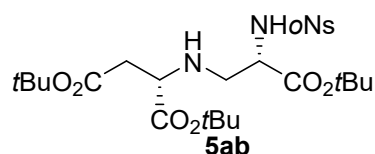

**di-tert-butyl ((S)-3-(tert-butoxy)-2-((2-nitrophenyl)sulfonamido)-3-oxopropyl)-L-aspartate (5ab):**

**5ab** was prepared in Method A. Mixture of amine **4b** (0.2944 g, 1.2 equiv) and aziridine **1a** (0.3283 g, 1.0 equiv) was stirred at r.t. for 2 h. The residue was directly purified by column chromatography on silica gel to give **5ab** (0.5494 g, 96 %, yellowish oil, turning into white solid after standing for long time). <sup>1</sup>H NMR (400 MHz, Chloroform-*d*) δ 8.13 – 8.01 (m, 1H), 7.93 – 7.81 (m, 1H), 7.74 – 7.62 (m, 2H), 6.64 (d, *J* = 8.0 Hz, 1H), 4.16 – 4.06 (m, 1H), 3.38 (dd, *J* = 6.7, 5.5 Hz, 1H), 3.28 (dd, *J* = 12.5, 4.2 Hz, 1H), 2.78 (dd, *J* = 12.5, 4.4 Hz, 1H), 2.58 (dd, *J* = 16.1, 5.5 Hz, 1H), 2.49 (dd, *J* = 16.1, 6.8 Hz, 1H), 1.44 (s, 18H), 1.26 (s, 9H). <sup>13</sup>C NMR (101 MHz, Chloroform-*d*) δ 172.59, 170.22, 169.03, 147.91, 134.86, 133.43, 132.75, 130.65, 125.45, 82.72, 81.83, 81.34, 58.87, 57.66, 50.50, 39.49, 28.18, 28.14, 27.83. HRMS: calculated for C<sub>25</sub>H<sub>40</sub>N<sub>3</sub>O<sub>10</sub>S<sup>+</sup> [M+H]<sup>+</sup> 574.2429, found 574.2458.<sup>2</sup>

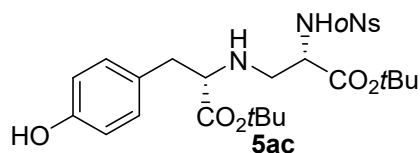

**tert-butyl ((S)-3-(tert-butoxy)-2-((2-nitrophenyl)sulfonamido)-3-oxopropyl)-L-tyrosinate (5ac):**

**5ac** was prepared in Method B. Mixture of amine **4c** (0.2848 g, 1.2 equiv) and aziridine **1a** (0.3283 g, 1.0 equiv) was ground with a pestle and mortar at r.t. for 30 min, followed by standing at 50 °C for 4 h. The residue was directly purified by column chromatography on silica gel to give **5ac** (0.4790 g, 85 %, yellowish oil). <sup>1</sup>H NMR (400 MHz, Chloroform-*d*) δ 8.09 – 8.02 (m, 1H), 7.94 – 7.86 (m, 1H), 7.74 – 7.66 (m, 2H), 7.03 (d, *J* = 8.1 Hz, 2H), 6.72 (d, *J* = 8.0 Hz, 2H), 4.12 (t, *J* = 4.5 Hz, 1H), 3.26 (t, *J* = 6.6 Hz, 1H), 3.13 (dd, *J* = 12.4, 4.4 Hz, 1H), 2.80 (d, *J* = 6.6 Hz, 2H), 2.71 (dd, *J* = 12.4, 4.5 Hz, 1H), 1.38 (s, 9H), 1.24 (s, 9H). <sup>13</sup>C NMR (101 MHz, Chloroform-*d*) δ 173.53, 169.11, 154.78, 147.82, 134.71, 133.55, 132.90, 130.65, 130.62, 128.83, 125.56, 115.48, 115.42, 82.92, 81.78, 63.61, 57.35, 49.93, 38.90, 28.16, 27.78. HRMS: calculated for C<sub>26</sub>H<sub>36</sub>N<sub>3</sub>O<sub>9</sub>S<sup>+</sup> [M+H]<sup>+</sup> 566.2167, found 566.2179.

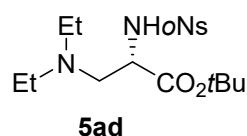

***tert*-butyl (S)-3-(diethylamino)-2-((2-nitrophenyl)sulfonamido)propanoate (5ad):**

**5ad** was prepared in Method A. Mixture of amine **4d** (0.0878 g, 1.2 equiv) and aziridine **1a** (0.3283 g, 1.0 equiv) was stirred at r.t. for 2 h. The residue was directly purified by column chromatography on silica gel to give **5ad** (0.3384 g, 84 %, reddish brown oil). <sup>1</sup>H NMR (400 MHz, Chloroform-*d*) δ 8.13 – 8.04 (m, 1H), 7.93 – 7.83 (m, 1H), 7.76 – 7.65 (m, 2H), 3.99 (t, *J* = 6.3 Hz, 1H), 2.77 (d, *J* = 6.3 Hz, 2H), 2.46 (qd, *J* = 7.1, 1.9 Hz, 4H), 1.30 (s, 9H), 0.92 (t, *J* = 7.1 Hz, 6H). <sup>13</sup>C NMR (101 MHz, Chloroform-*d*) δ 169.98, 147.84, 134.78, 133.43, 132.83, 130.74, 125.48, 82.29, 56.16, 55.04, 46.99, 27.85, 11.72. HRMS: calculated for C<sub>17</sub>H<sub>27</sub>N<sub>3</sub>NaO<sub>6</sub>S<sup>+</sup> [M+Na]<sup>+</sup> 424.1513, found 424.1521.

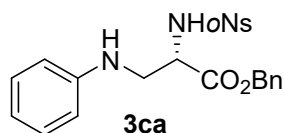

**benzyl (S)-2-((2-nitrophenyl)sulfonamido)-3-(phenylamino)propanoate (3ca):**

**3ca** was prepared in Method A. Mixture of amine **2a** (0.1176 g, 1.2 equiv) and aziridine **1b** (0.3624 g, 1.0 equiv) was stirred at r.t. for 2 h. The residue was directly purified by column chromatography on silica gel to give **3ca** (0.3936 g, 86 %, brown solid). <sup>1</sup>H NMR (400 MHz, Chloroform-*d*) δ 7.97 (dd, *J* = 7.5, 1.7 Hz, 1H), 7.77 (dd, *J* = 7.8, 1.5 Hz, 1H), 7.62 (td, *J* = 7.7, 1.7 Hz, 1H), 7.57 (td, *J* = 7.5, 1.5 Hz, 1H), 7.41 – 7.28 (m, 3H), 7.23 – 7.04 (m, 4H), 6.74 (t, *J* = 7.3 Hz, 1H), 6.57 (d, *J* = 8.0 Hz, 2H), 6.43 (d, *J* = 8.1 Hz, 1H), 4.96 (s, 2H), 4.41 (dt, *J* = 8.2, 5.3 Hz, 1H), 3.66 (dd, *J* = 13.8, 4.9 Hz, 1H), 3.57 (dd, *J* = 13.8, 5.9 Hz, 1H). <sup>13</sup>C NMR (101 MHz, Chloroform-*d*) δ 169.80, 147.60, 146.67, 134.62, 133.80, 133.72, 132.98, 130.58, 129.47, 128.85, 128.80, 128.55, 125.79, 118.72, 113.57, 67.98, 56.35, 46.72. HRMS: calculated for C<sub>22</sub>H<sub>21</sub>N<sub>3</sub>NaO<sub>6</sub>S<sup>+</sup> [M+Na]<sup>+</sup> 478.1043, found 478.1036.

## Crystallographic data

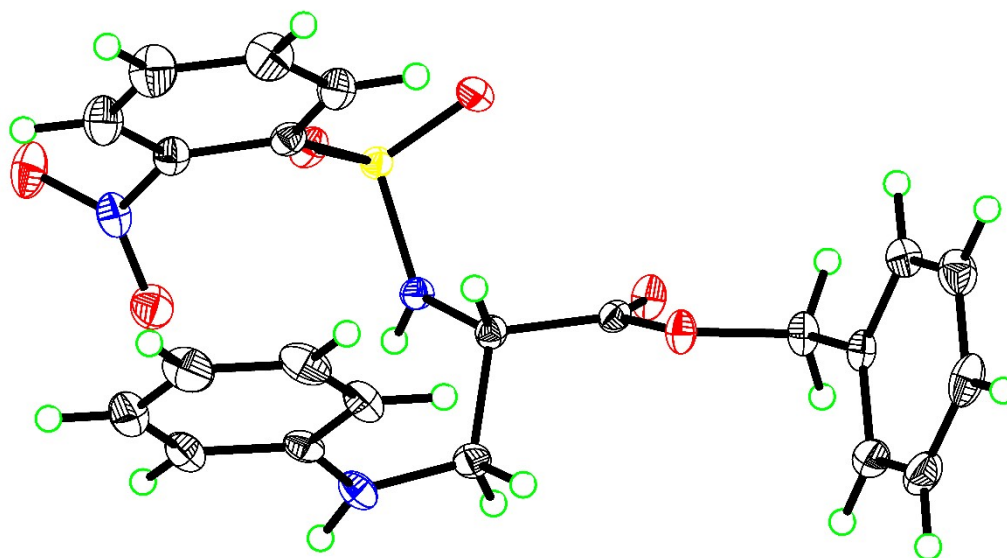

Figure S1. X-Ray structure of 3ca

**Table S1** Crystal data and structure refinement for 0001-ZDJ-1-100K\_auto.

---

|                                             |                                                                 |
|---------------------------------------------|-----------------------------------------------------------------|
| Identification code                         | 0001-ZDJ-1-100K_auto                                            |
| Empirical formula                           | C <sub>22</sub> H <sub>21</sub> N <sub>3</sub> O <sub>6</sub> S |
| Formula weight                              | 455.48                                                          |
| Temperature/K                               | 100.00(10)                                                      |
| Crystal system                              | orthorhombic                                                    |
| Space group                                 | P2 <sub>1</sub> 2 <sub>1</sub> 2 <sub>1</sub>                   |
| a/Å                                         | 8.58560(10)                                                     |
| b/Å                                         | 12.11150(10)                                                    |
| c/Å                                         | 21.14980(10)                                                    |
| $\alpha$ /°                                 | 90                                                              |
| $\beta$ /°                                  | 90                                                              |
| $\gamma$ /°                                 | 90                                                              |
| Volume/Å <sup>3</sup>                       | 2199.25(3)                                                      |
| Z                                           | 4                                                               |
| $\rho_{\text{calc}}$ /cm <sup>3</sup>       | 1.376                                                           |
| $\mu$ /mm <sup>-1</sup>                     | 1.692                                                           |
| F(000)                                      | 952.0                                                           |
| Crystal size/mm <sup>3</sup>                | 0.34 × 0.32 × 0.24                                              |
| Radiation                                   | CuK $\alpha$ ( $\lambda$ = 1.54184)                             |
| 2 $\Theta$ range for data collection/°      | 8.362 to 151.53                                                 |
| Index ranges                                | -10 ≤ h ≤ 10, -15 ≤ k ≤ 14, -26 ≤ l ≤ 26                        |
| Reflections collected                       | 19124                                                           |
| Independent reflections                     | 4520 [R <sub>int</sub> = 0.0205, R <sub>sigma</sub> = 0.0155]   |
| Data/restraints/parameters                  | 4520/0/289                                                      |
| Goodness-of-fit on F <sup>2</sup>           | 1.041                                                           |
| Final R indexes [I ≥ 2 $\sigma$ (I)]        | R <sub>1</sub> = 0.0257, wR <sub>2</sub> = 0.0682               |
| Final R indexes [all data]                  | R <sub>1</sub> = 0.0259, wR <sub>2</sub> = 0.0683               |
| Largest diff. peak/hole / e Å <sup>-3</sup> | 0.34/-0.33                                                      |
| Flack parameter                             | 0.008(4)                                                        |

---



## Gram-scale synthesis of AMA and the characterization data

**Table S2** Comparison of aziridines ring opening with amines between this method and conventional methods in synthesis of AMA

| aziridines                                                                          | amines                                                                              | equiv of amine | catalyst          | solvent | time | yield | references                         |
|-------------------------------------------------------------------------------------|-------------------------------------------------------------------------------------|----------------|-------------------|---------|------|-------|------------------------------------|
| 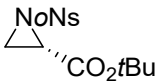   |    | 1.2 eq         | /                 | /       | 2 h  | 96 %  | this work                          |
|    |    | 2.0 eq         | Et <sub>3</sub> N | THF     | 16 h | 80 %  | 2015<br>Wright's work <sup>3</sup> |
|    |    | 2.0 eq         | Et <sub>3</sub> N | THF     | 16 h | 60 %  | 2016<br>Wright's work <sup>2</sup> |
|  |  | 2.0 eq         | Et <sub>3</sub> N | THF     | 20 h | 70 %  | 2017<br>Lei's work <sup>4</sup>    |

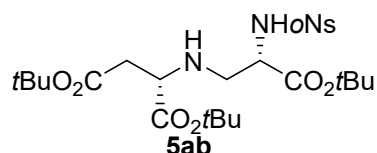

**di-tert-butyl ((S)-3-(tert-butoxy)-2-((2-nitrophenyl)sulfonamido)-3-oxopropyl)-L-aspartate (5ab):**

Mixture of amine **4b** (5.8877 g, 24 mmol) and aziridine **1a** (6.5668 g, 20 mmol) was stirred at r.t. for 2 h. The residue was directly purified by column chromatography on silica gel to give **5ab** (11.0457 g, 96 %, yellowish oil, turning into white solid after standing for long time).

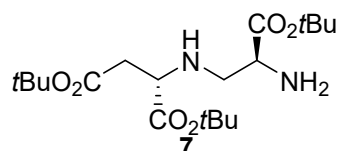

**di-tert-butyl ((S)-2-amino-3-(tert-butoxy)-3-oxopropyl)-L-aspartate (7):**

To a solution of compound **5ab** (9.1786 g, 16 mmol) in acetonitrile (80 mL) was added PhSNa (7.4010 g, 56 mmol). After stirring at r.t. for 30 min, the reaction mixture was diluted with ethyl acetate (80 mL), and quenched with water (80 mL). The water layer was further extracted with ethyl acetate (80 mL). The combined organic layers were dried over anhydrous Na<sub>2</sub>SO<sub>4</sub>, and the filtrate was evaporated under reduced pressure. The residue was purified by silica gel column chromatography to afford compound **7** (5.2968 g, 85 %, yellowish oil). <sup>1</sup>H NMR (400 MHz,

Chloroform-*d*)  $\delta$  3.43 (dd,  $J = 7.3, 5.7$  Hz, 1H), 3.37 (dd,  $J = 7.0, 4.1$  Hz, 1H), 2.87 (dd,  $J = 11.9, 7.0$  Hz, 1H), 2.73 (dd,  $J = 11.9, 4.2$  Hz, 1H), 2.57 (dd,  $J = 15.7, 5.7$  Hz, 1H), 2.44 (dd,  $J = 15.7, 7.3$  Hz, 1H), 2.09 (s, 3H), 1.49 – 1.40 (m, 27H).  $^{13}\text{C}$  NMR (101 MHz, Chloroform-*d*)  $\delta$  173.94, 172.91, 170.26, 81.51, 81.31, 80.99, 58.73, 55.19, 51.30, 39.65, 28.17, 28.15, 28.13. HRMS: calculated for  $\text{C}_{19}\text{H}_{37}\text{N}_2\text{O}_6\text{S}^+$   $[\text{M}+\text{H}]^+$  389.2646, found 389.2654.

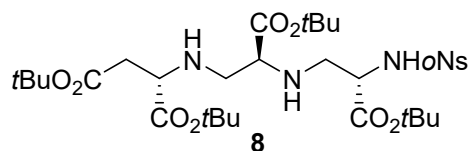

**di-tert-butyl ((S)-3-(tert-butoxy)-2-(((S)-3-(tert-butoxy)-2-((2-nitrophenyl)sulfonamido)-3-oxopropyl)amino)-3-oxopropyl)-L-aspartate (8):**

Mixture of amine **7** (5.2968 g, 13.6336 mmol) and aziridine **1a** (4.3422 g, 13.2246 mmol) was stirred at r.t. for 2 h. The residue was directly purified by column chromatography on silica gel to give **8** (7.8283g, 80 % based on amine **7**, yellowish oil).  $^1\text{H}$  NMR (400 MHz, Chloroform-*d*)  $\delta$  8.08 – 8.03 (m, 1H), 7.89 – 7.83 (m, 1H), 7.74 – 7.64 (m, 2H), 4.10 (t,  $J = 4.6$  Hz, 1H), 3.42 (t,  $J = 6.4$  Hz, 1H), 3.20 – 3.08 (m, 2H), 2.86 – 2.66 (m, 3H), 2.58 (dd,  $J = 16.0, 6.4$  Hz, 1H), 2.51 (dd,  $J = 15.9, 6.5$  Hz, 1H), 1.51 – 1.38 (m, 27H), 1.26 (s, 9H).  $^{13}\text{C}$  NMR (101 MHz, Chloroform-*d*)  $\delta$  172.75, 172.67, 170.27, 169.09, 147.87, 134.81, 133.42, 132.73, 130.56, 125.42, 82.62, 81.68, 81.47, 80.89, 62.31, 58.63, 57.75, 50.25, 49.99, 39.44, 28.15, 28.11, 28.09, 27.80. HRMS: calculated for  $\text{C}_{32}\text{H}_{53}\text{N}_4\text{O}_{12}\text{S}^+$   $[\text{M}+\text{H}]^+$  717.3375, found 717.3394.

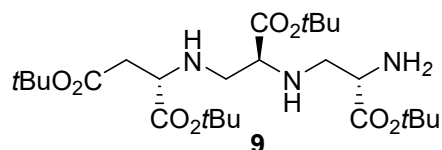

**di-tert-butyl ((S)-2-(((S)-2-amino-3-(tert-butoxy)-3-oxopropyl)amino)-3-(tert-butoxy)-3-oxopropyl)-L-aspartate (9):**

To a solution of compound **8** (5.3764 g, 7.5 mmol) in dimethylformamide (20 mL) were added PhSNa (3.4692 g, 26.25 mmol). After stirring at r.t. for 30 min, the reaction mixture was diluted with ethyl acetate (150 mL), and quenched with water (150 mL). The water layer was further extracted with ethyl acetate (150 mL). The combined organic layers were washed with water (150 mL  $\times$  5) and brine (150 mL), and dried over anhydrous  $\text{Na}_2\text{SO}_4$ . Then the filtrate was evaporated under reduced pressure. The residue was purified by silica gel column chromatography to afford compound **9** (3.3163 g, 83 %, yellowish oil).  $^1\text{H}$  NMR (400 MHz, Chloroform-*d*)  $\delta$  3.41 (t,  $J = 6.5$  Hz, 1H), 3.38 (dd,  $J = 7.2, 4.5$  Hz, 1H), 3.19 (dd,  $J = 7.4, 4.9$  Hz, 1H), 2.81 – 2.65 (m, 4H), 2.55 (dd,  $J = 15.8, 6.2$  Hz, 1H), 2.46 (dd,  $J = 15.8, 6.7$  Hz, 1H), 2.01 (s, 4H), 1.47 – 1.34 (m, 36H).  $^{13}\text{C}$  NMR (101 MHz, Chloroform-*d*)  $\delta$  174.03, 173.18, 172.74, 170.26, 81.41, 81.37, 81.28, 80.90, 62.29, 58.62, 55.43, 51.34, 50.38, 39.56, 28.20, 28.17, 28.14, 28.13. HRMS: calculated for  $\text{C}_{26}\text{H}_{50}\text{N}_3\text{O}_8\text{S}^+$   $[\text{M}+\text{H}]^+$  532.3592, found 532.3609.

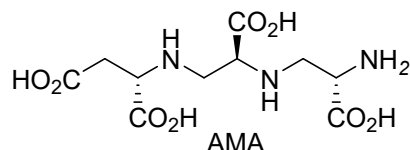

**((S)-2-(((S)-2-amino-2-carboxyethyl)amino)-2-carboxyethyl)-L-aspartic acid (AMA):**

To a solution of compound **9** (3.3163 g, 6.2373 mmol) in dichloromethane (100 mL) were added

anisole (4.080 mL, 37.4238 mmol) and trifluoromethanesulfonic acid (2.745 mL, 31.1865 mmol) at 0 °C. After stirring at 0 °C for 30 min, the reaction was allowed to warm to r.t. and stir for 1 h. Then the reaction was quenched with a solution of NaHCO<sub>3</sub> (3.6680 g, 43.6611 mmol) in water (100 mL) at 0 °C and stirred for an additional 1 h. The water layer was washed with dichloromethane (100 mL × 3) and purified by ion-exchange chromatography to afford AMA (1.0975 g, 57 %, white solid).<sup>3</sup> <sup>1</sup>H NMR (600 MHz, Deuterium Oxide) δ 3.89 – 3.83 (m, 2H), 3.43 (dd, *J* = 9.8, 4.2 Hz, 1H), 3.31 (dd, *J* = 12.9, 4.3 Hz, 1H), 3.29 (dd, *J* = 13.5, 5.8 Hz, 1H), 3.16 (dd, *J* = 12.9, 9.8 Hz, 1H), 2.89 (dd, *J* = 13.5, 3.9 Hz, 1H), 2.84 (dd, *J* = 17.5, 3.7 Hz, 1H), 2.71 (dd, *J* = 17.6, 9.4 Hz, 1H). <sup>13</sup>C NMR (151 MHz, Deuterium Oxide) δ 177.43, 177.34, 173.26, 173.12, 59.79, 59.30, 54.54, 47.95, 47.06, 35.78. HRMS: calculated for C<sub>10</sub>H<sub>16</sub>N<sub>3</sub>O<sub>8</sub>S<sup>-</sup> [M-H]<sup>-</sup> 306.0943, found 306.0955.

## References

1. C. A. Olsen, C. Christensen, B. Nielsen, M. M. Farah, M. Witt, R. P. Clausen, J. L. Kristensen, H. Franzyk and J. W. Jaroszewski, *Org. Lett.*, 2006, **8**, 3371-3374.
2. S. A. Albu, K. Koteva, A. M. King, S. Al-Karmi, G. D. Wright and A. Capretta, *Angew. Chem. Int. Edit.*, 2016, **55**, 13259-13262. The NMR data of **5ab** was in accordance with the data in the page S18 in the supporting information of the reference. The reaction data was also from the page S18 in the supporting information of the reference.
3. K. Koteva, A. M. King, A. Capretta and G. D. Wright, *Angew. Chem. Int. Edit.*, 2016, **55**, 2210-2212.
4. J. Zhang, S. S. Wang, Y. J. Bai, Q. Q. Guo, J. Zhou and X. G. Lei, *J. Org. Chem.*, 2017, **82**, 13643-13648.

# Copies of $^1\text{H}$ NMR, $^{13}\text{C}$ NMR spectra

$^1\text{H}$  NMR (400 MHz, Chloroform-*d*) of compound **1a**

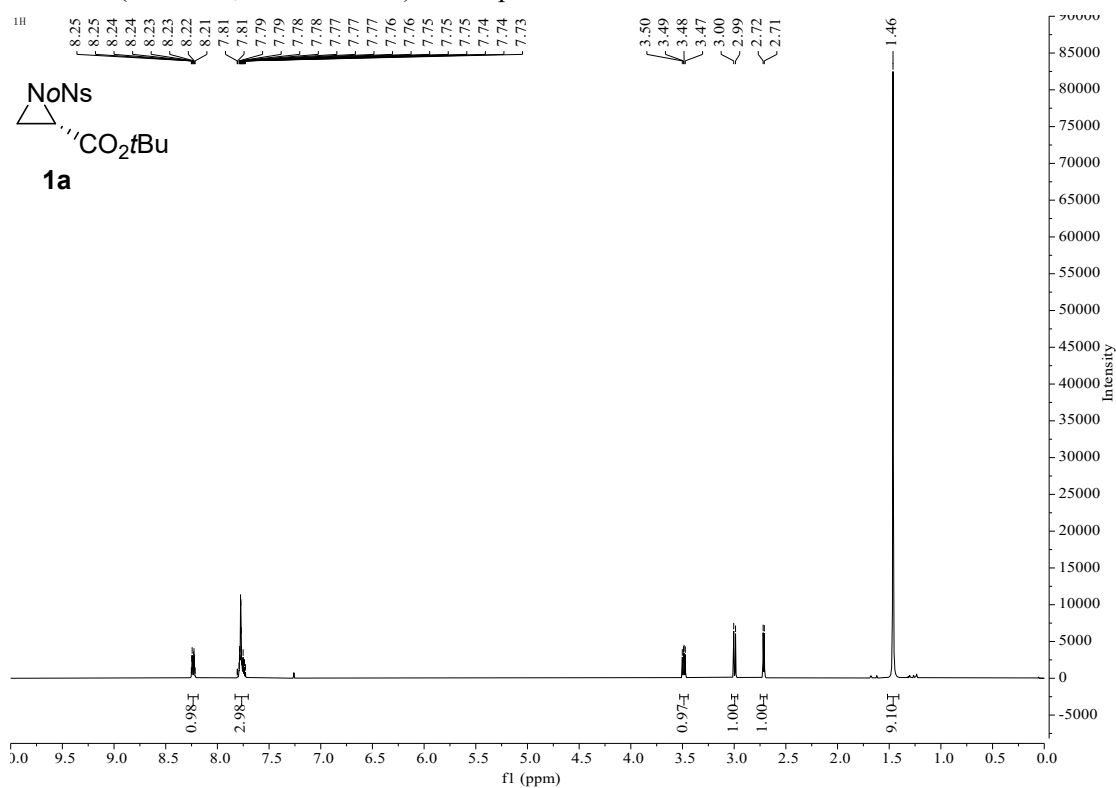

$^{13}\text{C}$  NMR (101 MHz, Chloroform-*d*) of compound **1a**

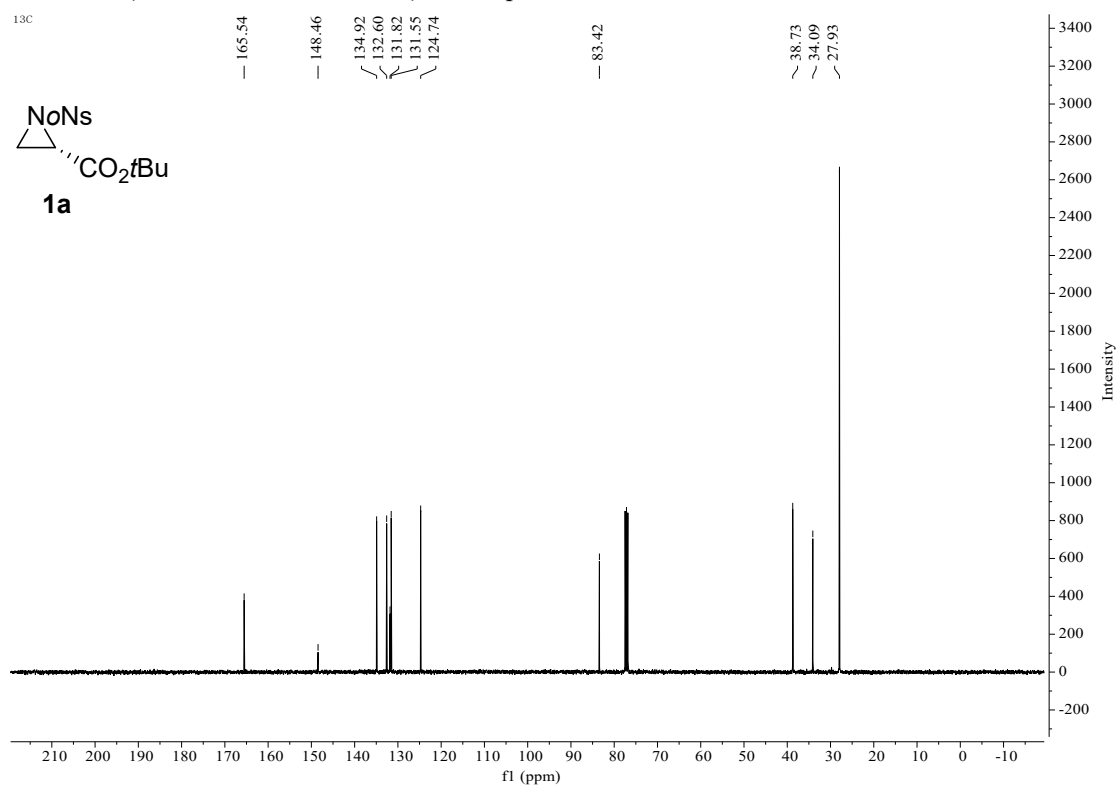

<sup>1</sup>H NMR (600 MHz, Chloroform-*d*) of compound **1b**

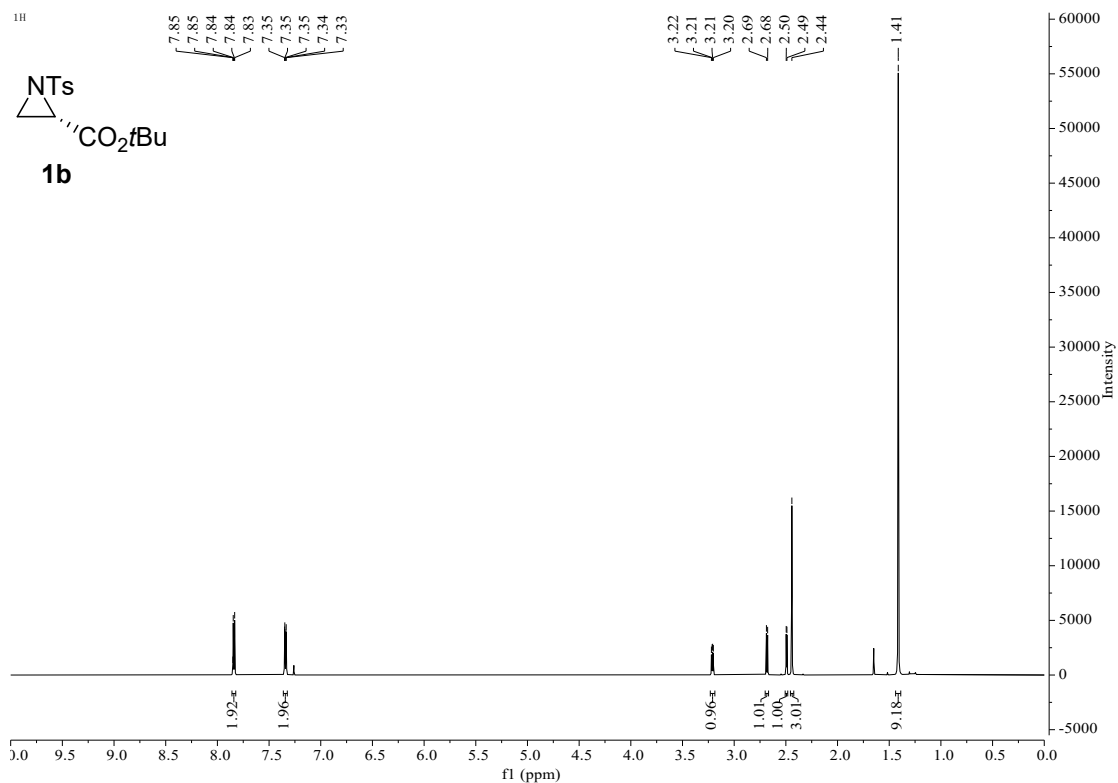

<sup>13</sup>C NMR (151 MHz, Chloroform-*d*) of compound **1b**

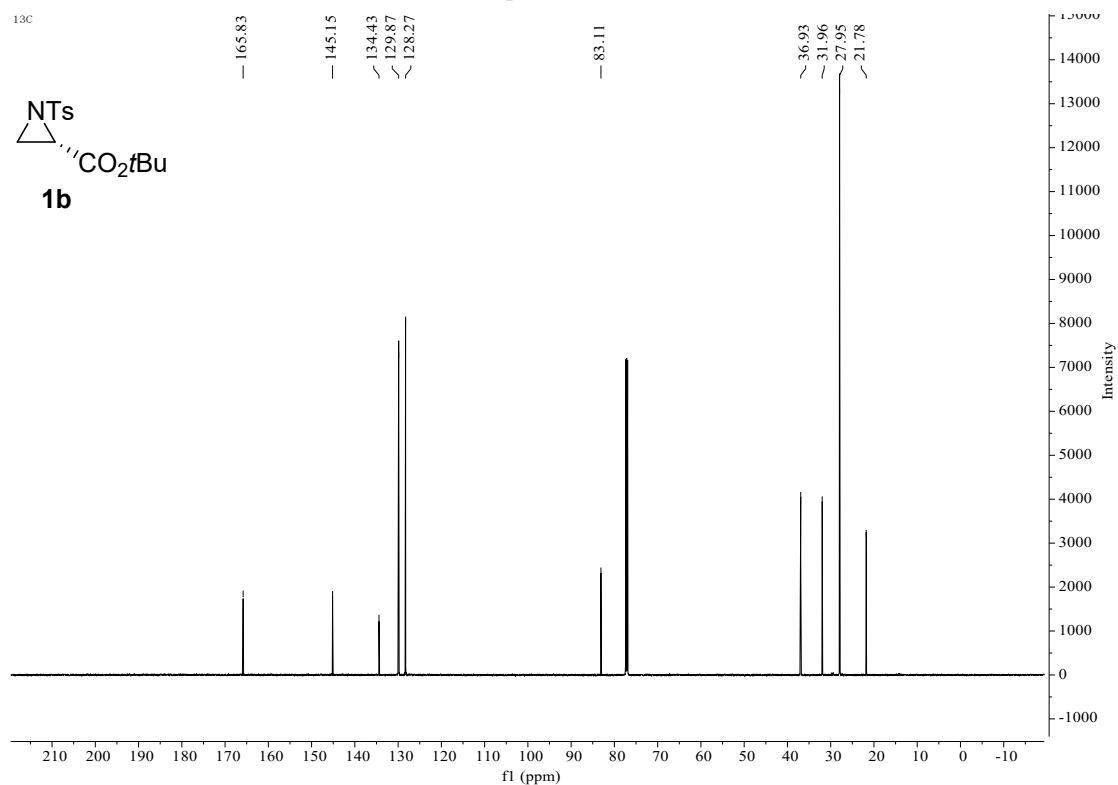

<sup>1</sup>H NMR (400 MHz, Chloroform-*d*) of compound **1c**

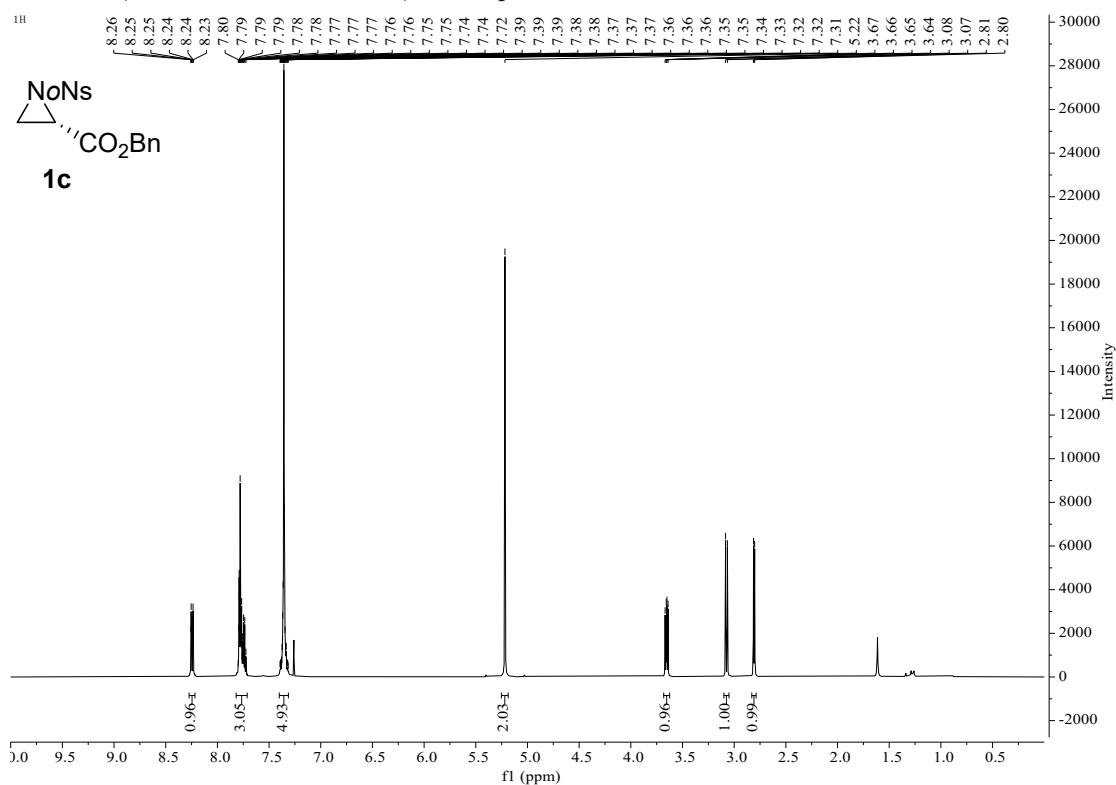

<sup>13</sup>C NMR (101 MHz, Chloroform-*d*) of compound **1c**

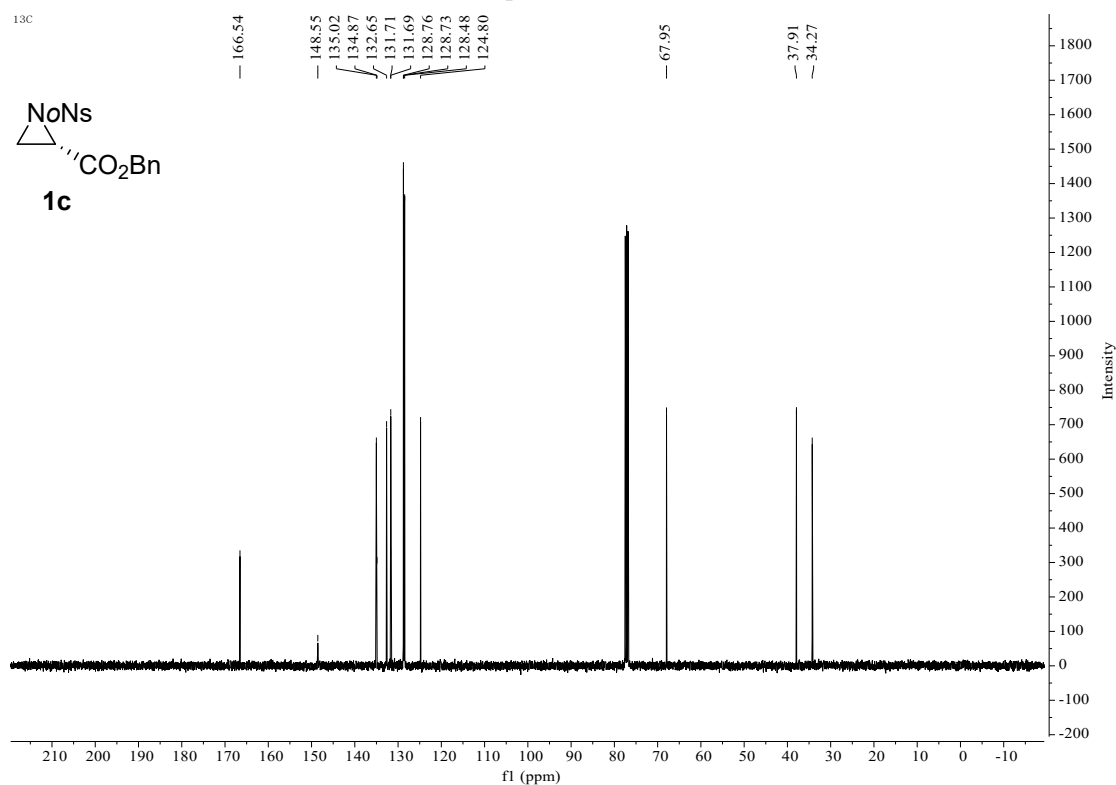

<sup>1</sup>H NMR (400 MHz, DMSO-*d*<sub>6</sub>) of compound **3aa**

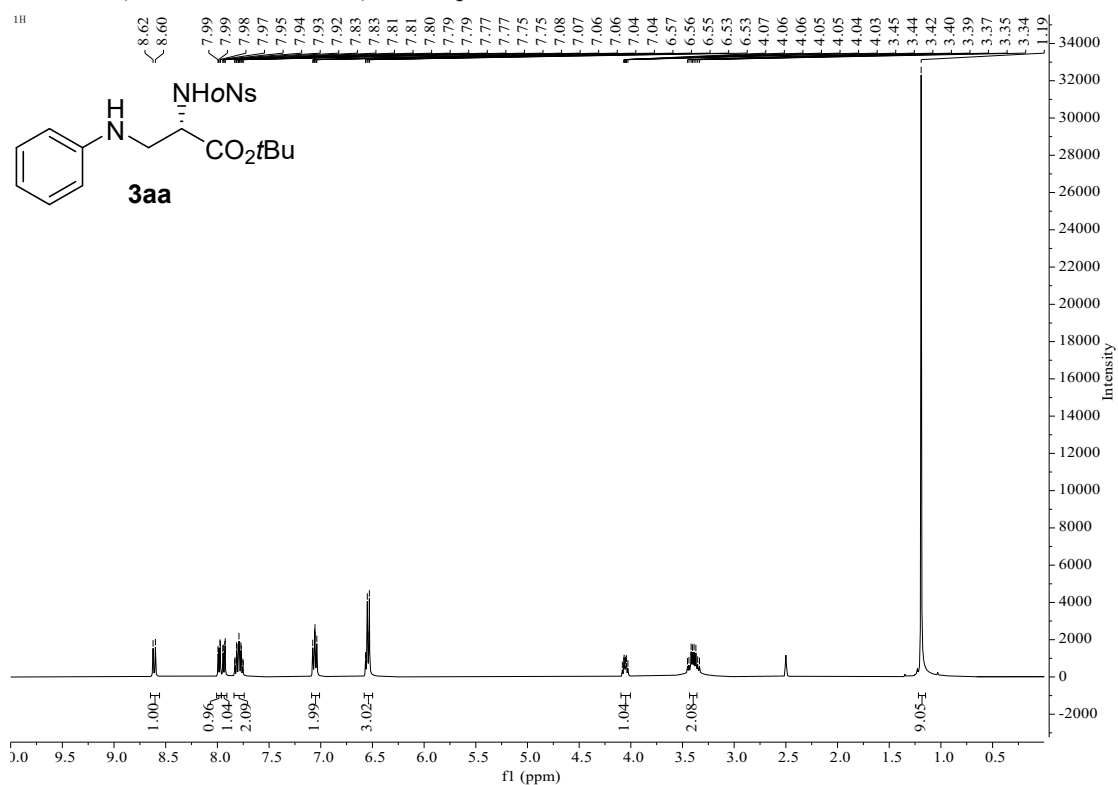

<sup>13</sup>C NMR (101 MHz, DMSO-*d*<sub>6</sub>) of compound **3aa**

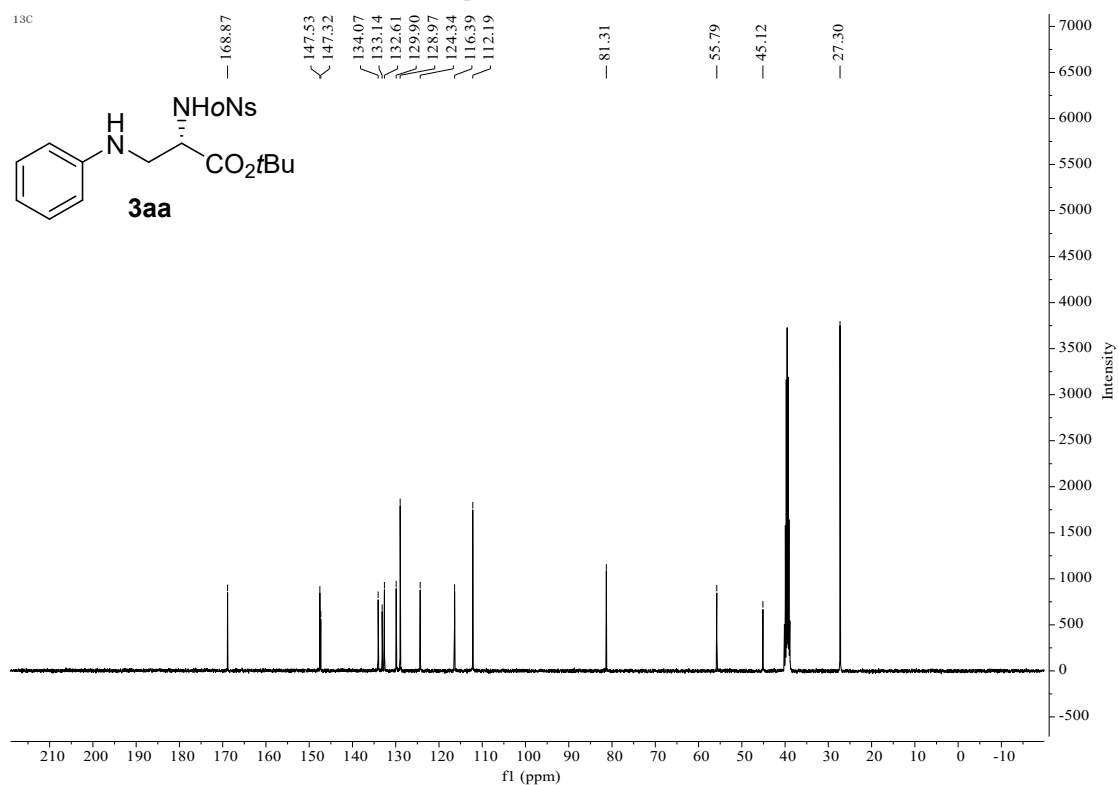

<sup>1</sup>H NMR (600 MHz, Chloroform-*d*) of compound **3ba**

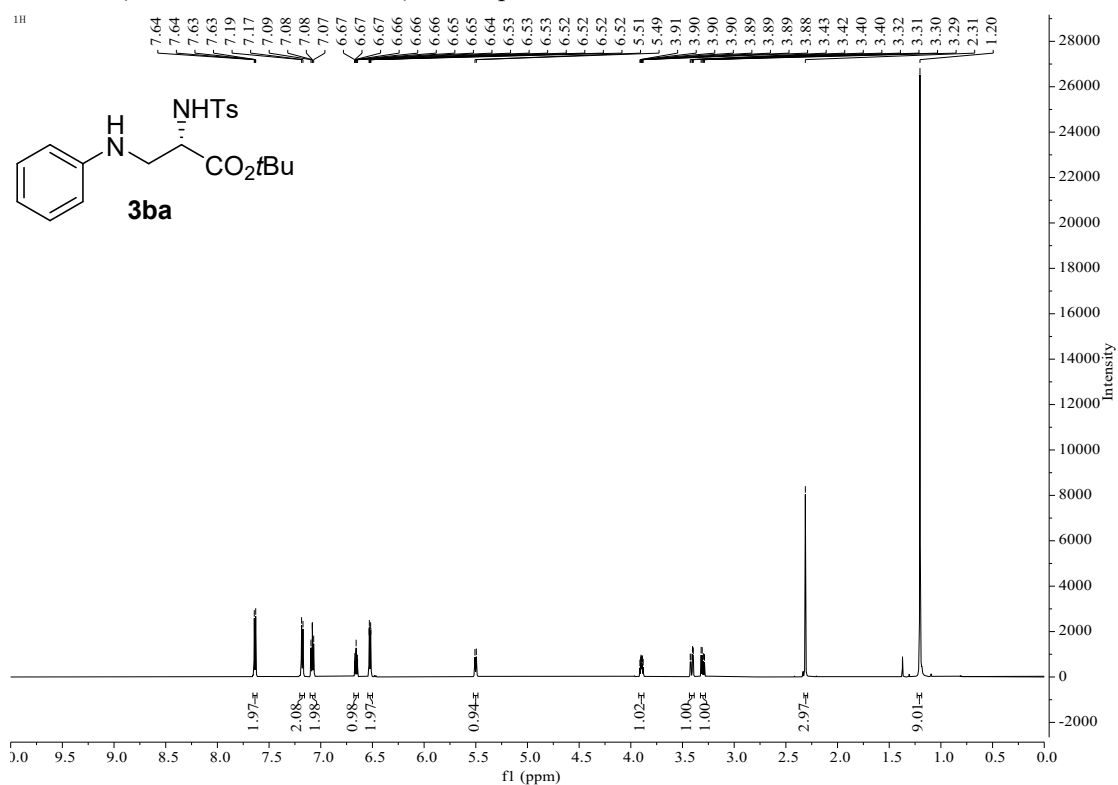

<sup>13</sup>C NMR (151 MHz, Chloroform-*d*) of compound **3ba**

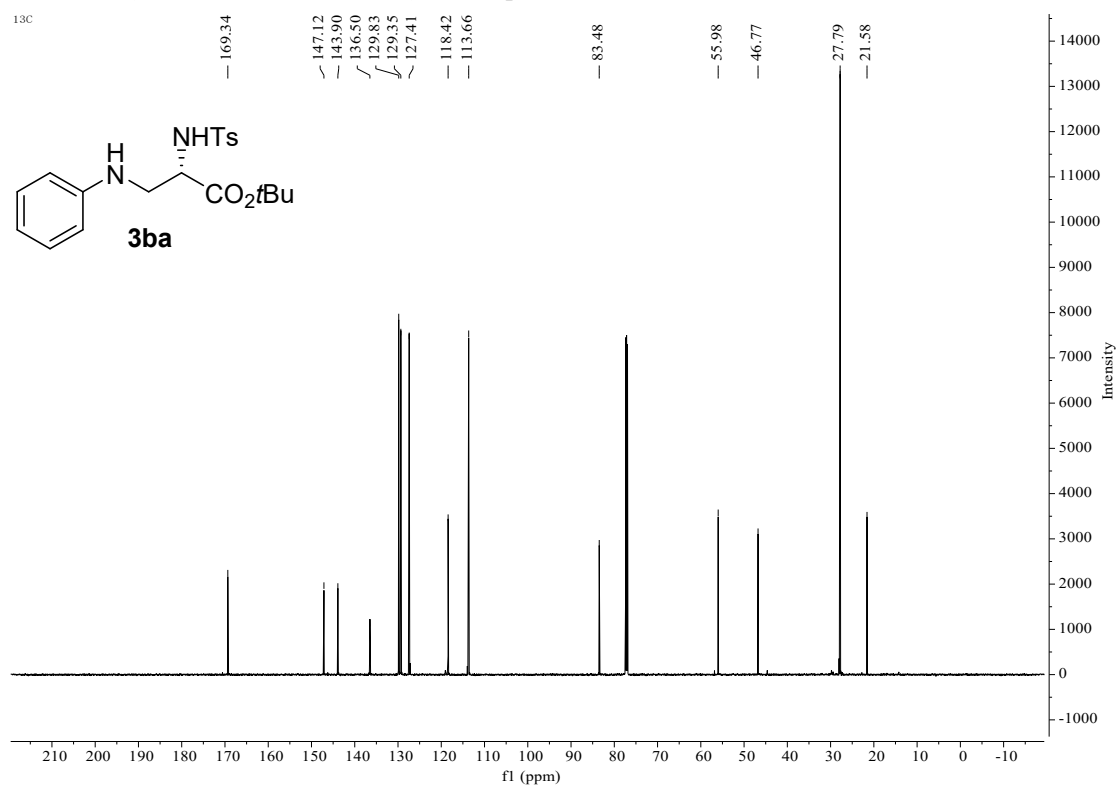



<sup>1</sup>H NMR (400 MHz, Chloroform-*d*) of compound **3ab**

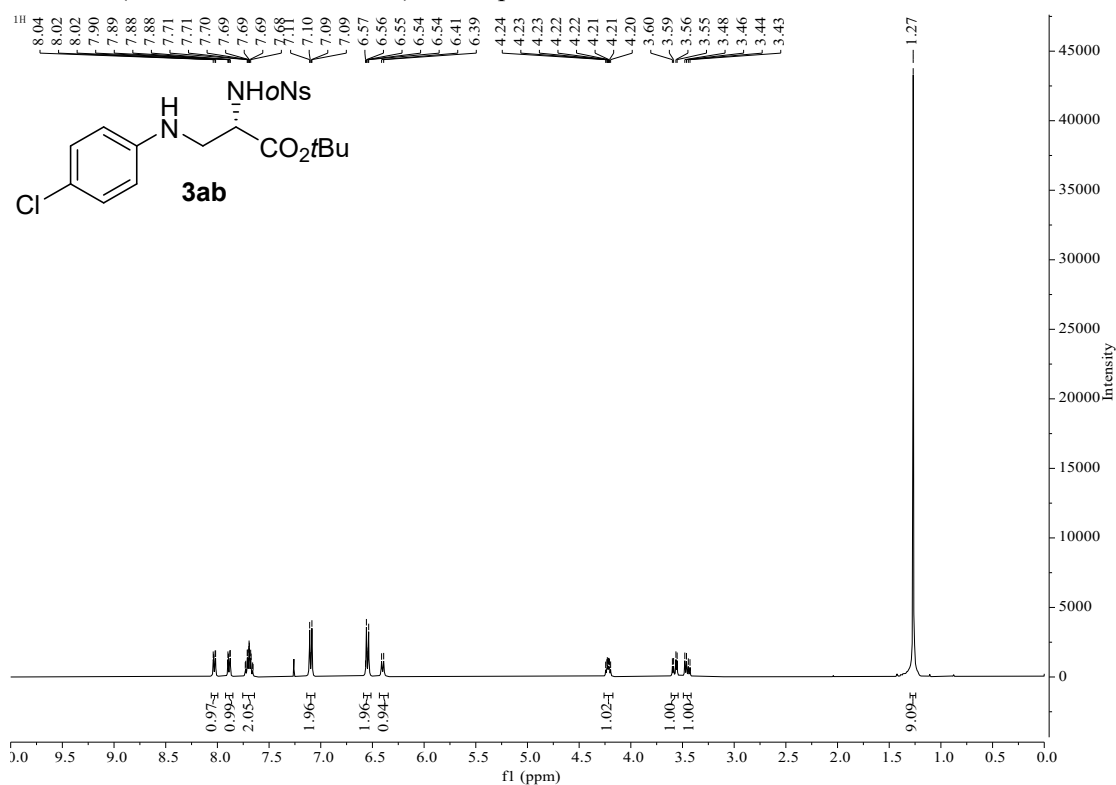

<sup>13</sup>C NMR (101 MHz, Chloroform-*d*) of compound **3ab**

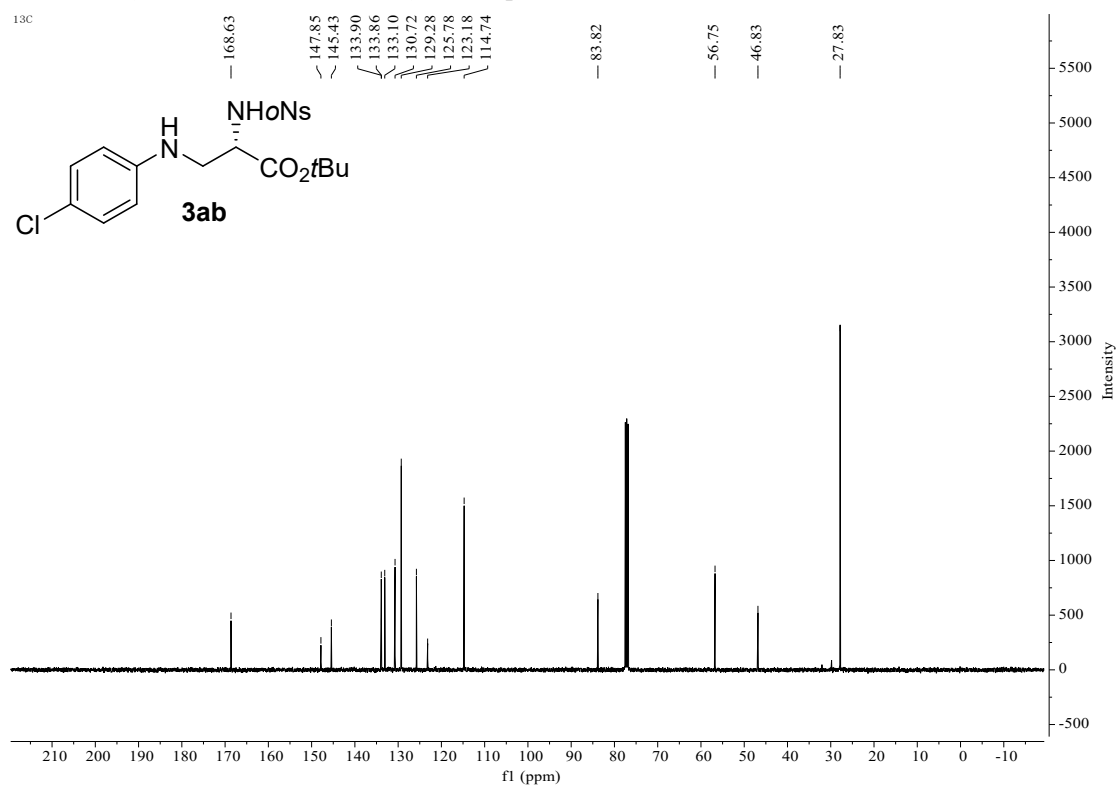

<sup>1</sup>H NMR (400 MHz, Chloroform-*d*) of compound **3ac**

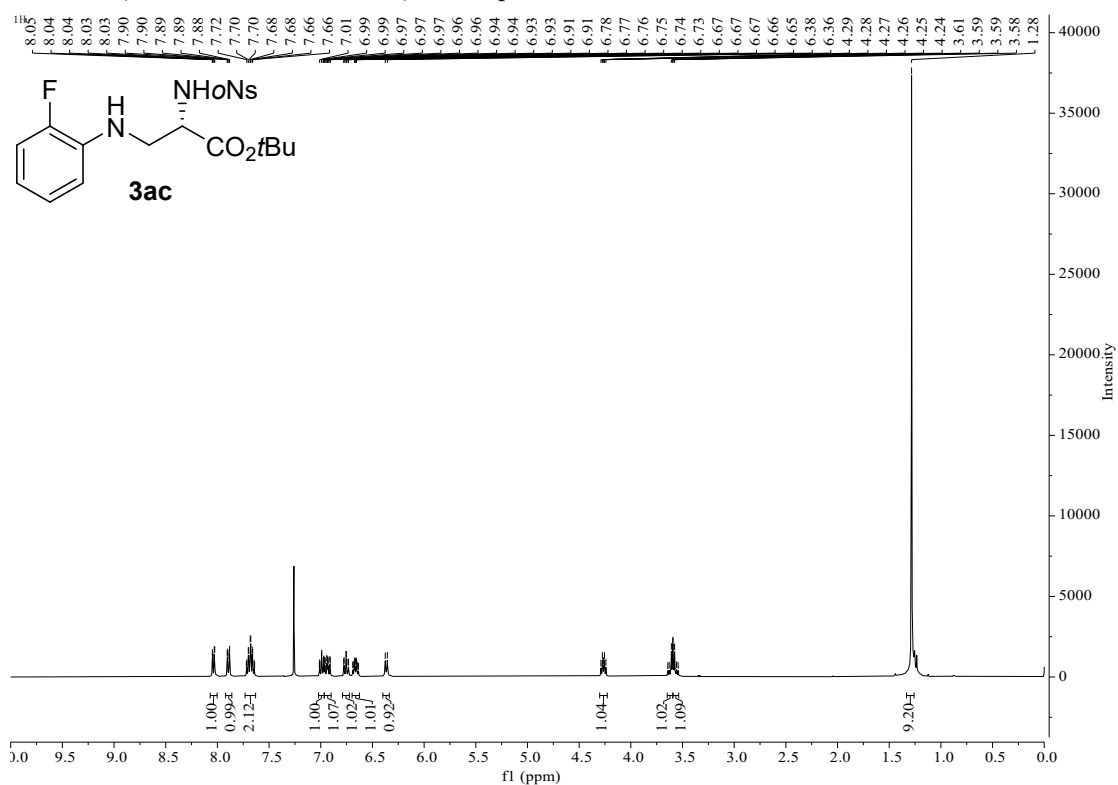

<sup>13</sup>C NMR (101 MHz, Chloroform-*d*) of compound **3ac**

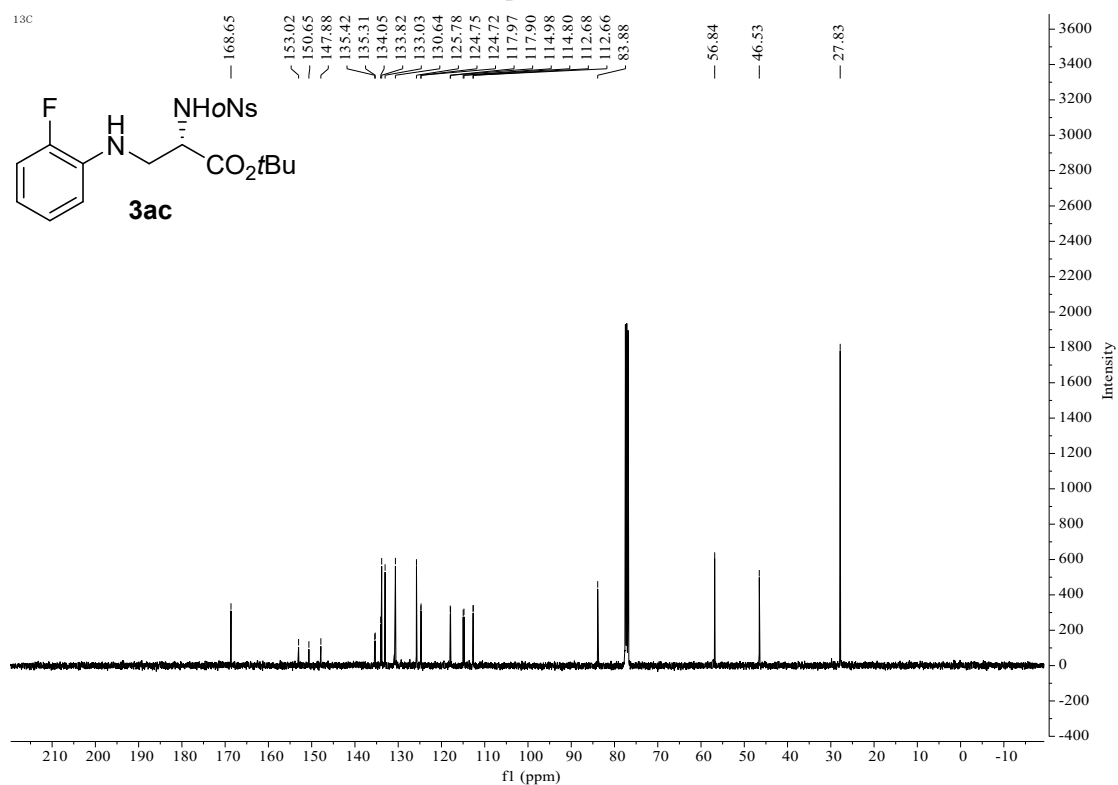

<sup>1</sup>H NMR (400 MHz, Chloroform-*d*) of compound **3ad**

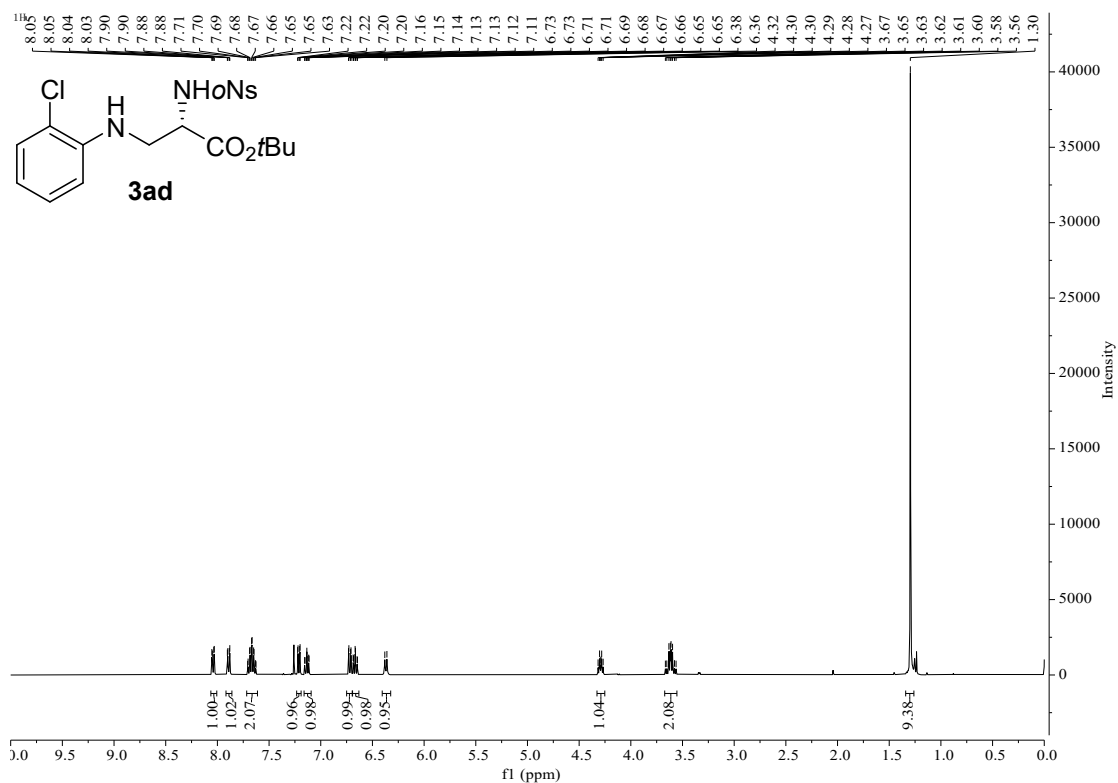

<sup>13</sup>C NMR (101 MHz, Chloroform-*d*) of compound **3ad**

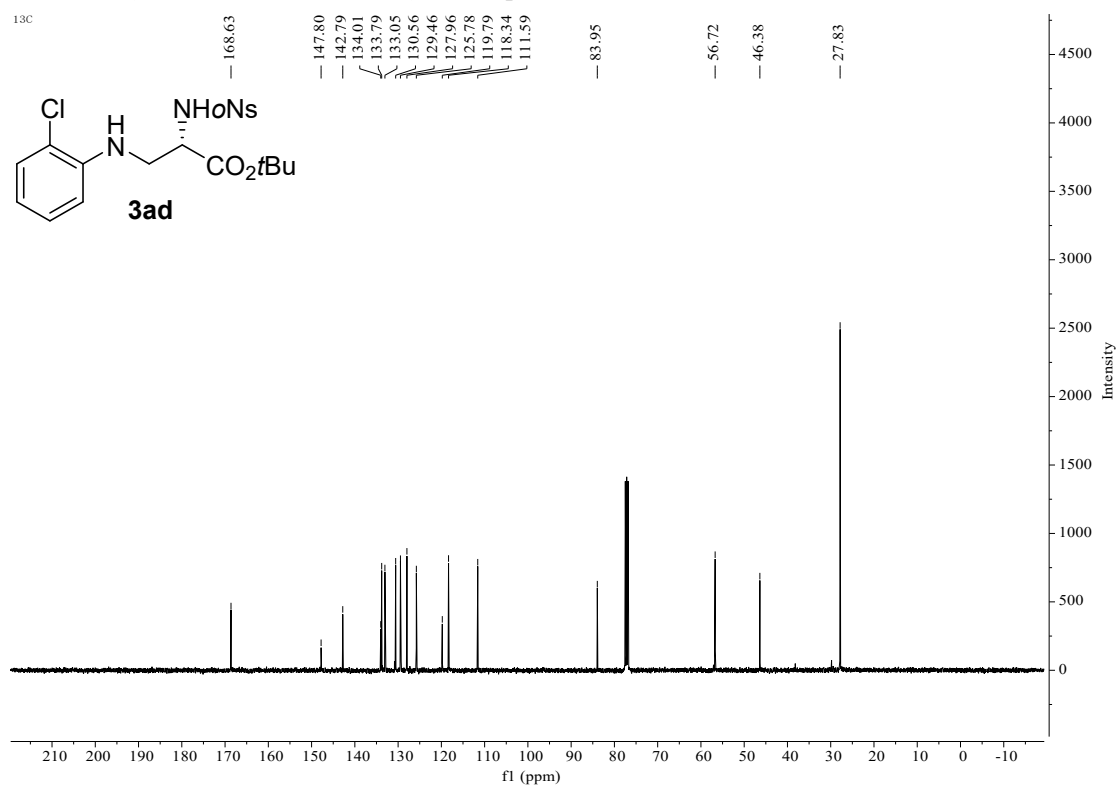

<sup>1</sup>H NMR (400 MHz, Chloroform-*d*) of compound **3ae**

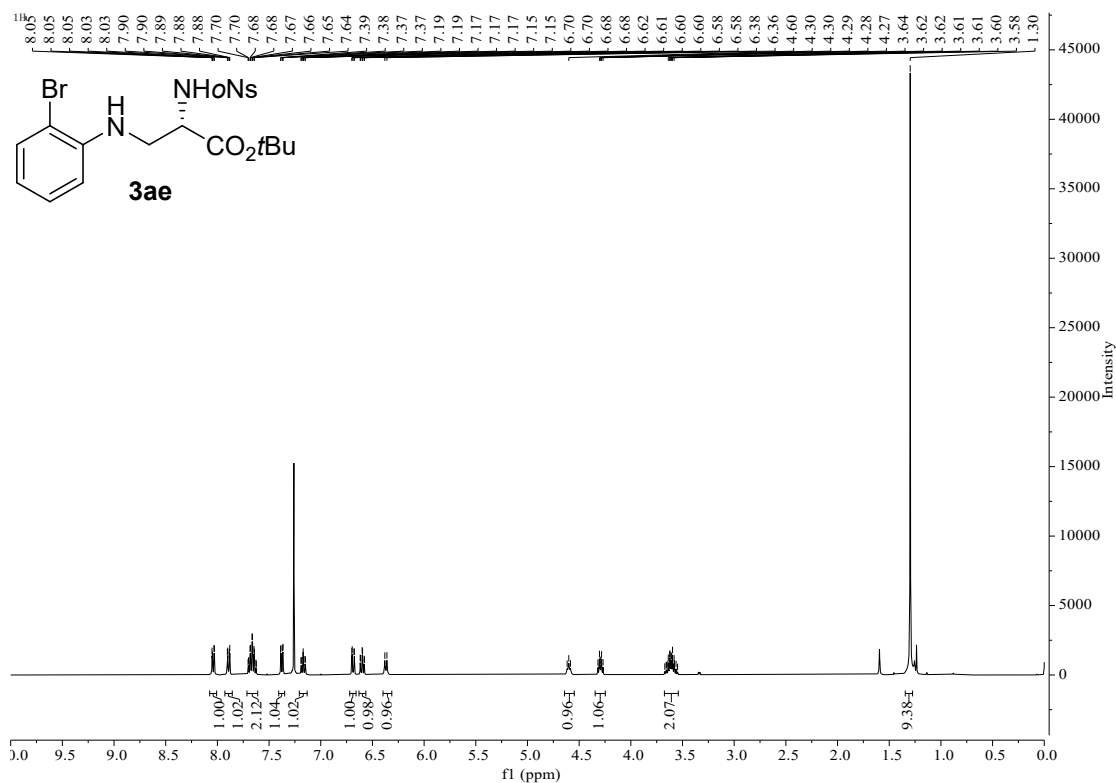

<sup>13</sup>C NMR (101 MHz, Chloroform-*d*) of compound **3ae**

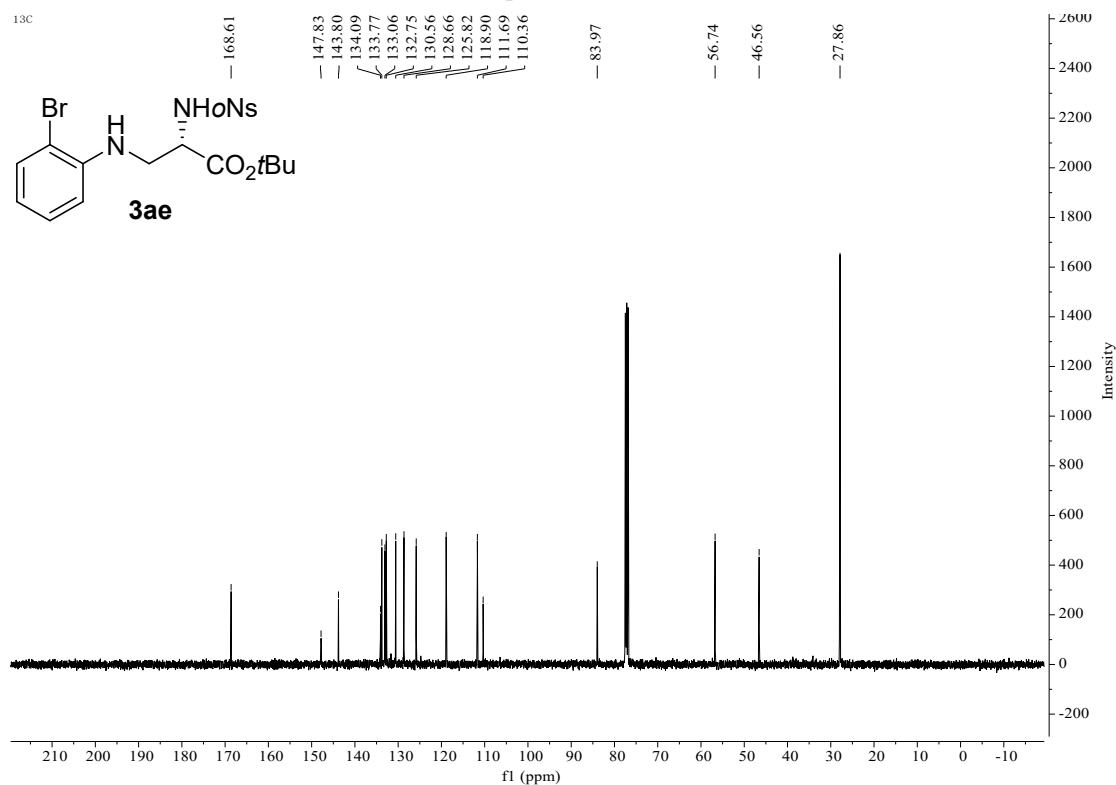

<sup>1</sup>H NMR (400 MHz, Chloroform-*d*) of compound **3af**

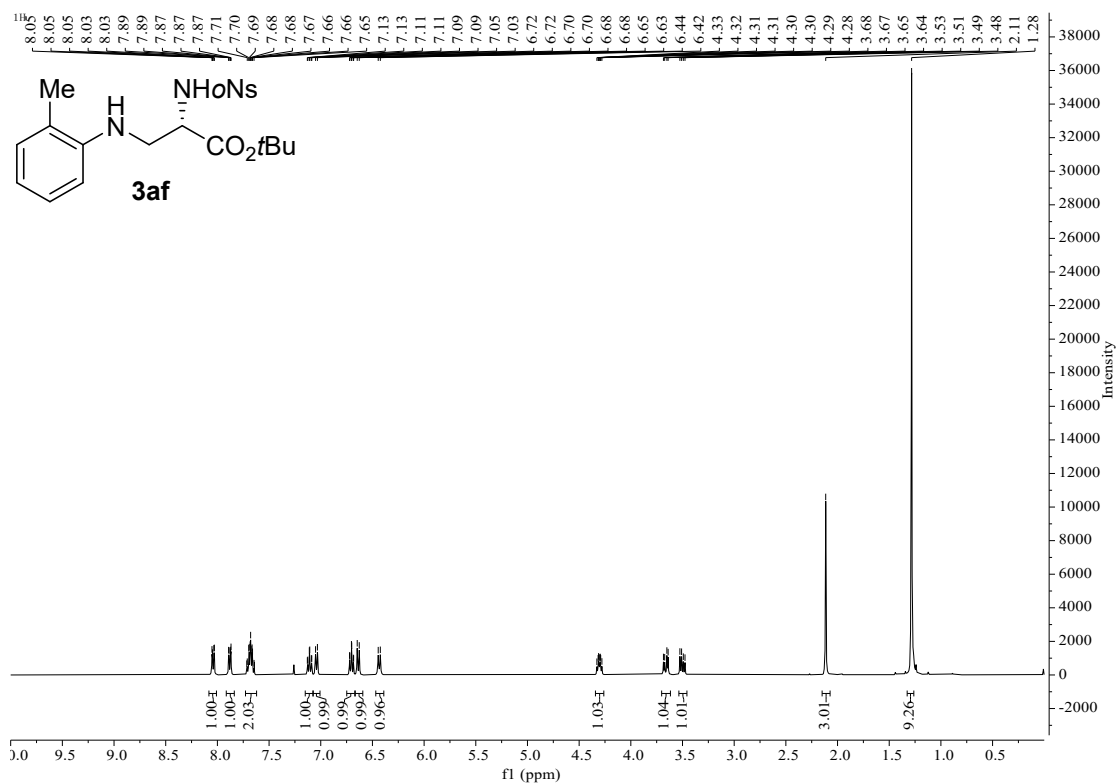

<sup>13</sup>C NMR (101 MHz, Chloroform-*d*) of compound **3af**

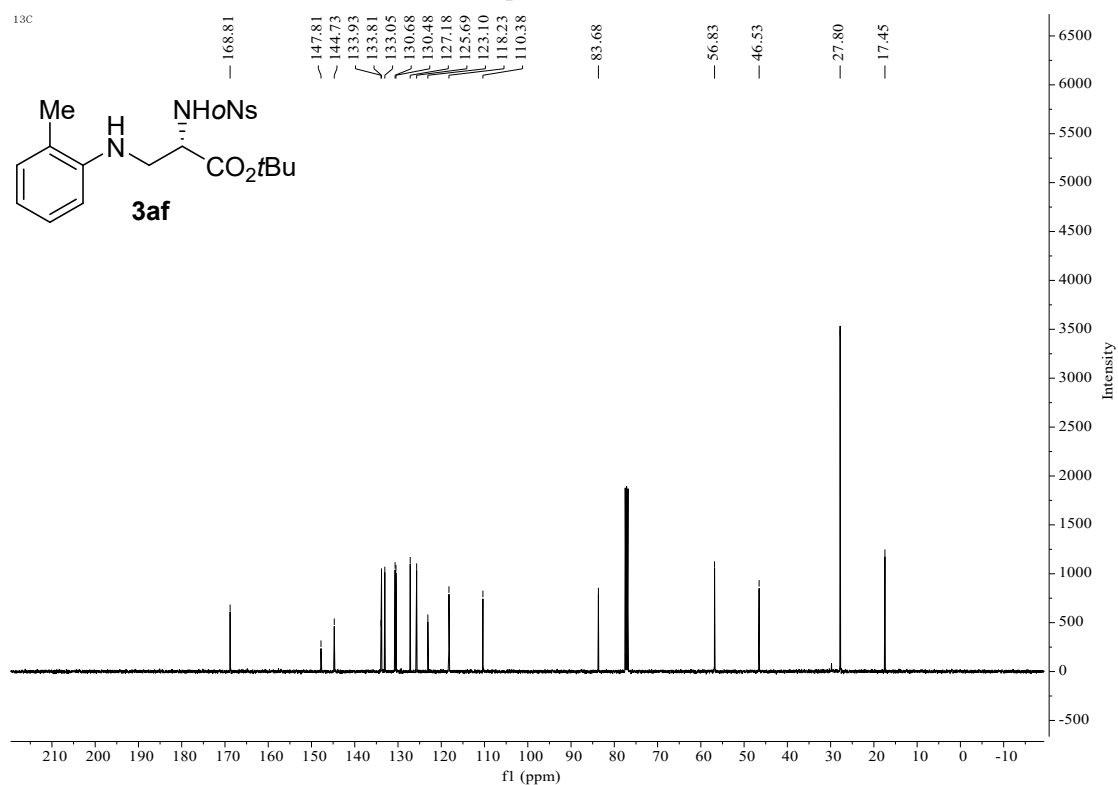

<sup>1</sup>H NMR (400 MHz, Chloroform-*d*) of compound **3ag**

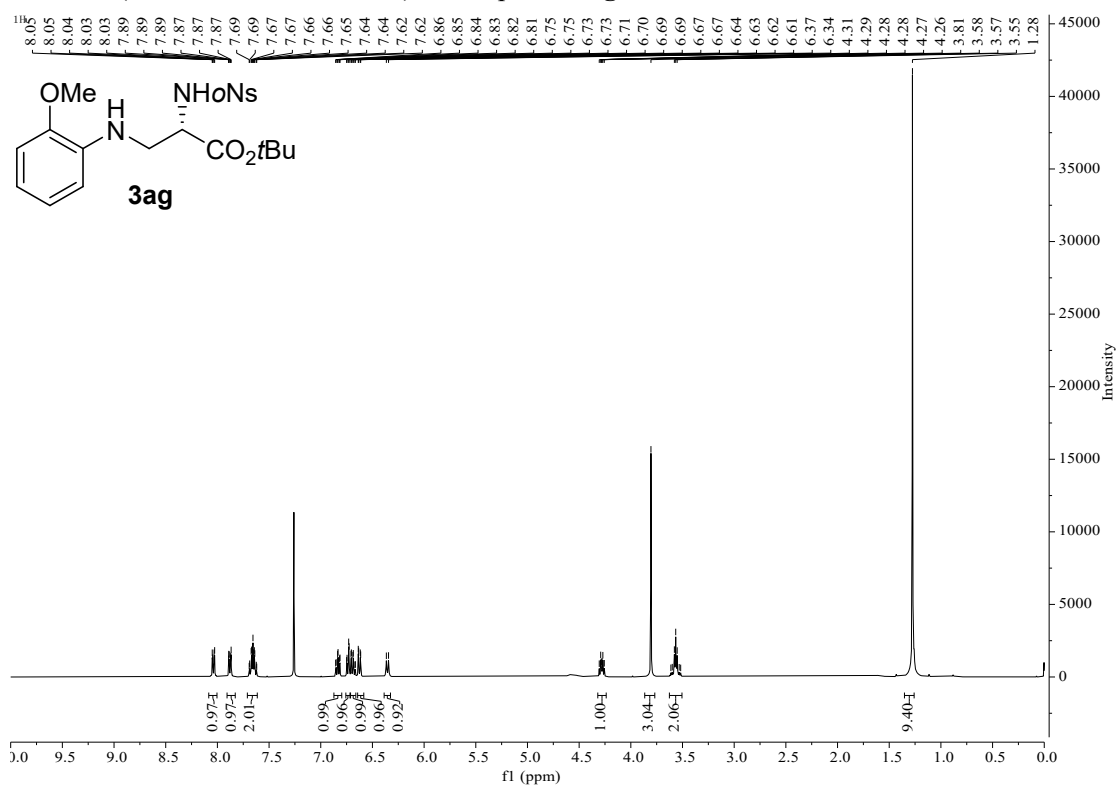

<sup>13</sup>C NMR (101 MHz, Chloroform-*d*) of compound **3ag**

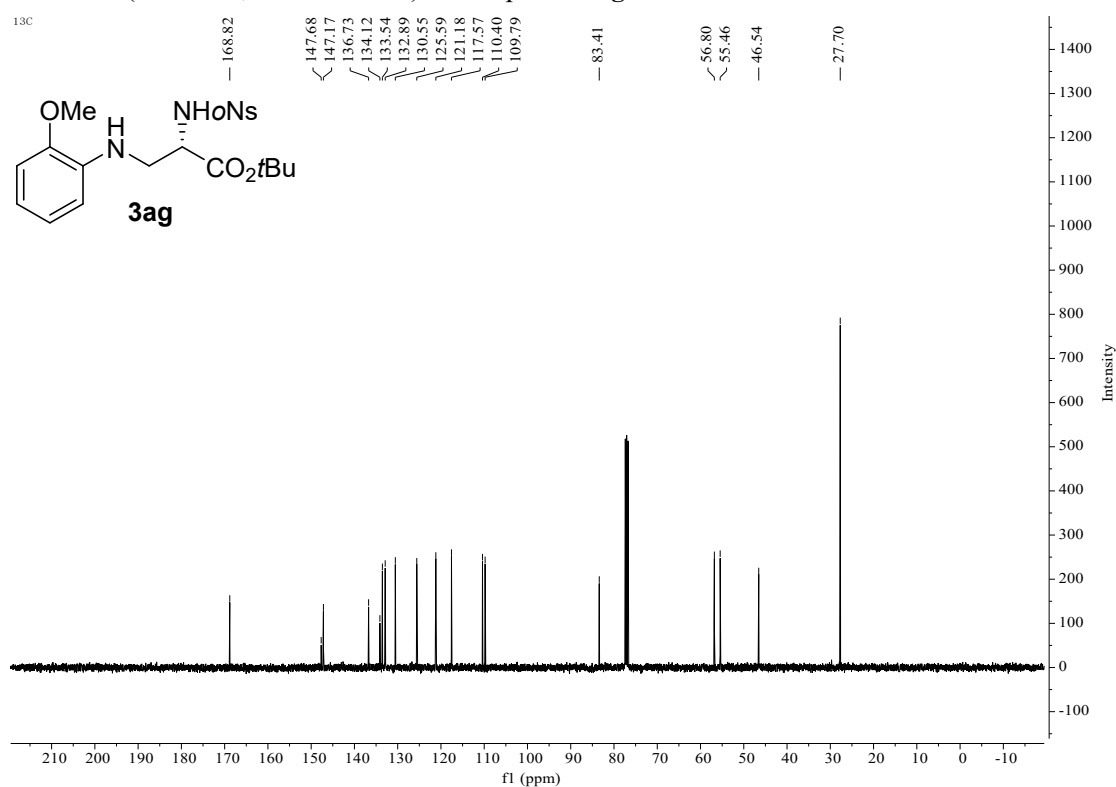

<sup>1</sup>H NMR (400 MHz, Chloroform-*d*) of compound **3ah**

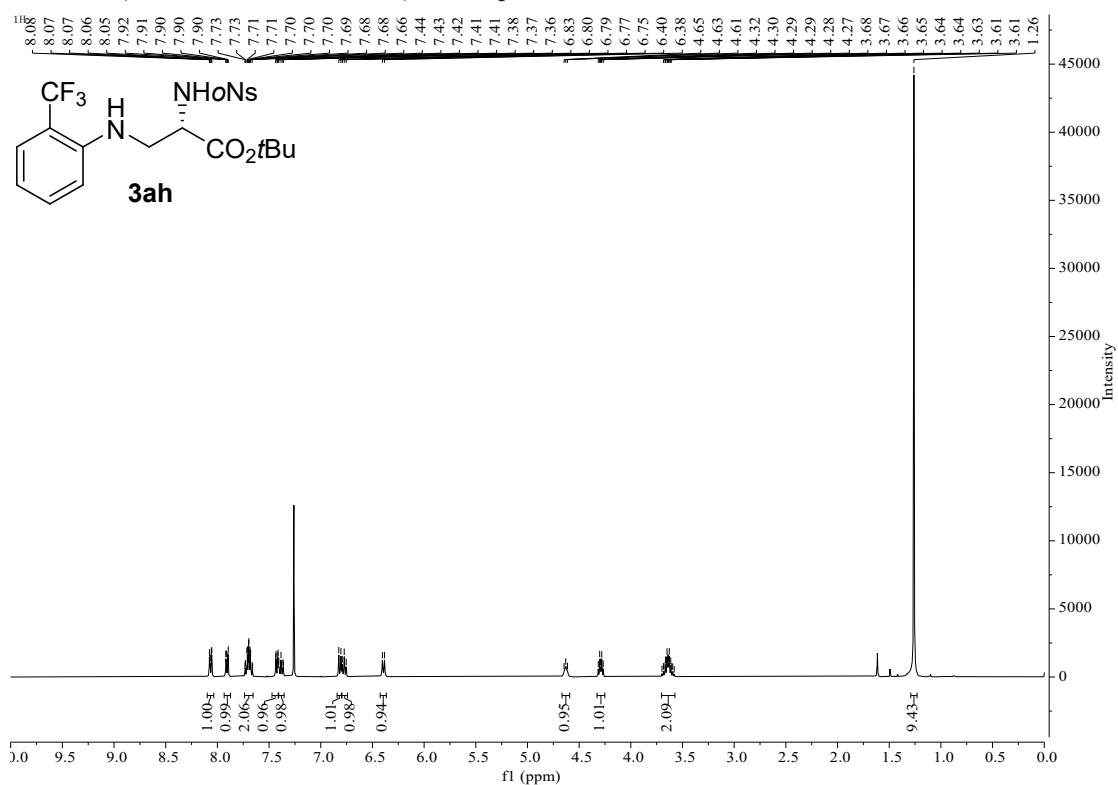

<sup>13</sup>C NMR (101 MHz, Chloroform-*d*) of compound **3ah**

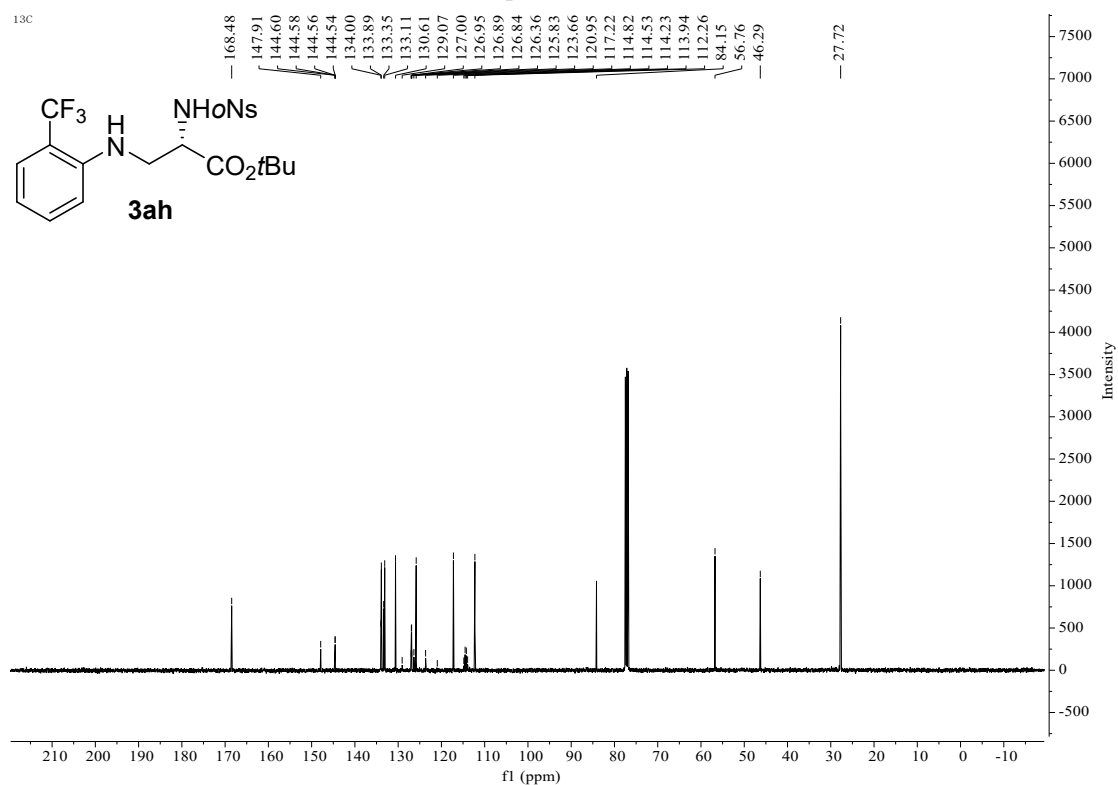

<sup>1</sup>H NMR (400 MHz, Chloroform-*d*) of compound **3ai**

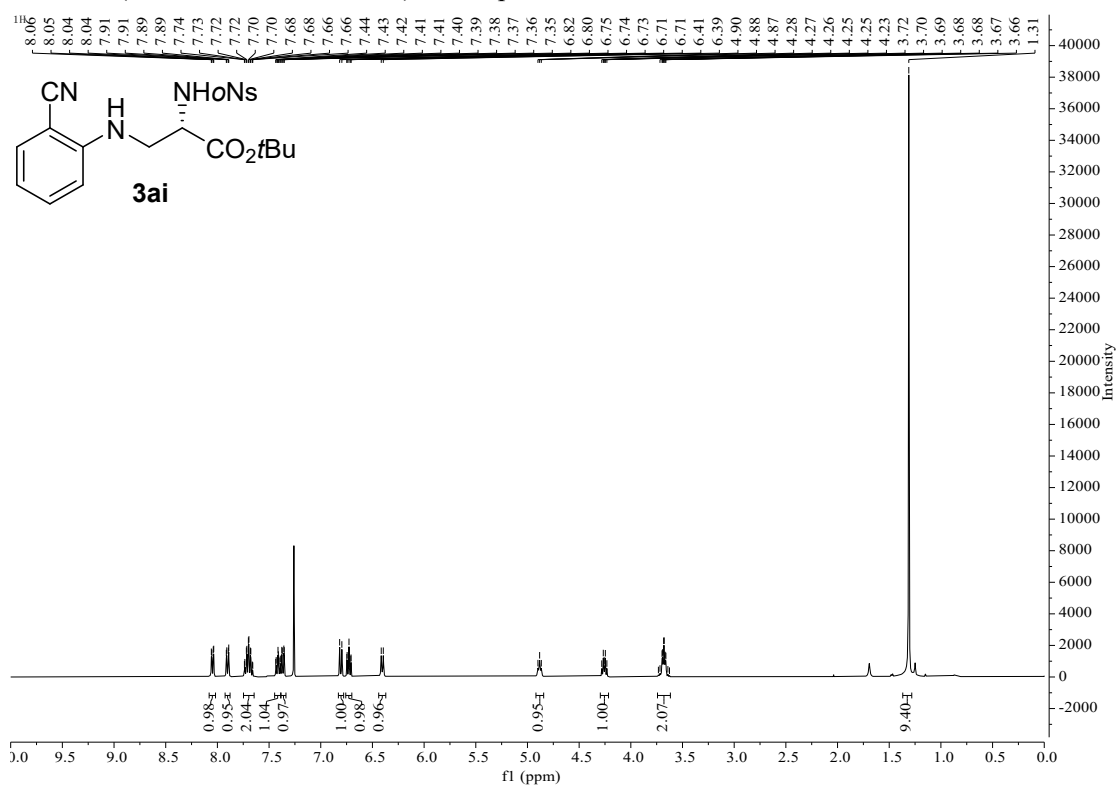

<sup>13</sup>C NMR (101 MHz, Chloroform-*d*) of compound **3ai**

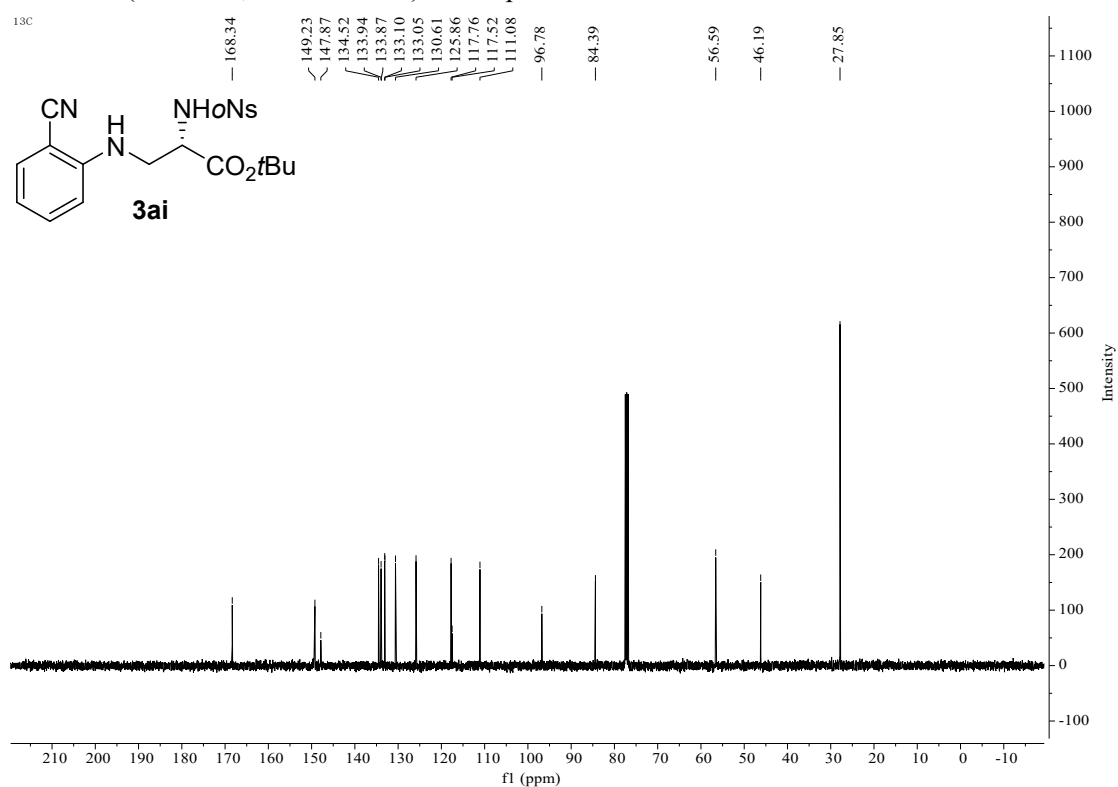



<sup>1</sup>H NMR (400 MHz, Chloroform-*d*) of compound **3aj**

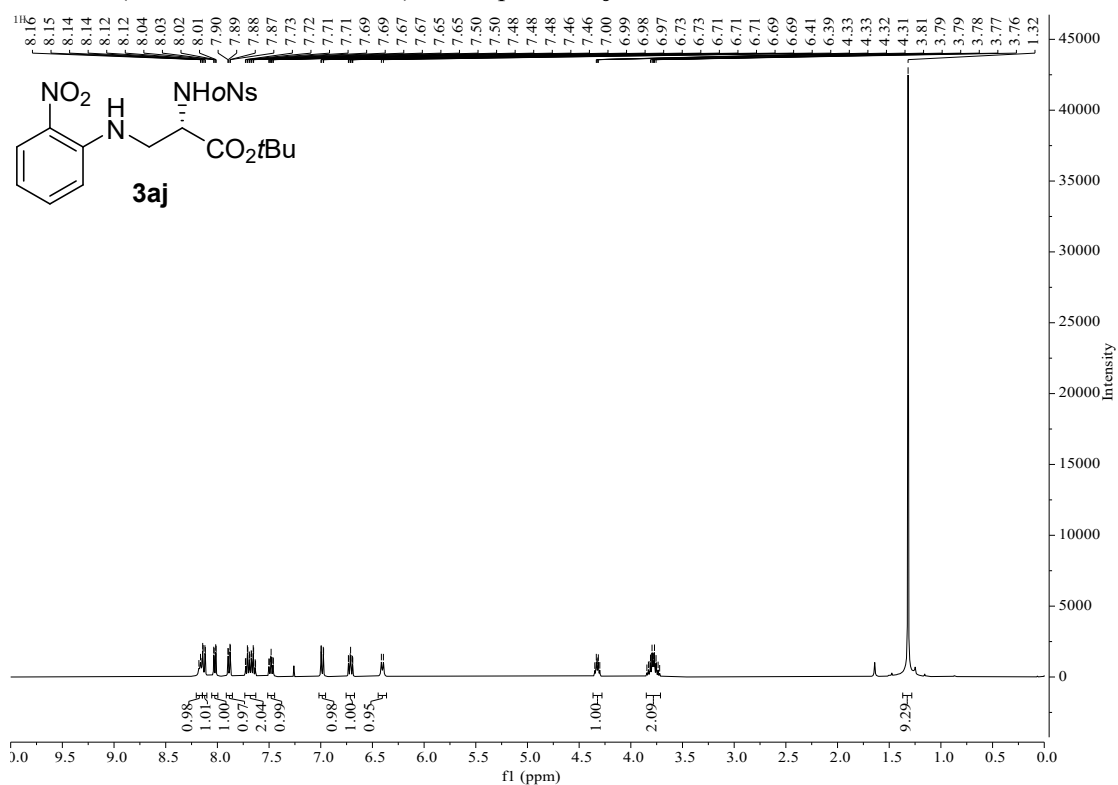

<sup>13</sup>C NMR (101 MHz, Chloroform-*d*) of compound **3aj**

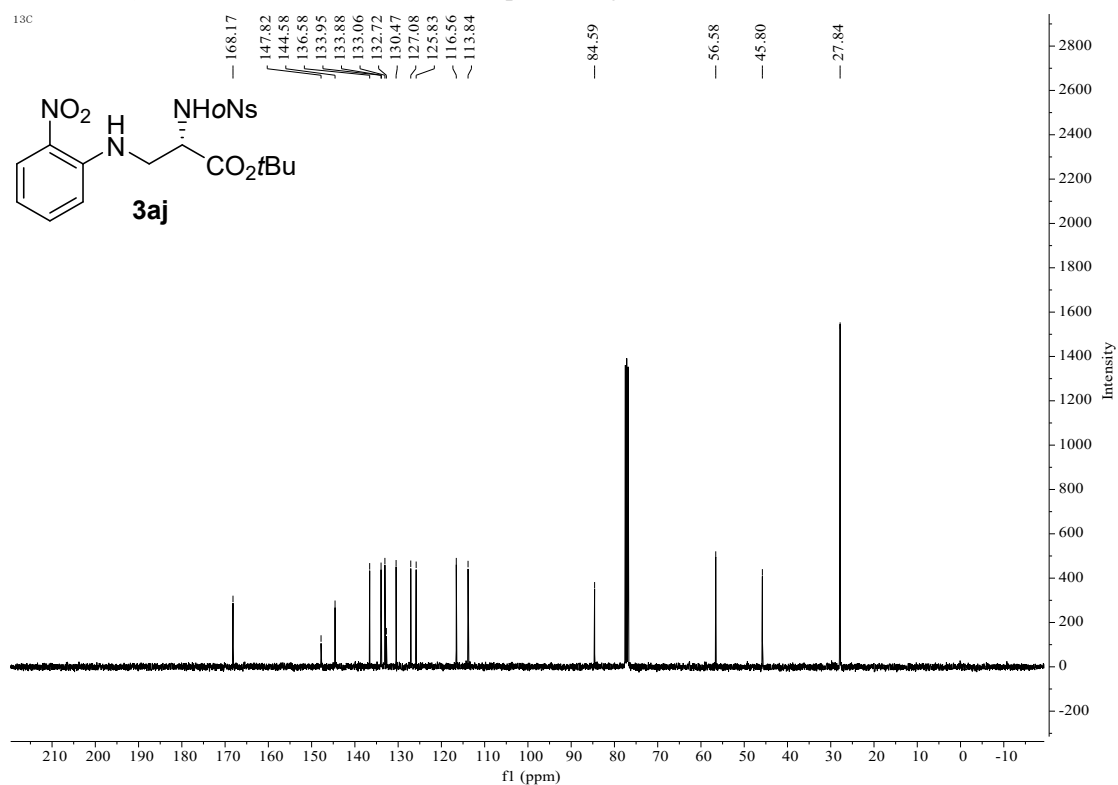

<sup>1</sup>H NMR (400 MHz, Chloroform-*d*) of compound **3ak**

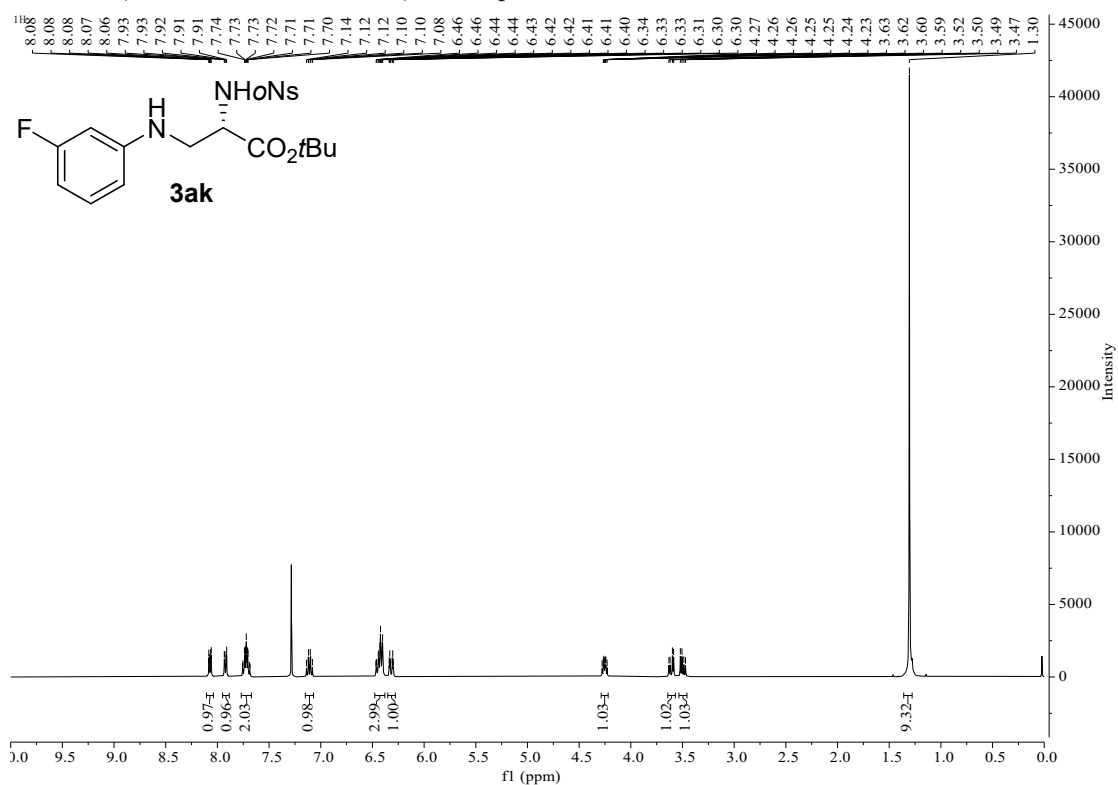

<sup>13</sup>C NMR (101 MHz, Chloroform-*d*) of compound **3ak**

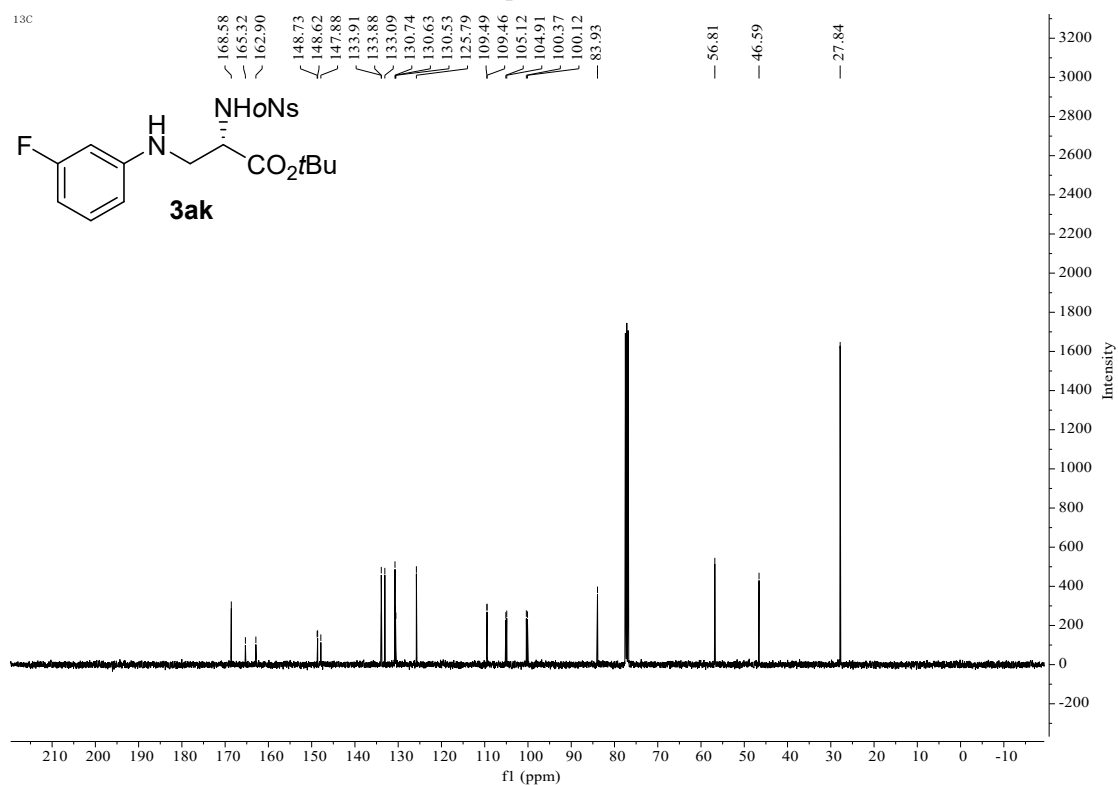

<sup>1</sup>H NMR (400 MHz, Chloroform-*d*) of compound **3al**

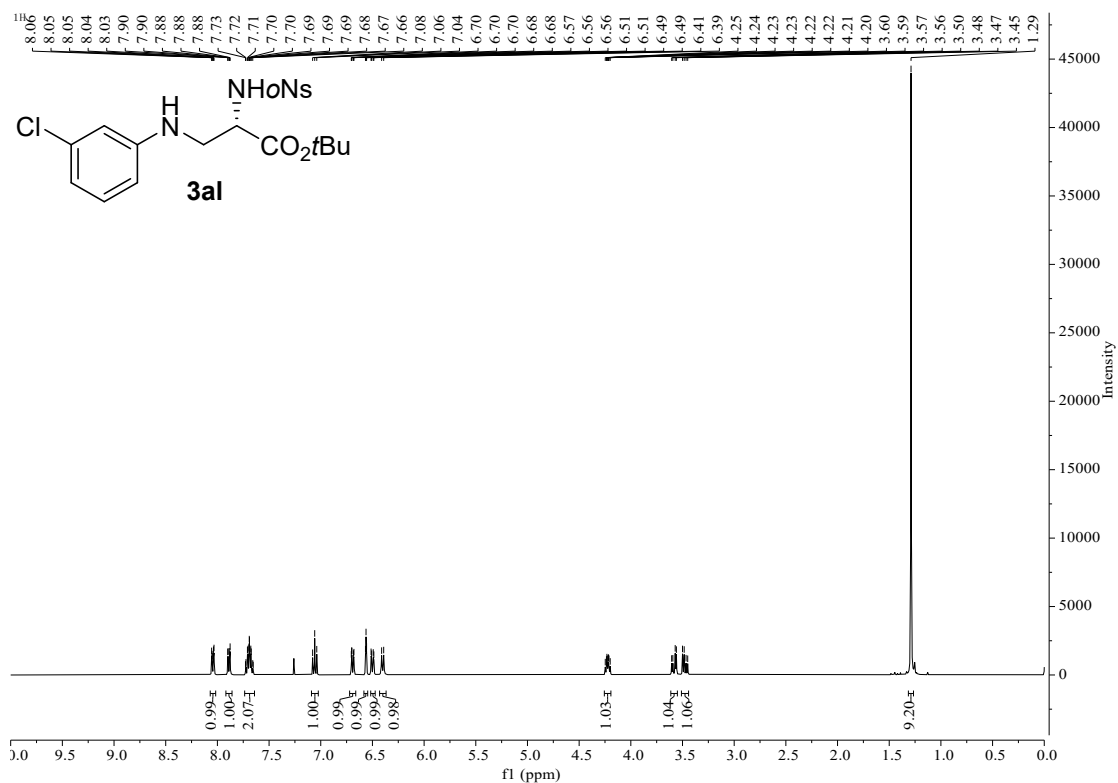

<sup>13</sup>C NMR (101 MHz, Chloroform-*d*) of compound **3al**

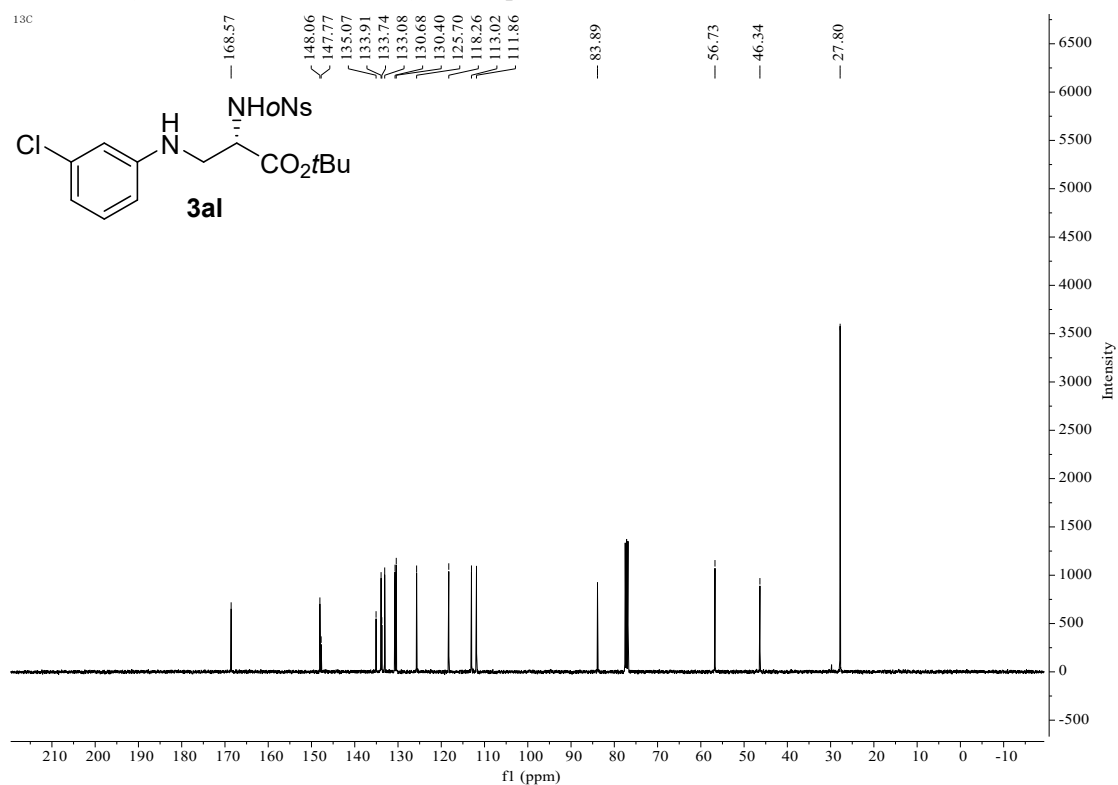

<sup>1</sup>H NMR (400 MHz, Chloroform-*d*) of compound **3am**

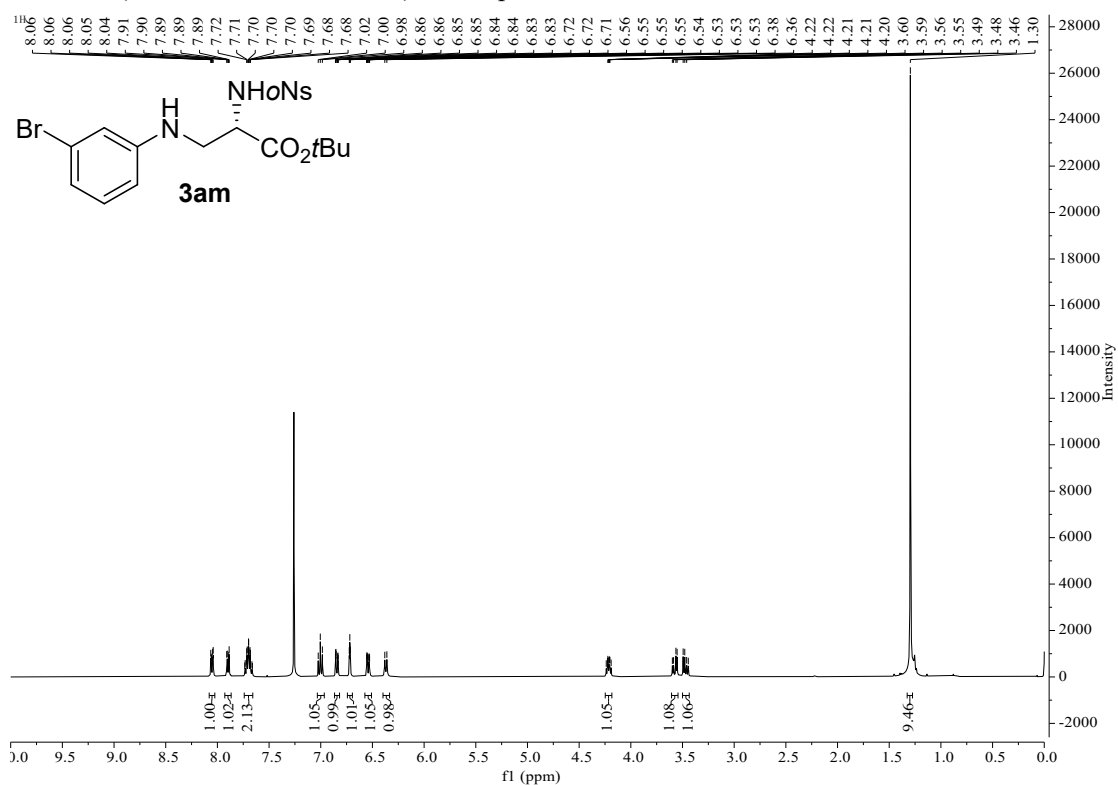

<sup>13</sup>C NMR (101 MHz, Chloroform-*d*) of compound **3am**

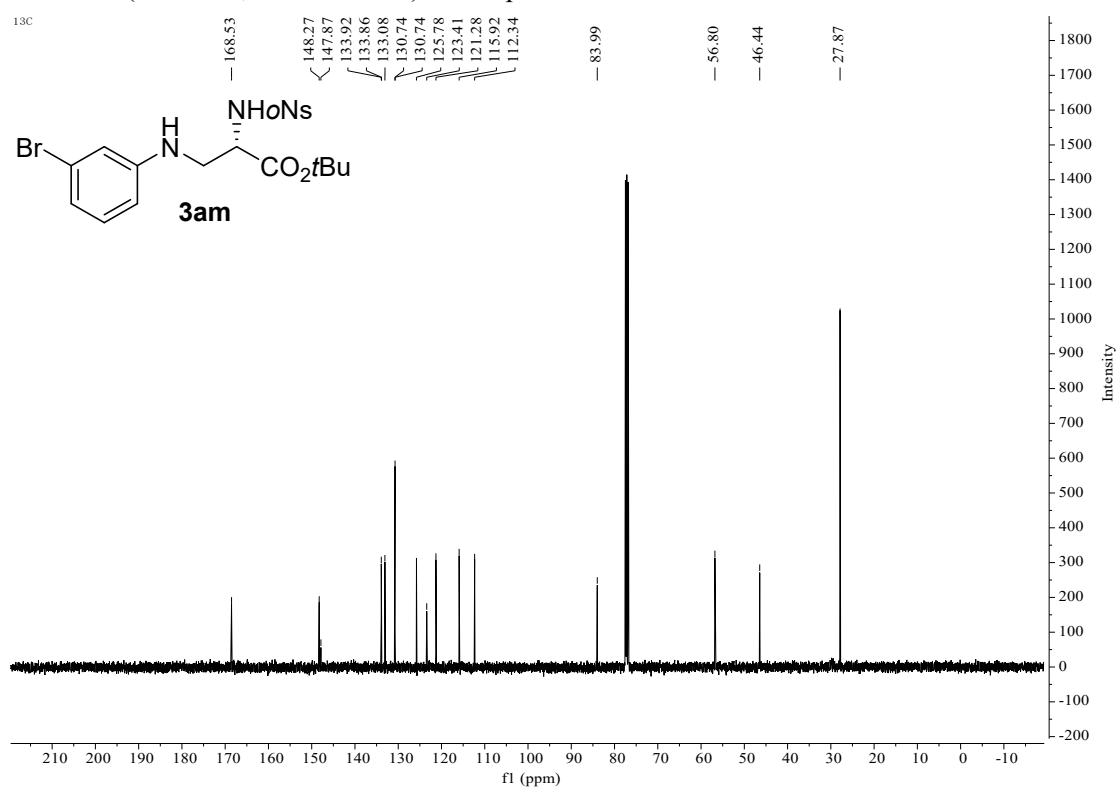

<sup>1</sup>H NMR (400 MHz, Chloroform-*d*) of compound **3an**

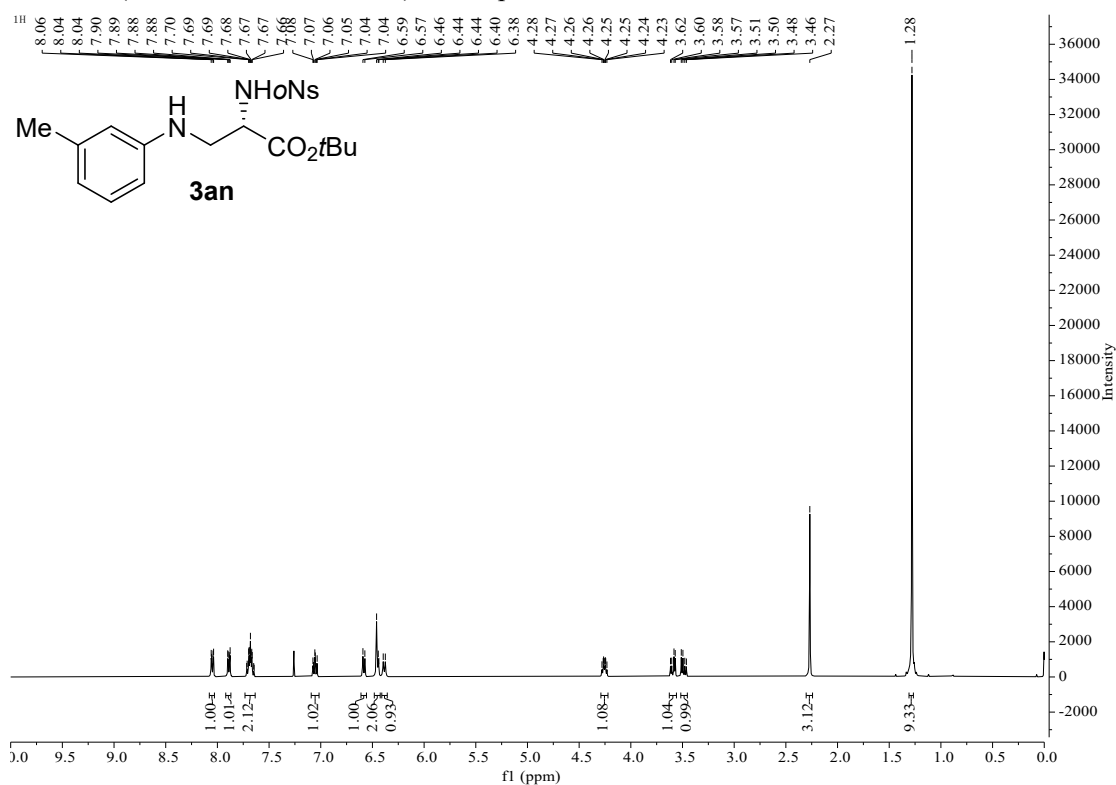

<sup>13</sup>C NMR (101 MHz, Chloroform-*d*) of compound **3an**

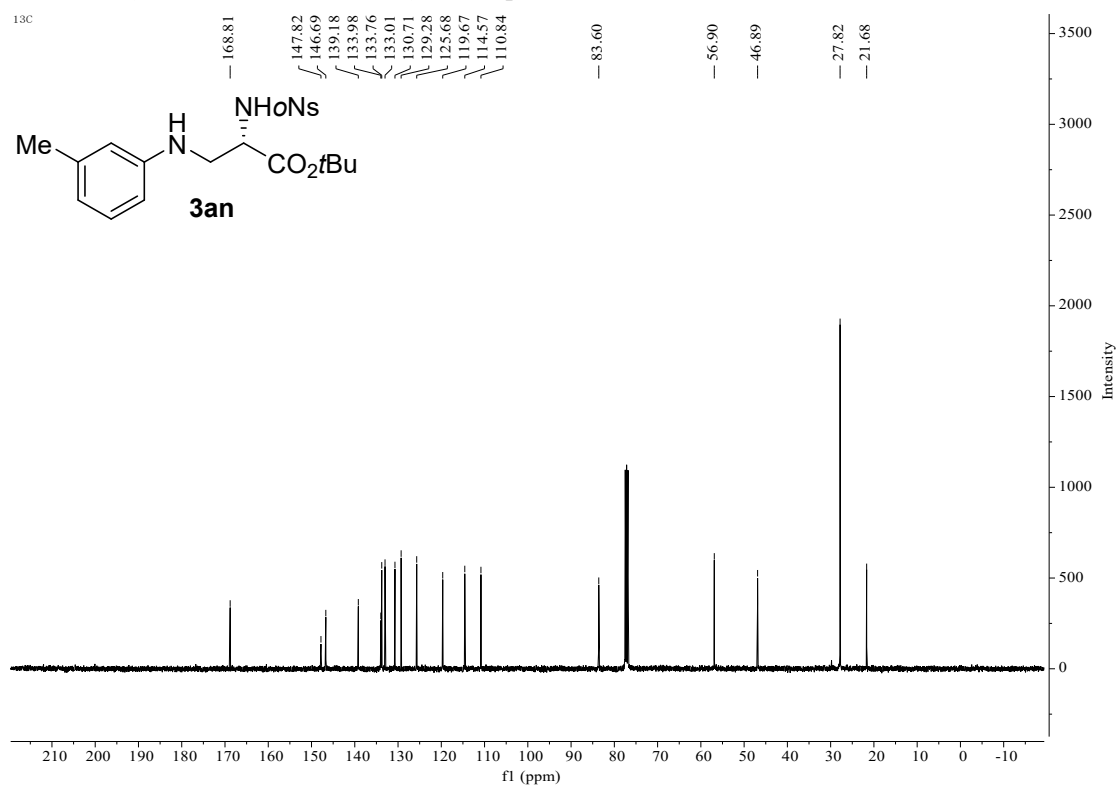

<sup>1</sup>H NMR (400 MHz, Chloroform-*d*) of compound **3ao**

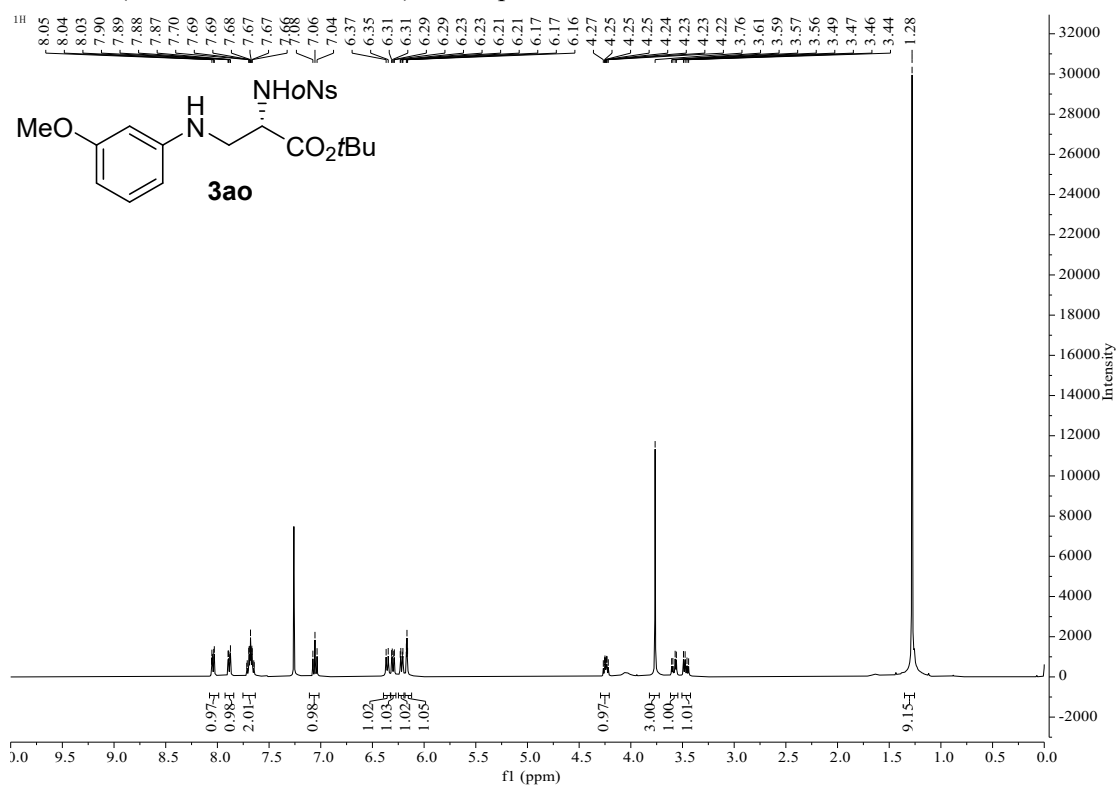

<sup>13</sup>C NMR (101 MHz, Chloroform-*d*) of compound **3ao**

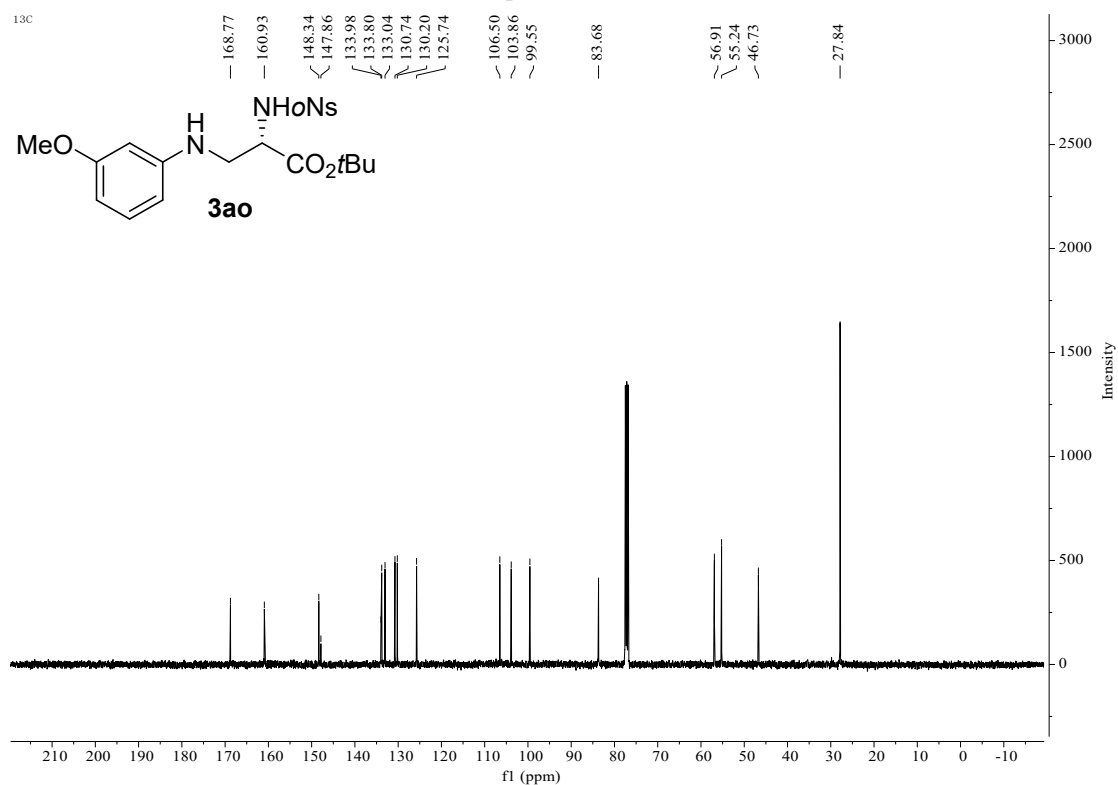

<sup>1</sup>H NMR (400 MHz, Chloroform-*d*) of compound **3ap**

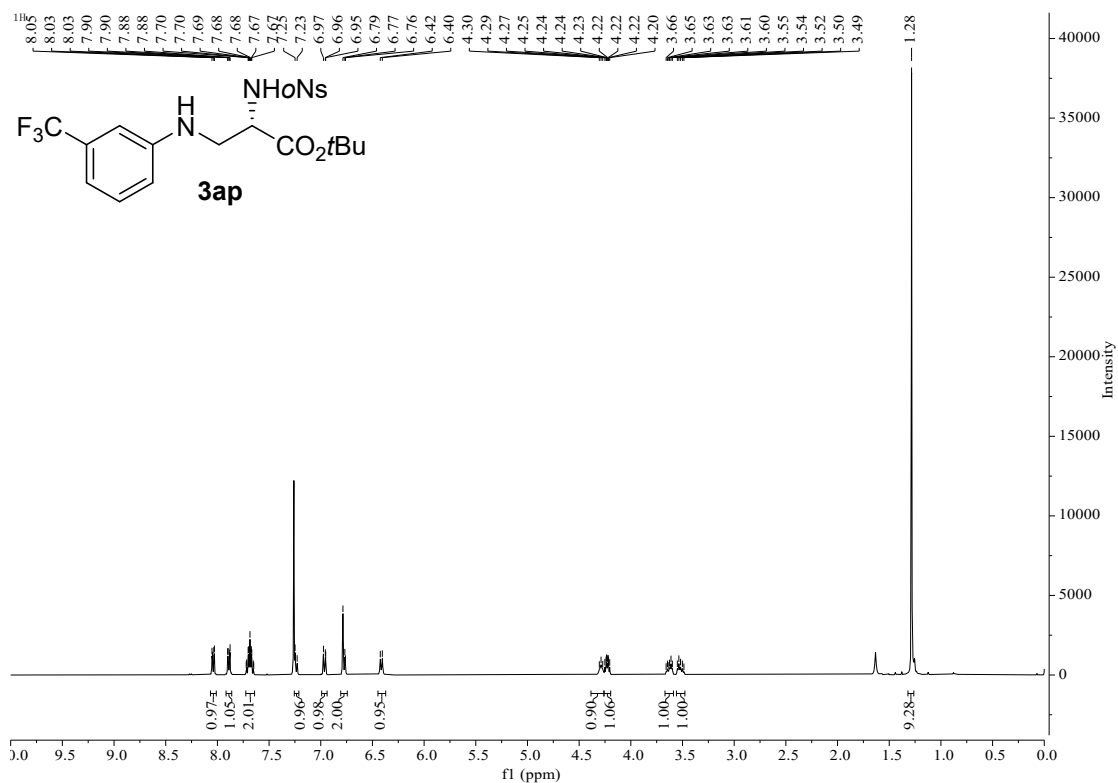

<sup>13</sup>C NMR (101 MHz, Chloroform-*d*) of compound **3ap**

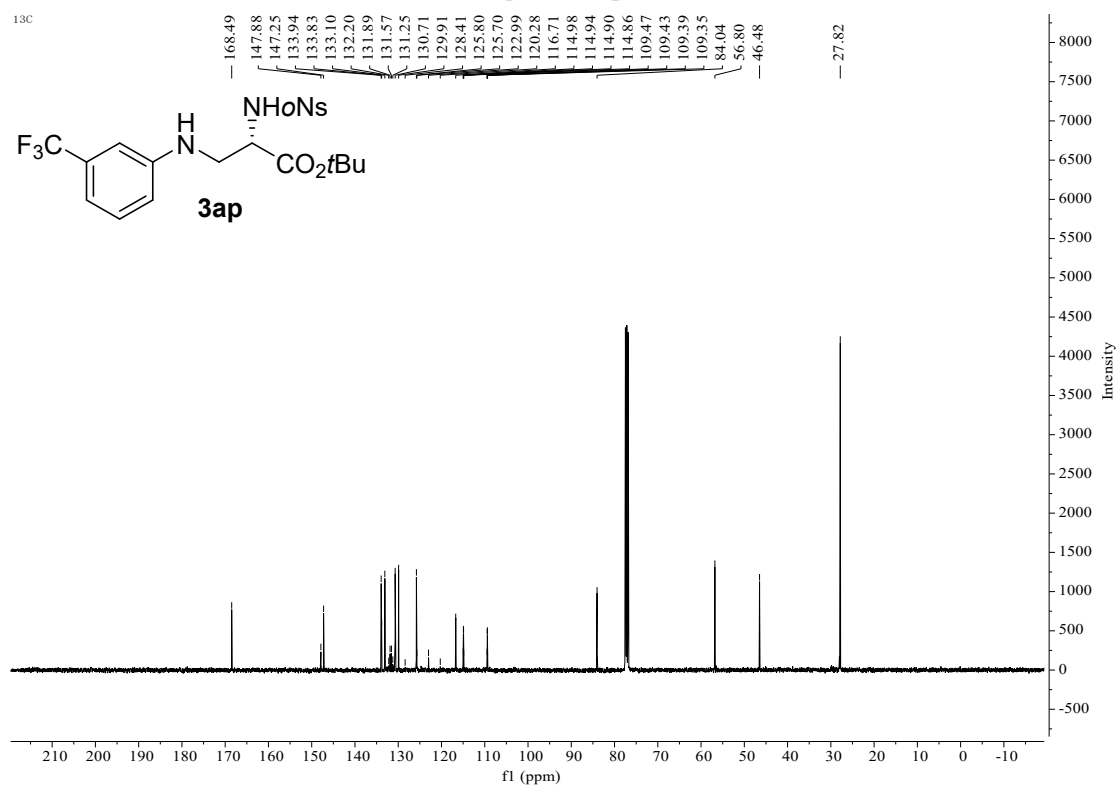

<sup>1</sup>H NMR (400 MHz, Chloroform-*d*) of compound **3aq**

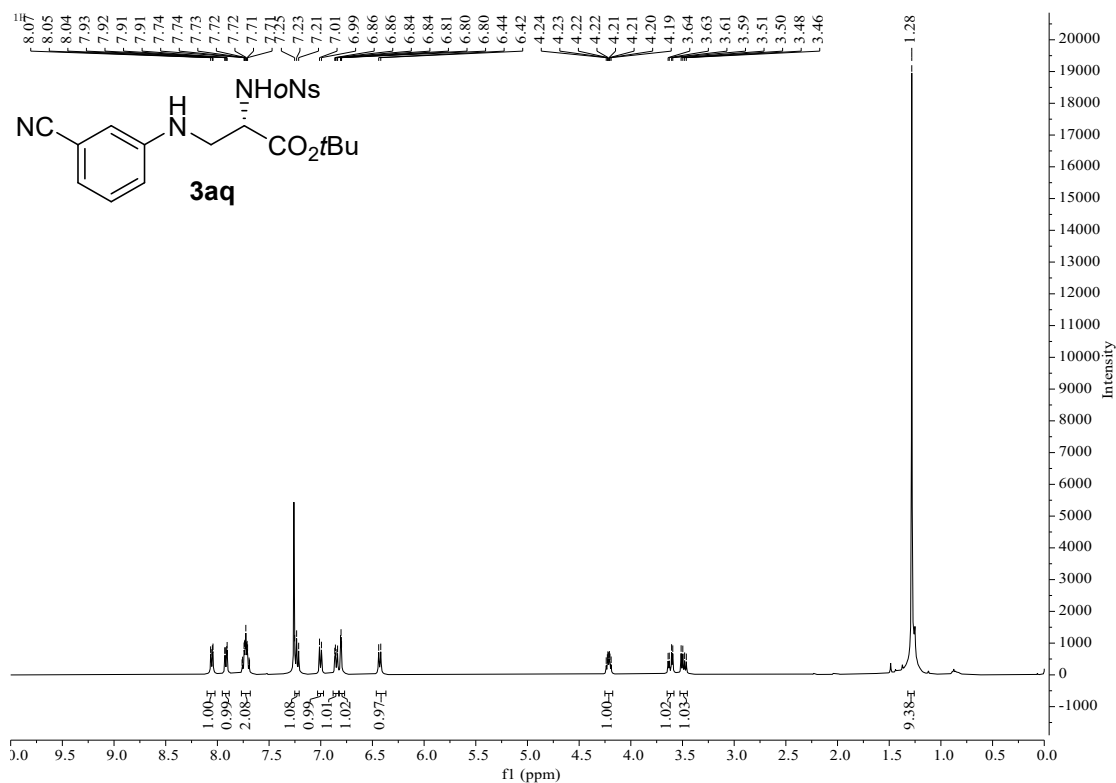

<sup>13</sup>C NMR (101 MHz, Chloroform-*d*) of compound **3aq**

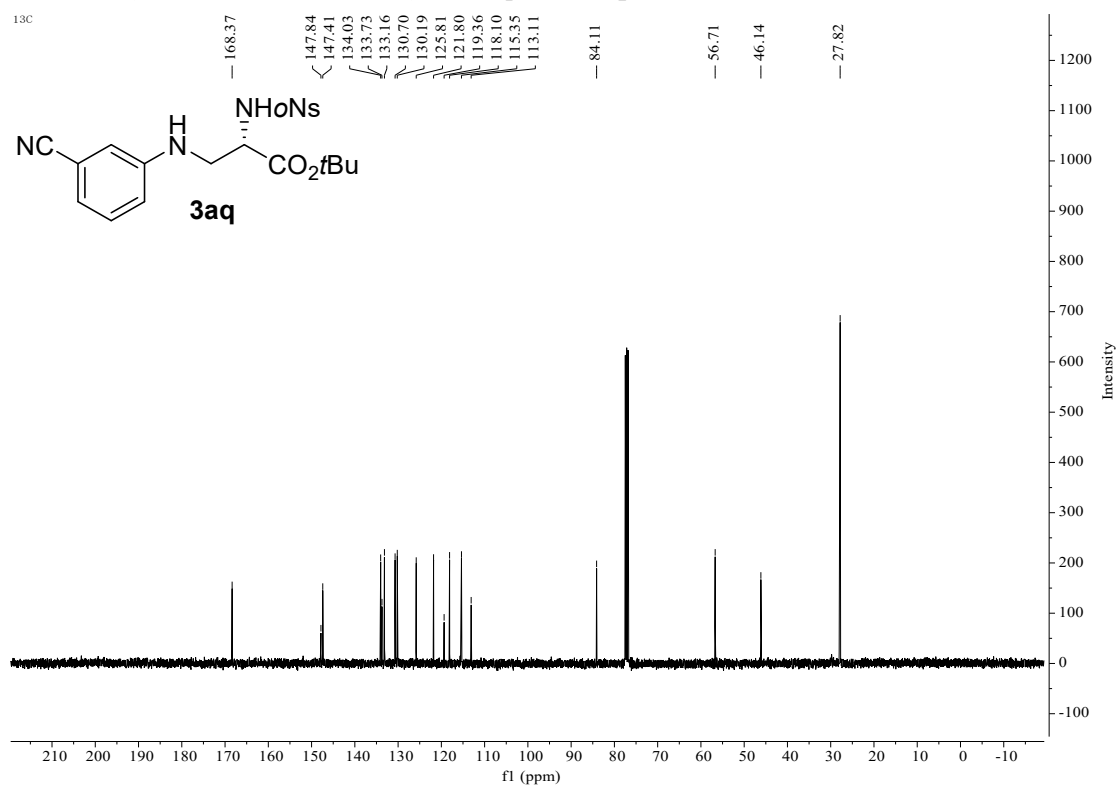



<sup>1</sup>H NMR (400 MHz, Chloroform-*d*) of compound **3ar**

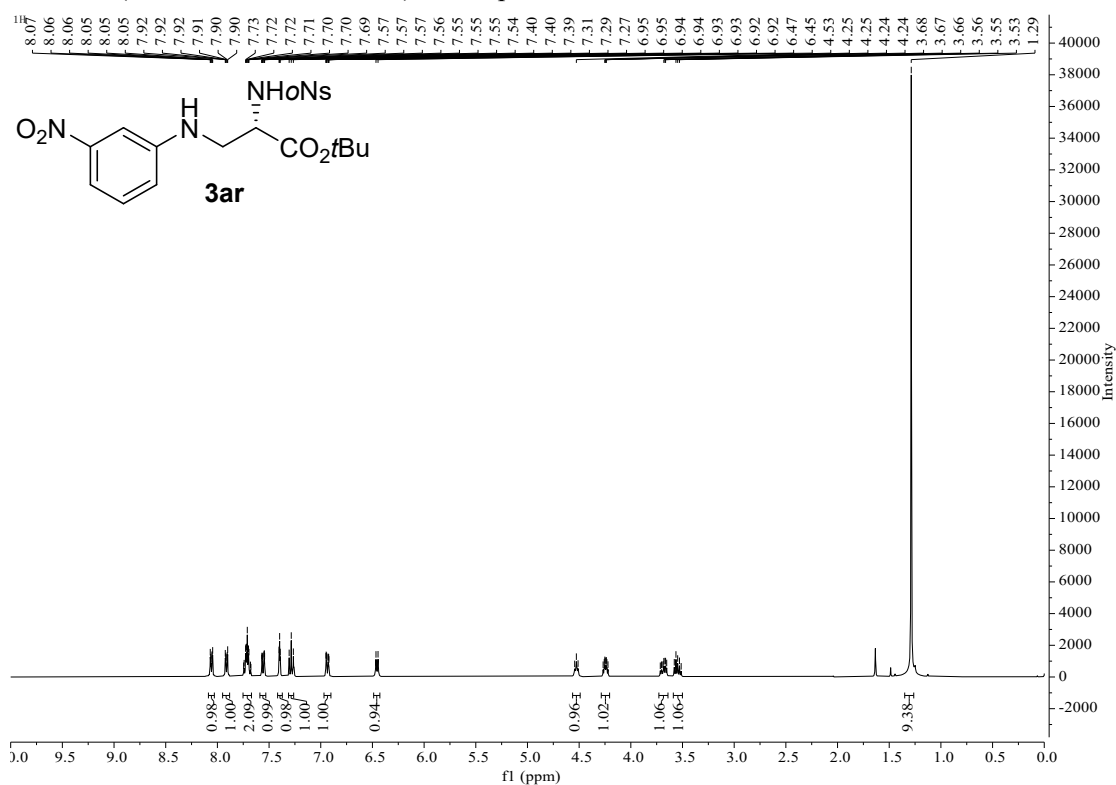

<sup>13</sup>C NMR (101 MHz, Chloroform-*d*) of compound **3ar**

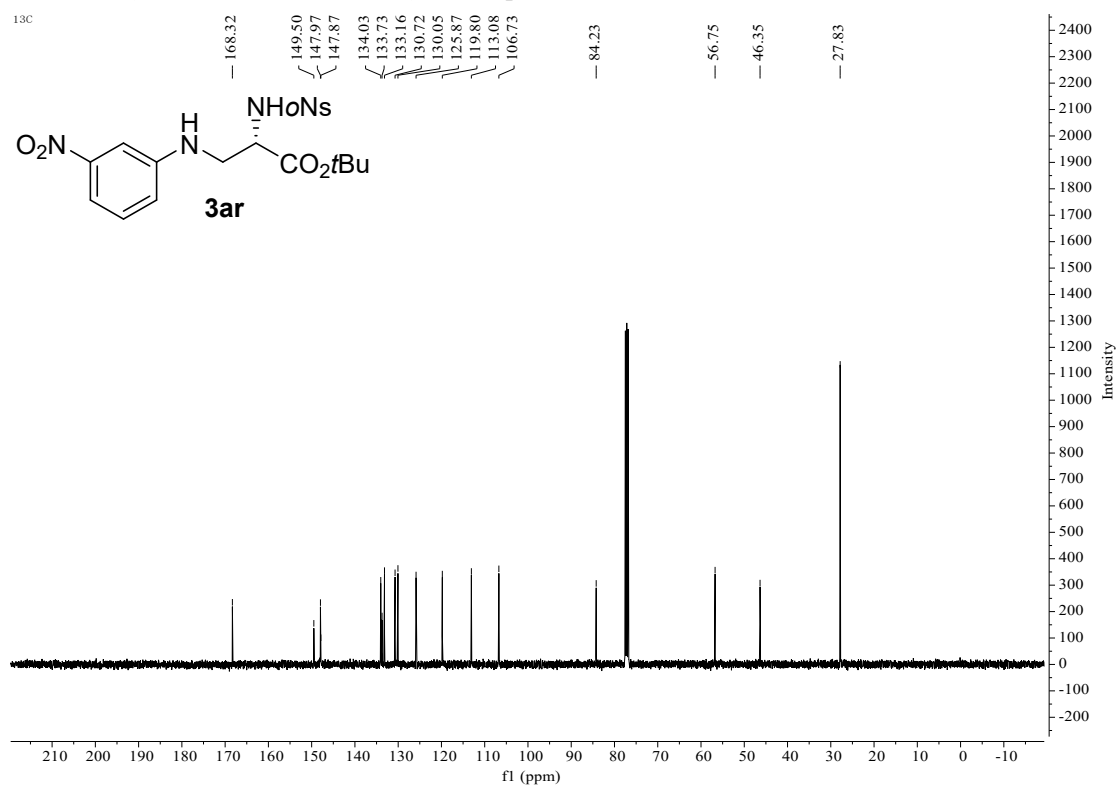

<sup>1</sup>H NMR (400 MHz, Chloroform-*d*) of compound **3as**

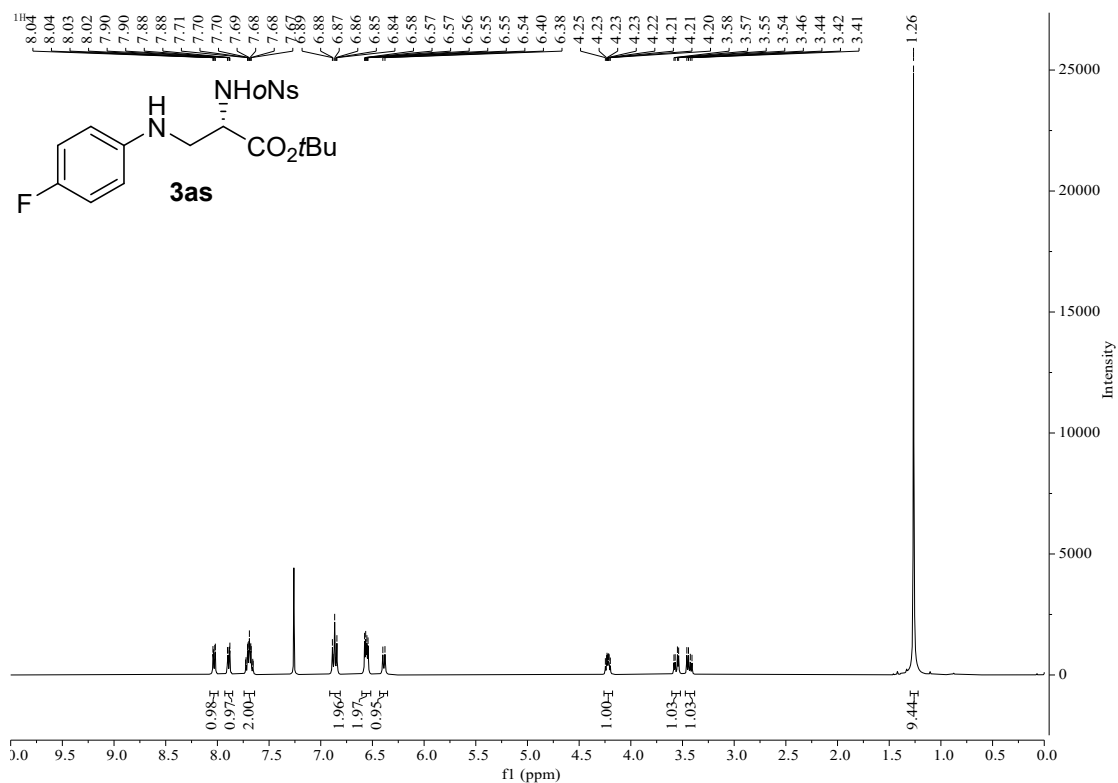

<sup>13</sup>C NMR (101 MHz, Chloroform-*d*) of compound **3as**

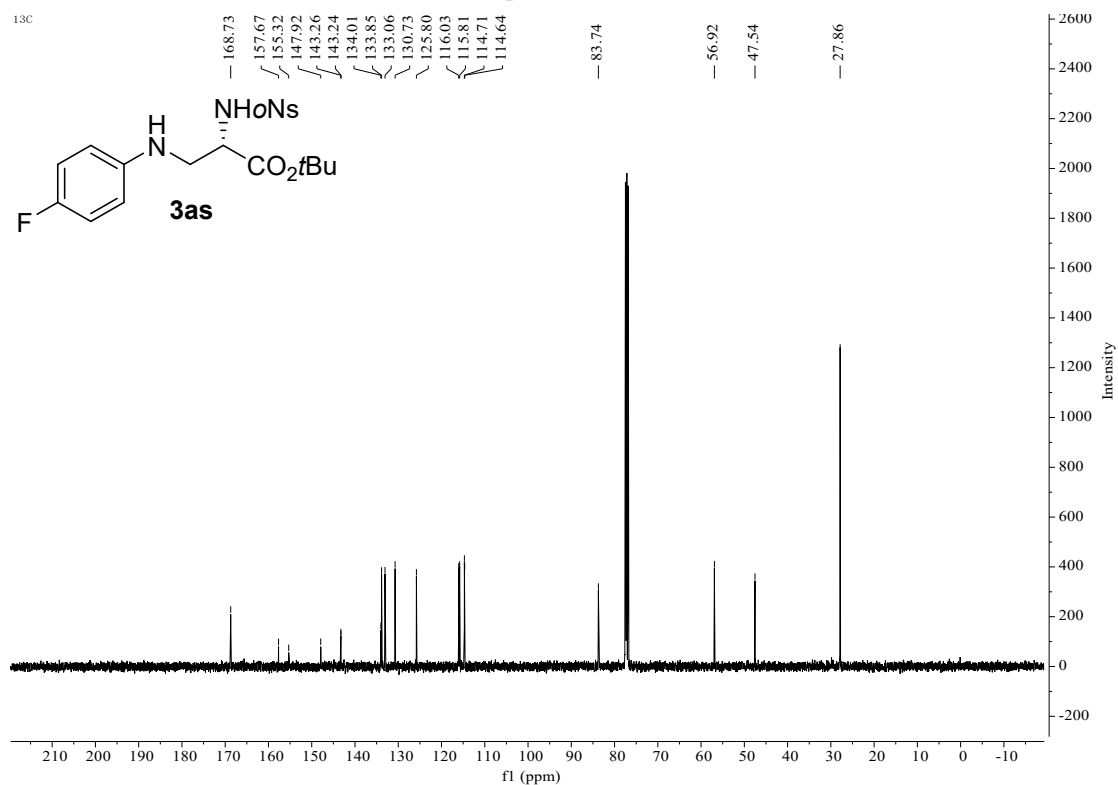

<sup>1</sup>H NMR (400 MHz, Chloroform-*d*) of compound **3at**

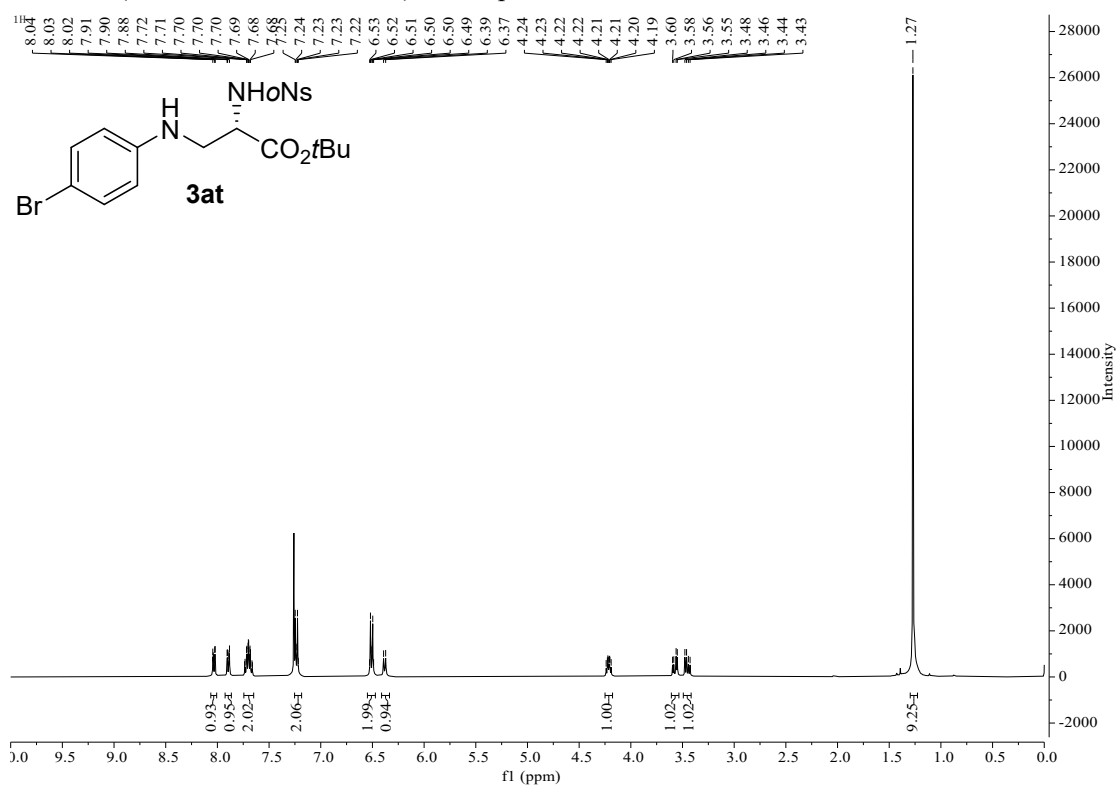

<sup>13</sup>C NMR (101 MHz, Chloroform-*d*) of compound **3at**

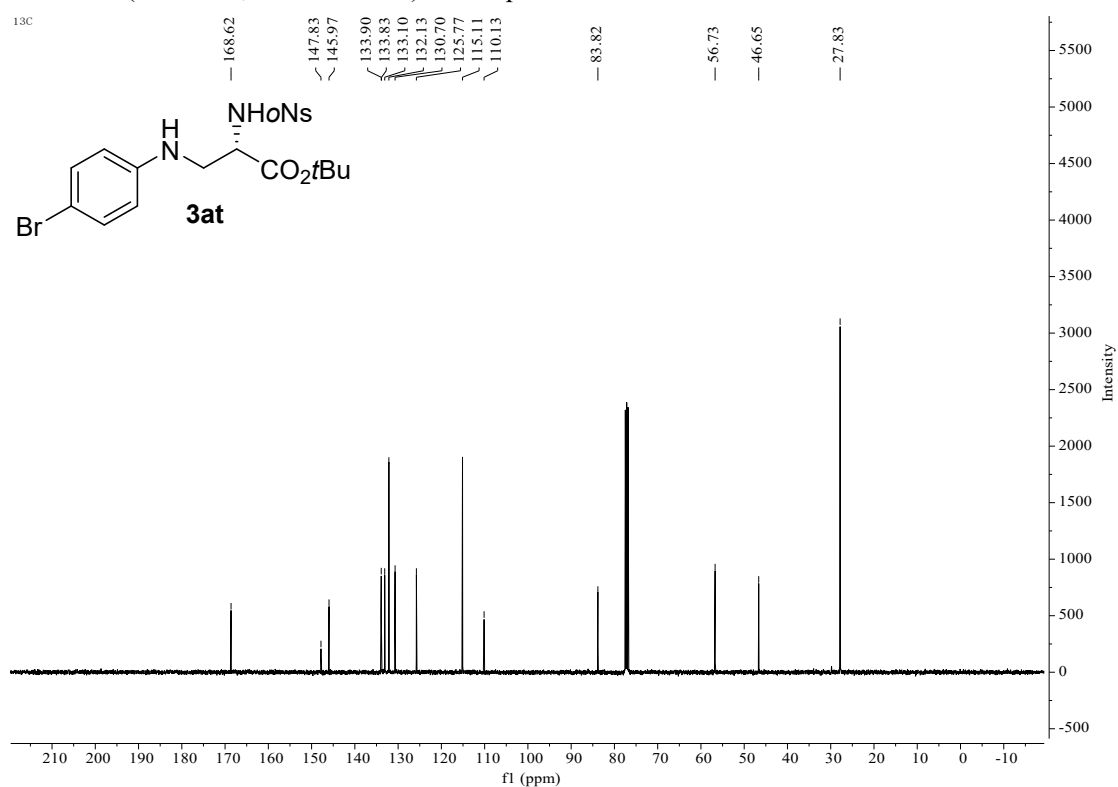

<sup>1</sup>H NMR (400 MHz, Chloroform-*d*) of compound **3au**

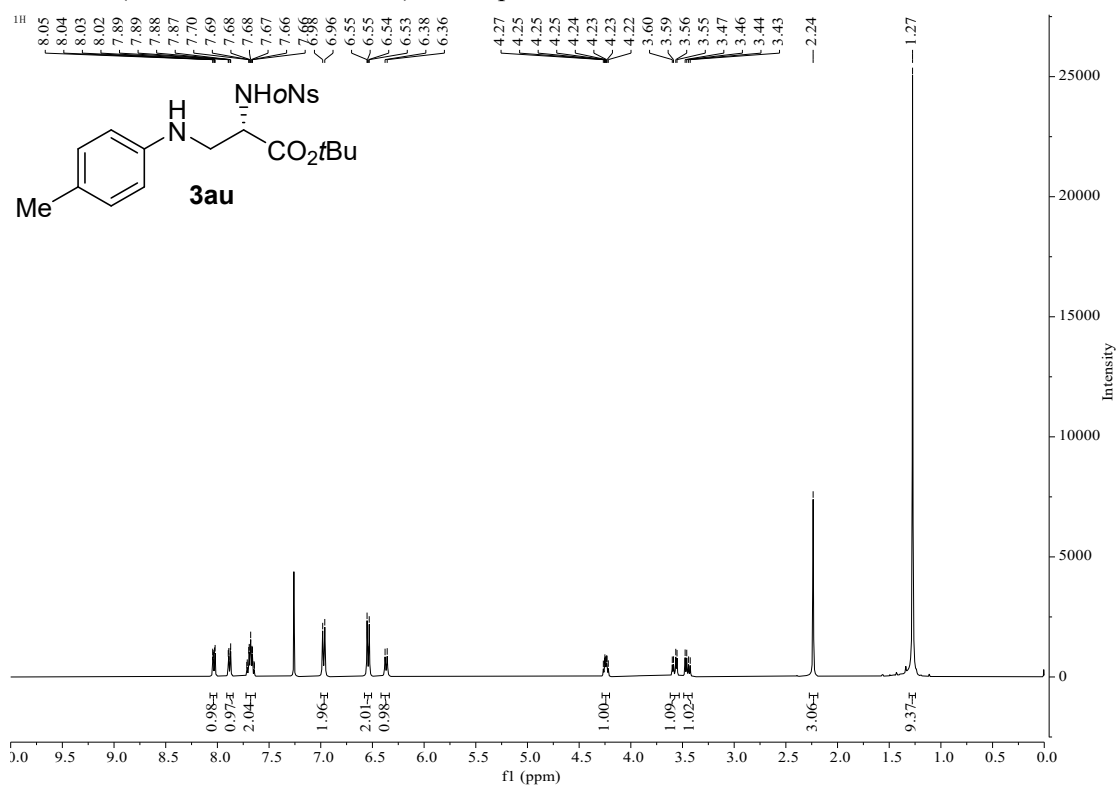

<sup>13</sup>C NMR (101 MHz, Chloroform-*d*) of compound **3au**

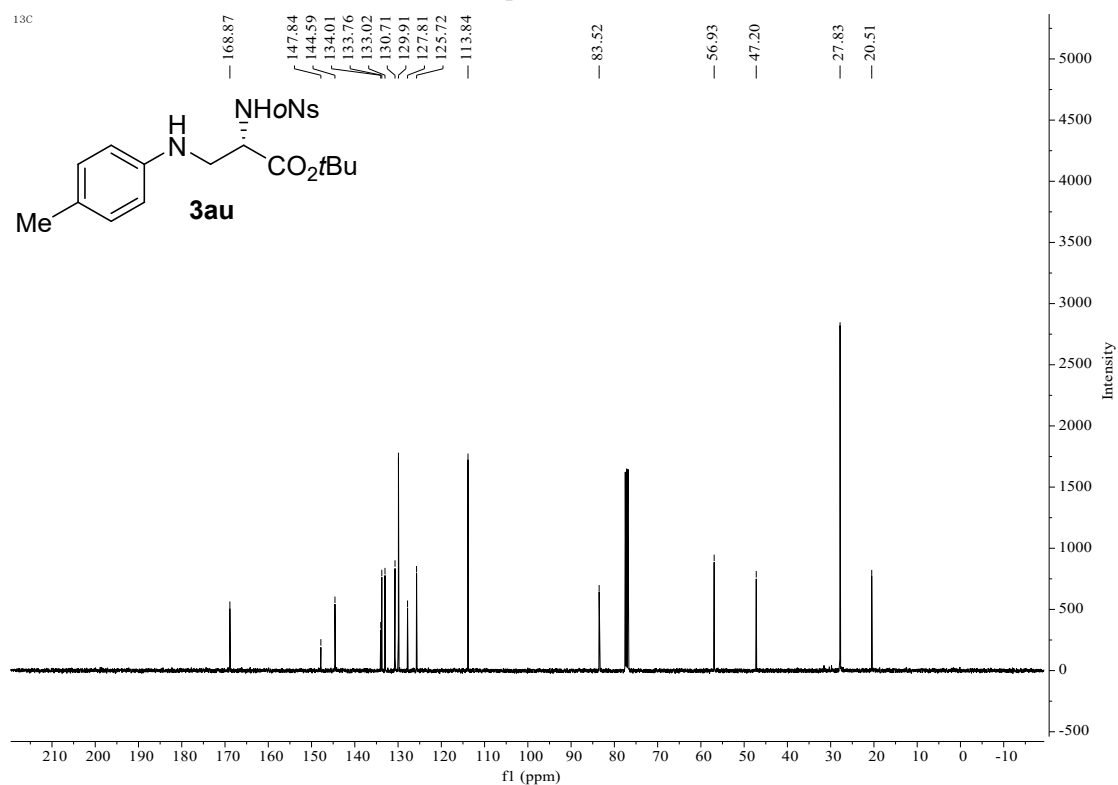

<sup>1</sup>H NMR (400 MHz, Chloroform-*d*) of compound **3av**

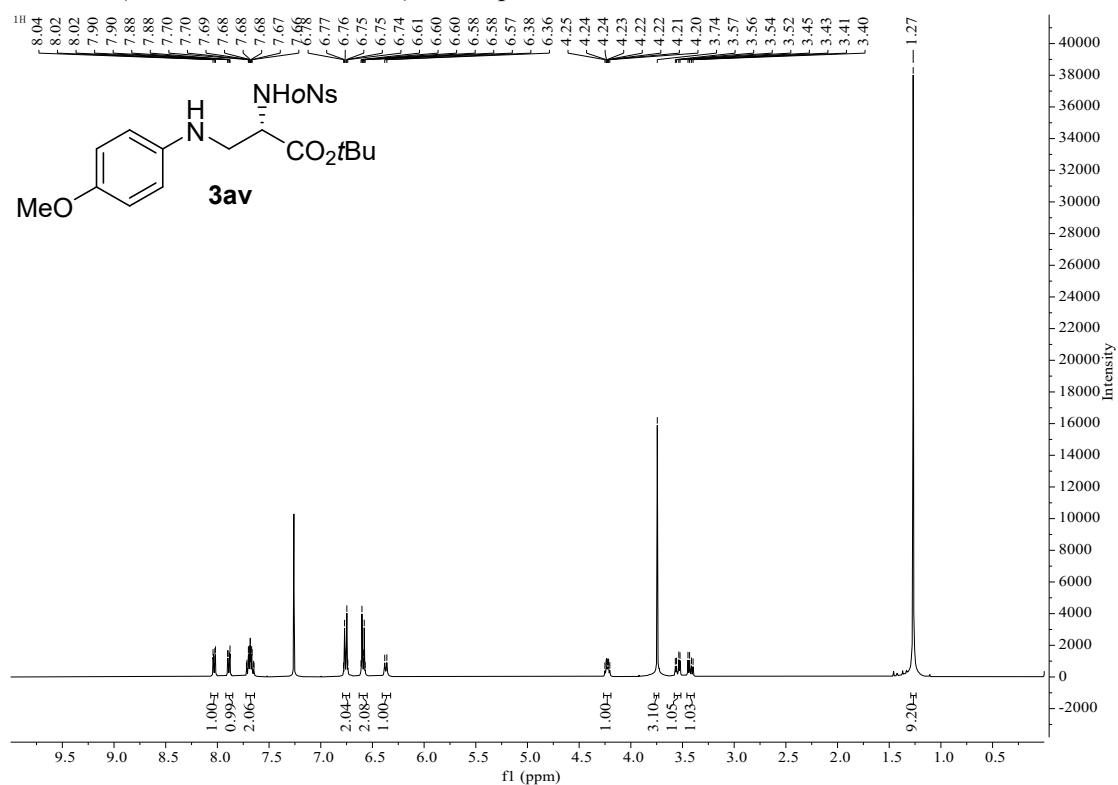

<sup>13</sup>C NMR (101 MHz, Chloroform-*d*) of compound **3av**

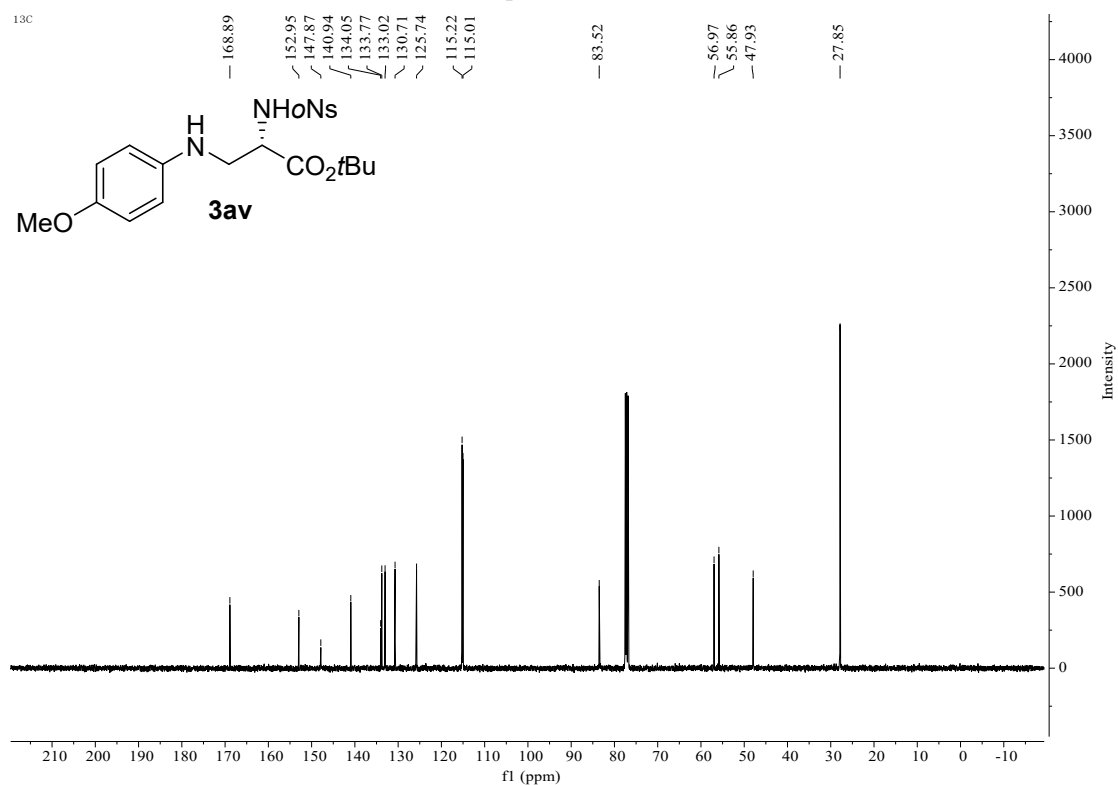

<sup>1</sup>H NMR (400 MHz, Chloroform-*d*) of compound **3aw**

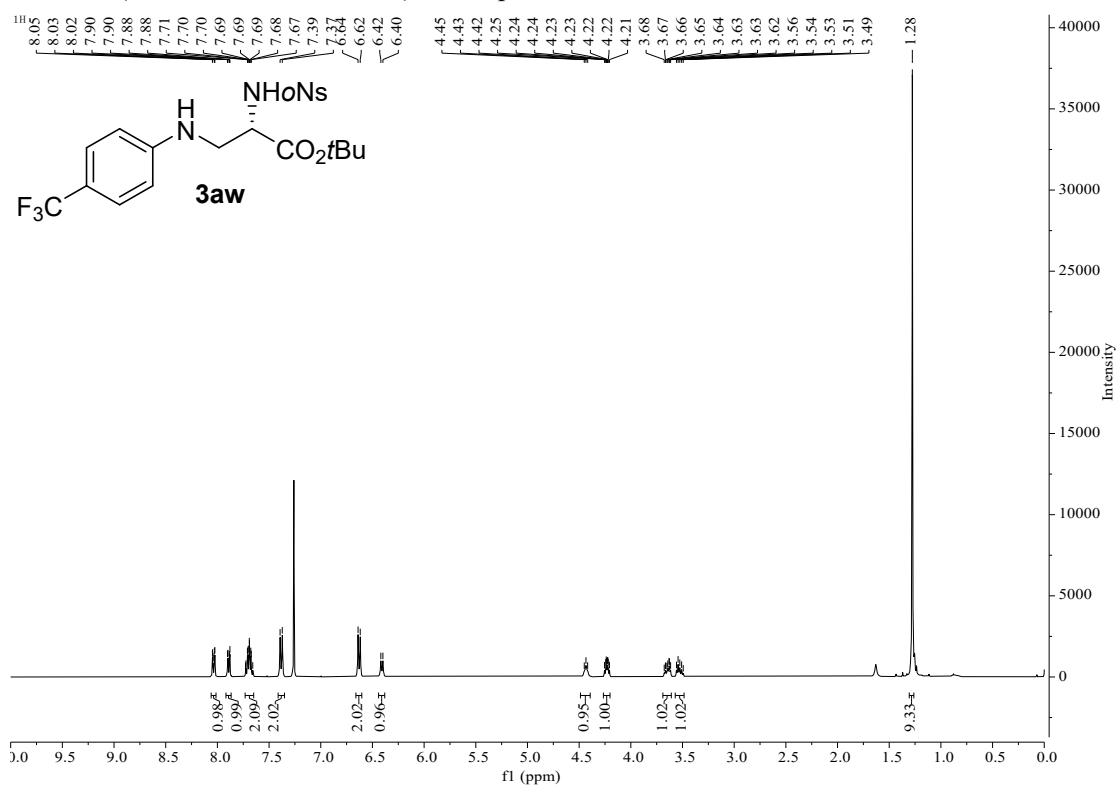

<sup>13</sup>C NMR (101 MHz, Chloroform-*d*) of compound **3aw**

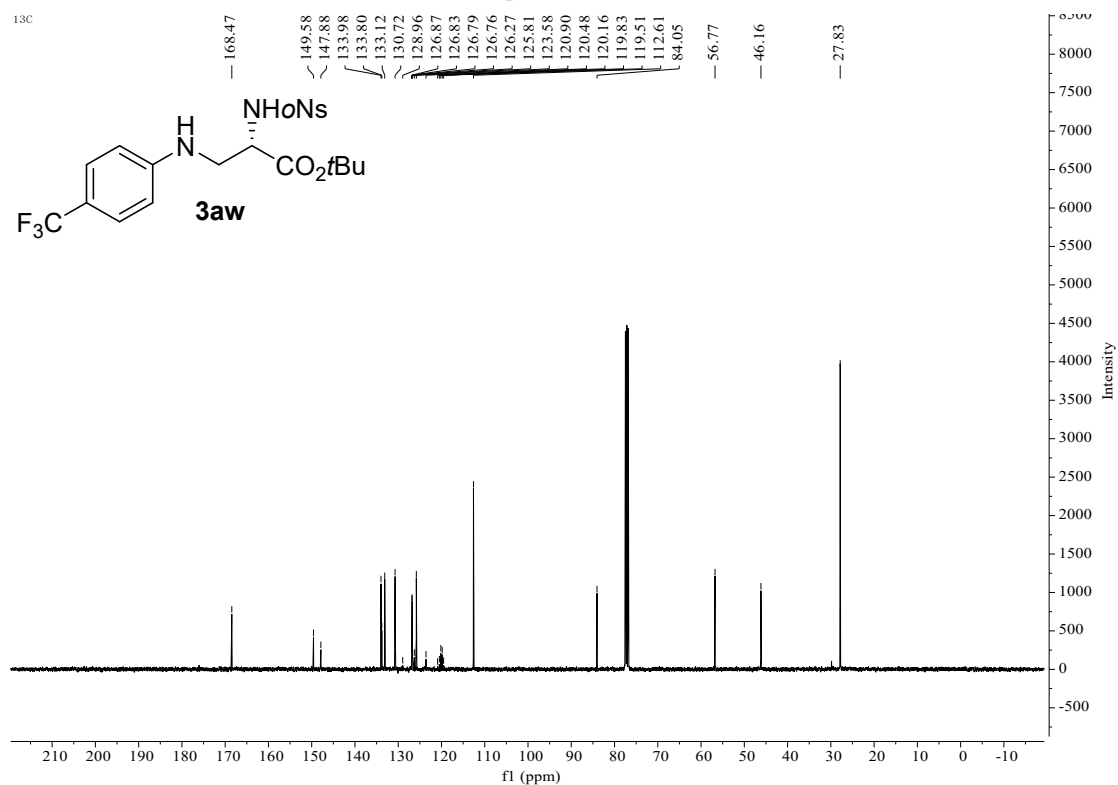

<sup>1</sup>H NMR (400 MHz, Chloroform-*d*) of compound **3ax**

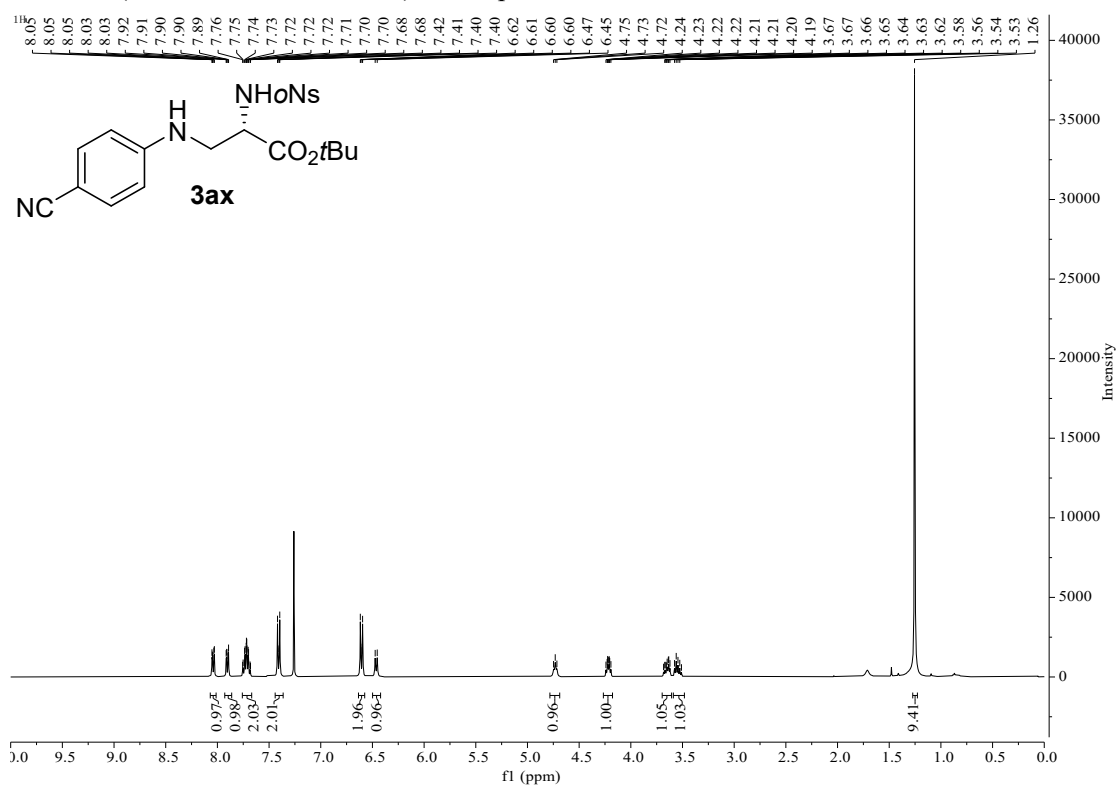

<sup>13</sup>C NMR (101 MHz, Chloroform-*d*) of compound **3ax**

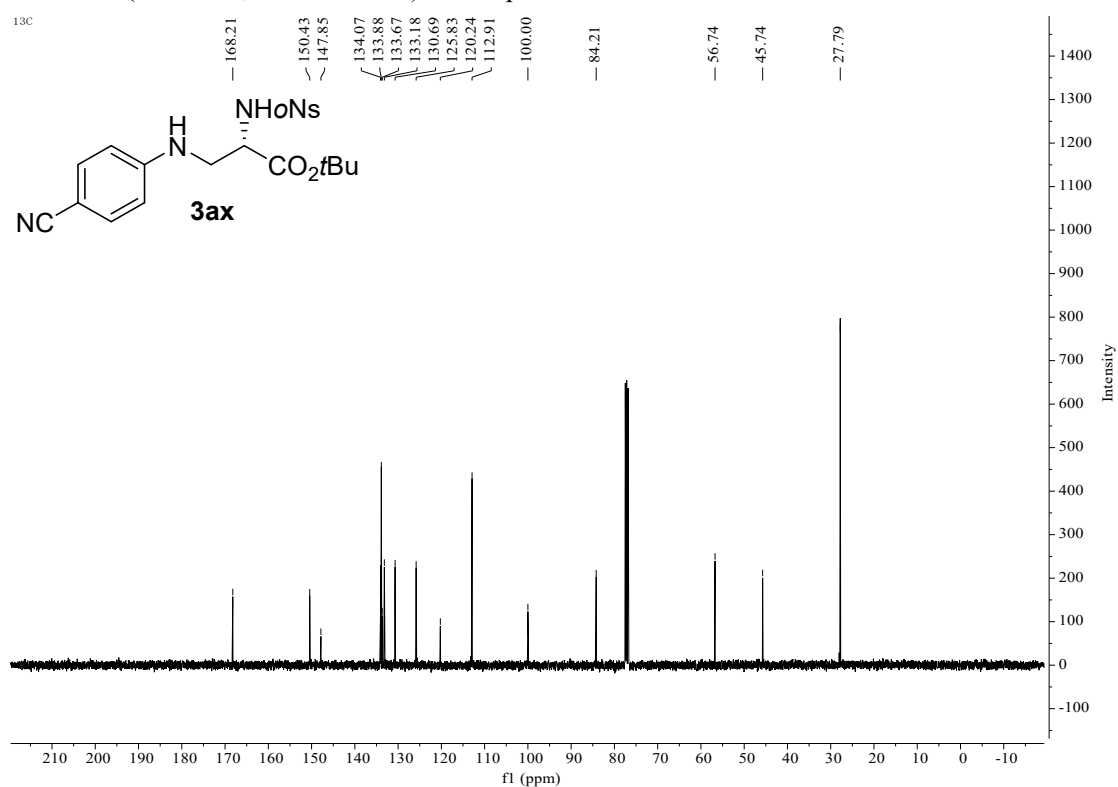

<sup>1</sup>H NMR (400 MHz, Chloroform-*d*) of compound **3ay**

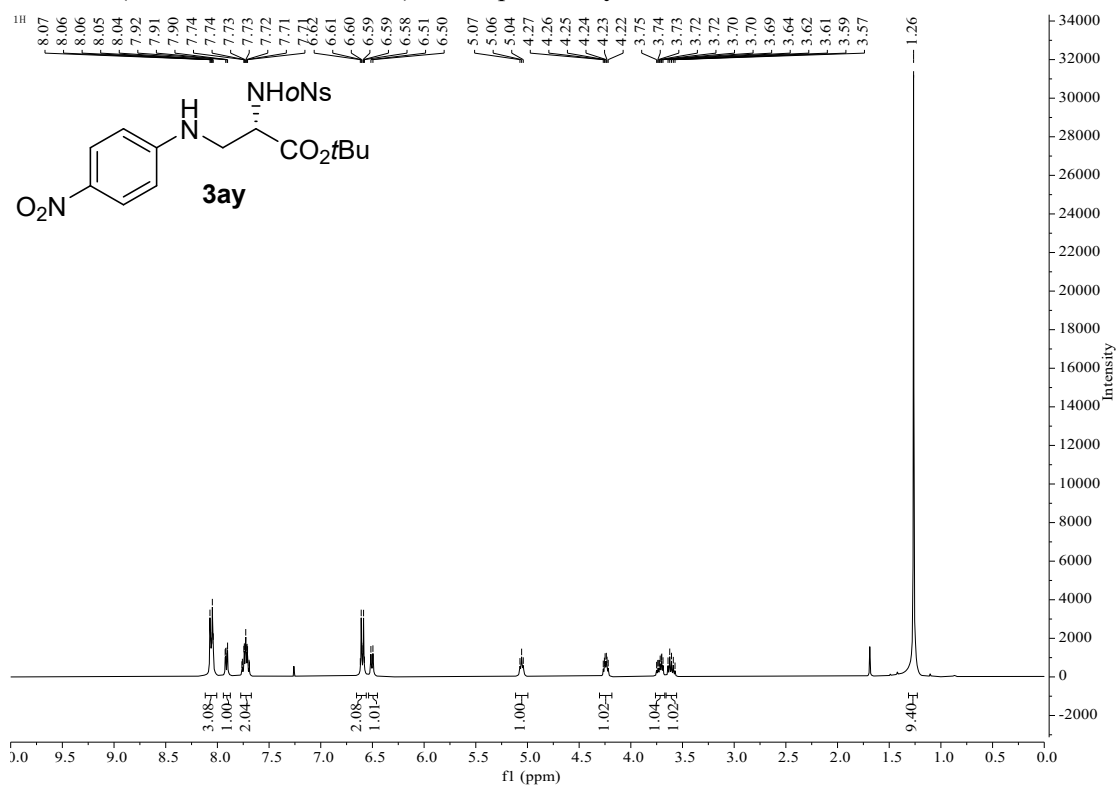

<sup>13</sup>C NMR (101 MHz, Chloroform-*d*) of compound **3ay**

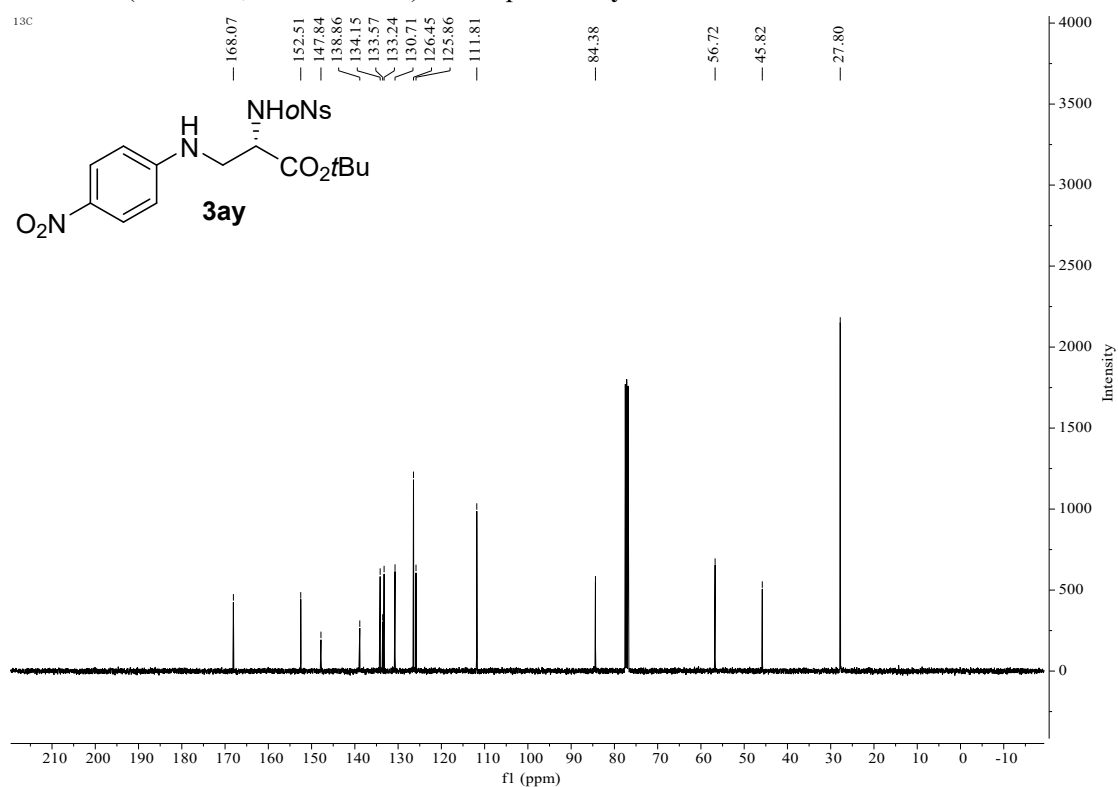



<sup>1</sup>H NMR (400 MHz, Chloroform-*d*) of compound **3az**

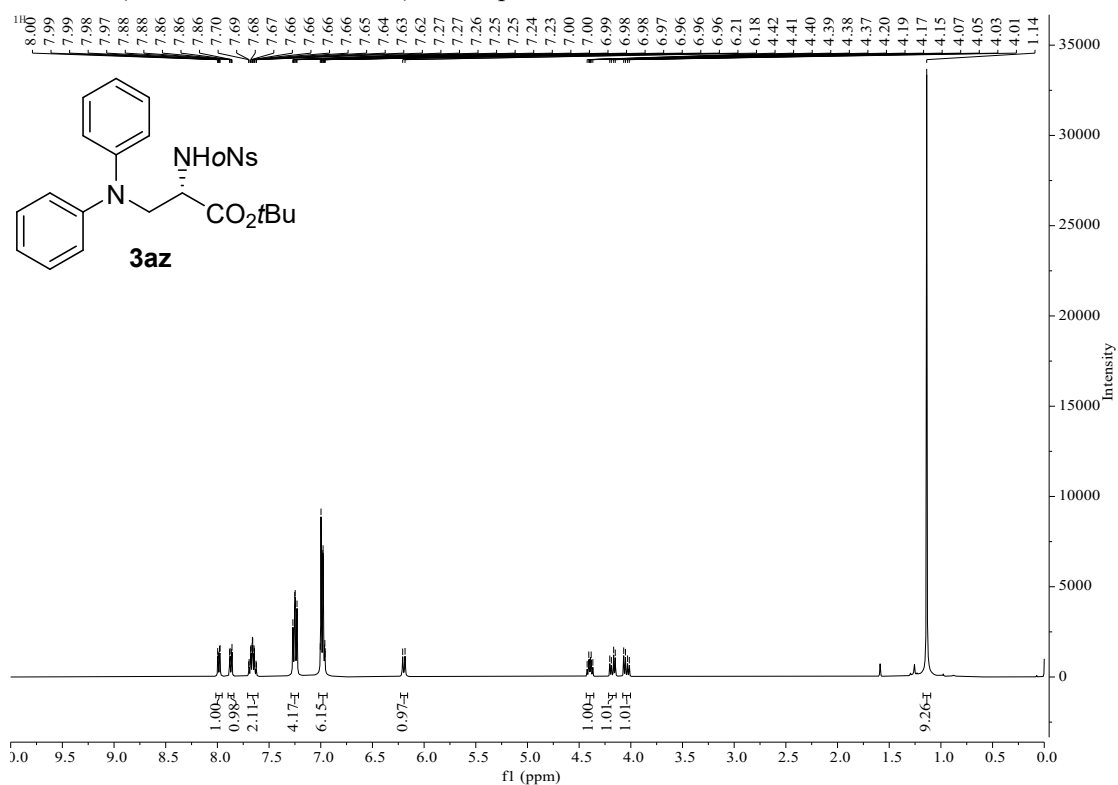

<sup>13</sup>C NMR (101 MHz, Chloroform-*d*) of compound **3az**

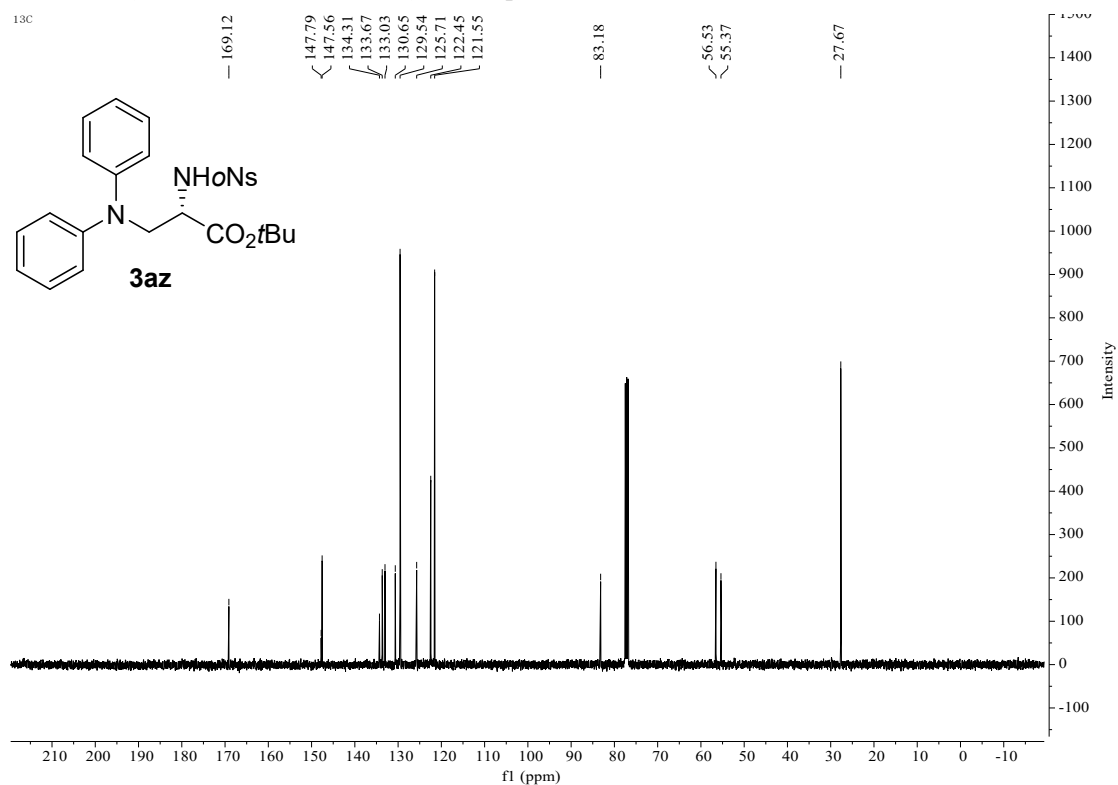

<sup>1</sup>H NMR (400 MHz, DMSO-*d*<sub>6</sub>) of compound **5aa**

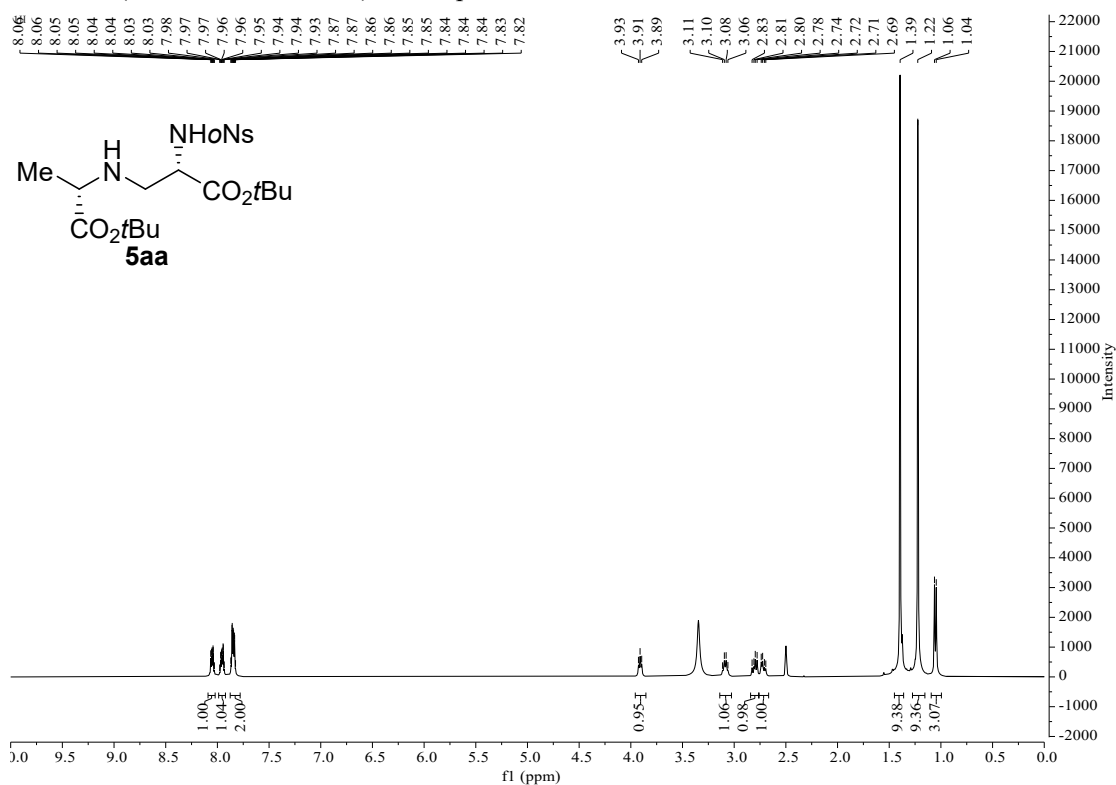

<sup>13</sup>C NMR (101 MHz, DMSO-*d*<sub>6</sub>) of compound **5aa**

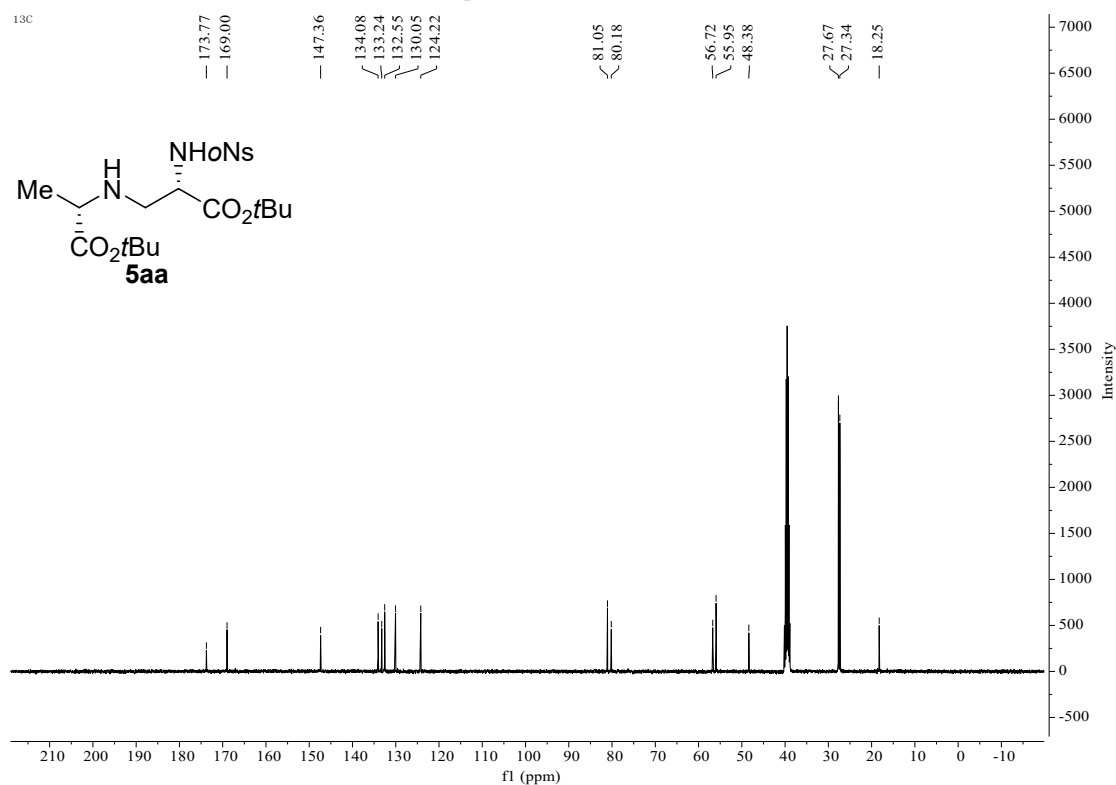

<sup>1</sup>H NMR (400 MHz, Chloroform-*d*) of compound **5ab**

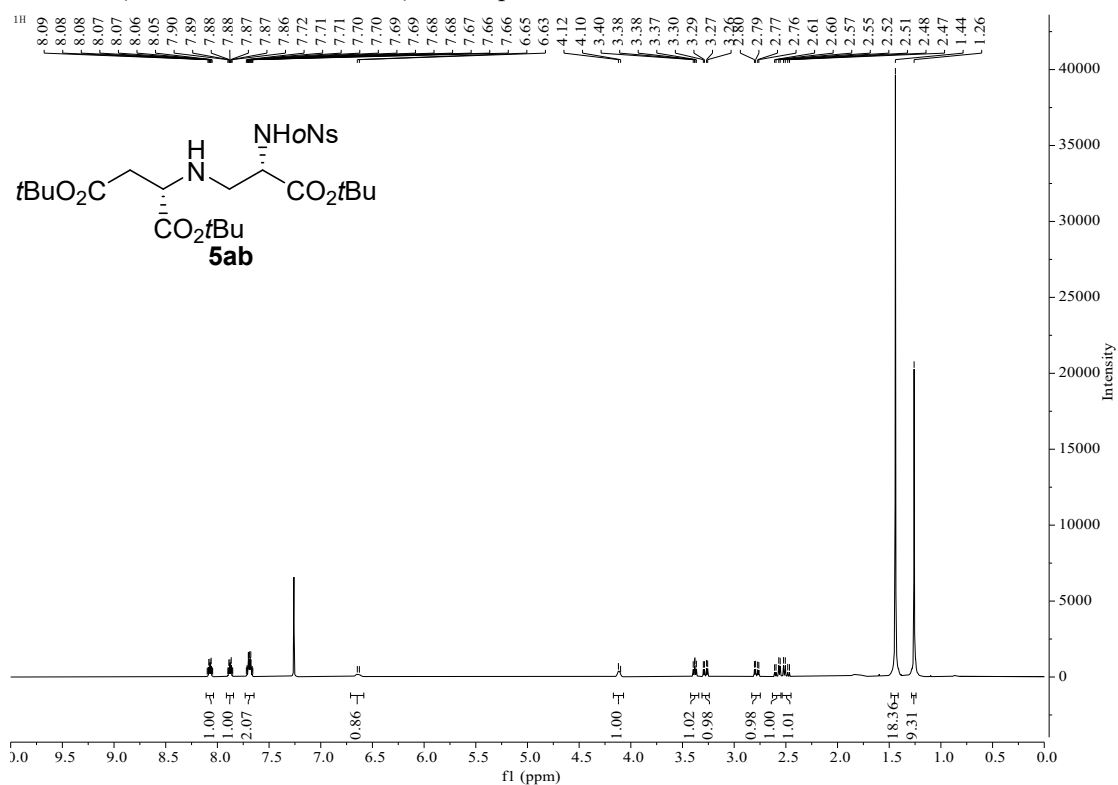

<sup>13</sup>C NMR (101 MHz, Chloroform-*d*) of compound **5ab**

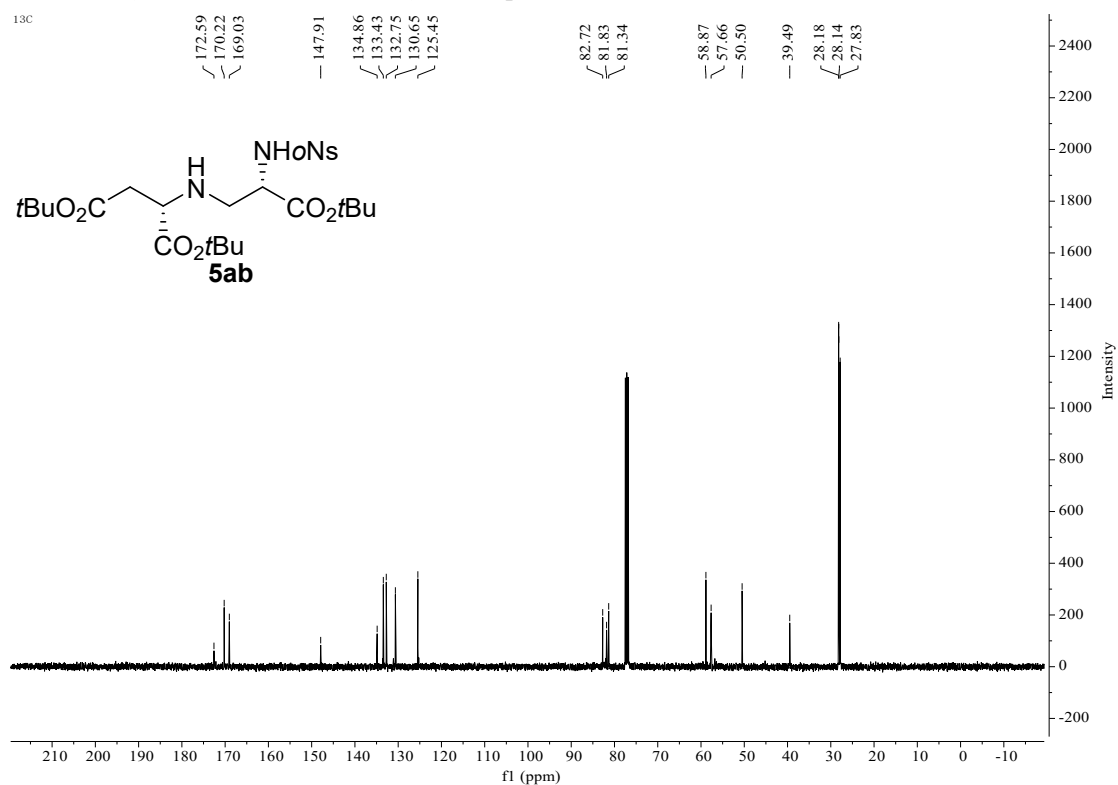

<sup>1</sup>H NMR (400 MHz, Chloroform-*d*) of compound **5ac**

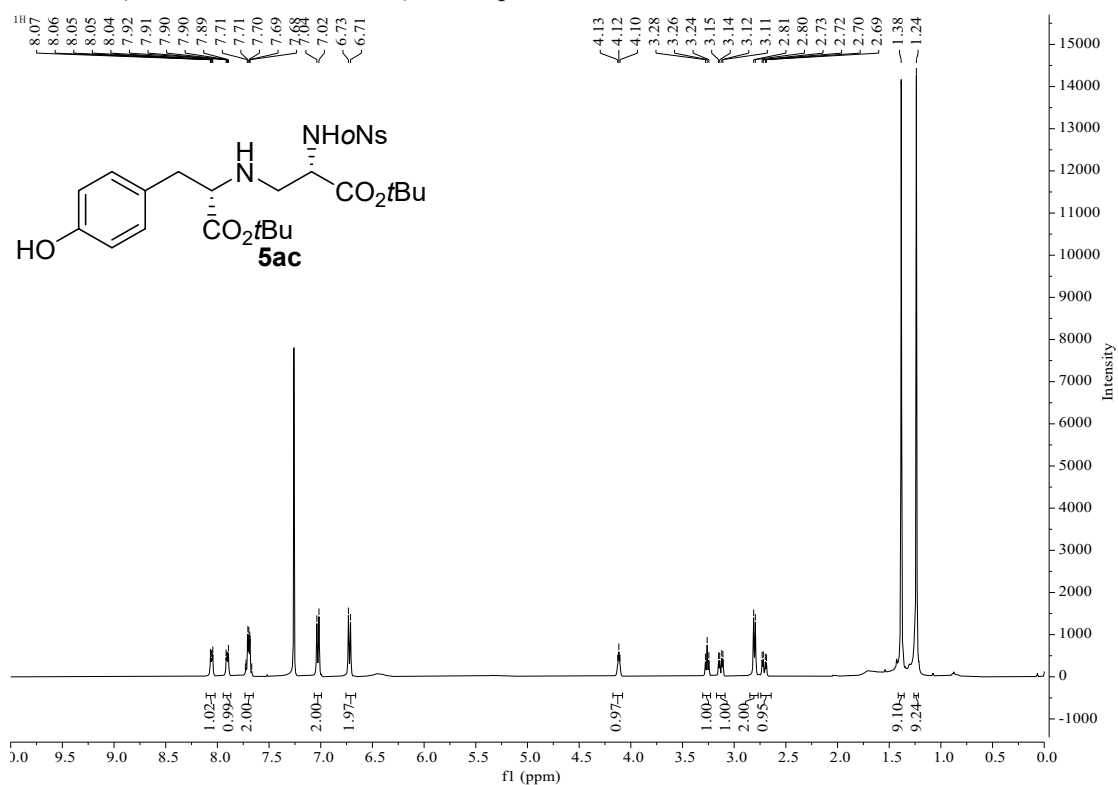

<sup>13</sup>C NMR (101 MHz, Chloroform-*d*) of compound **5ac**

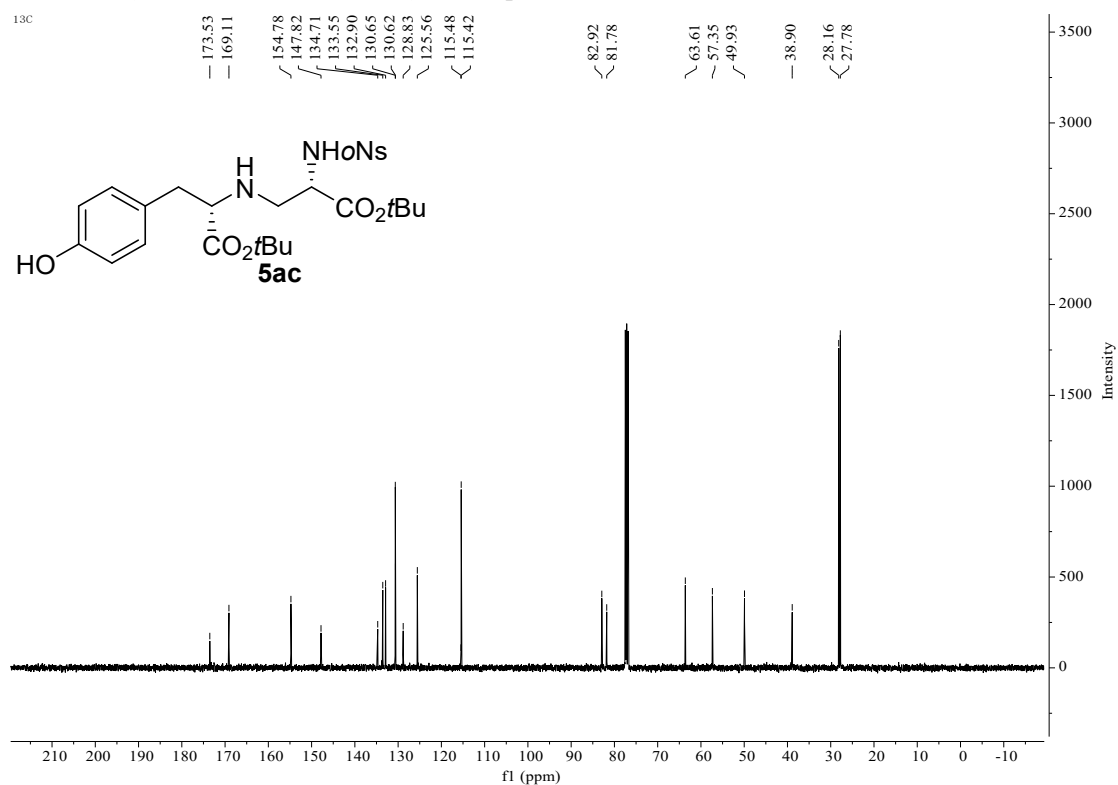

<sup>1</sup>H NMR (400 MHz, Chloroform-*d*) of compound **5ad**

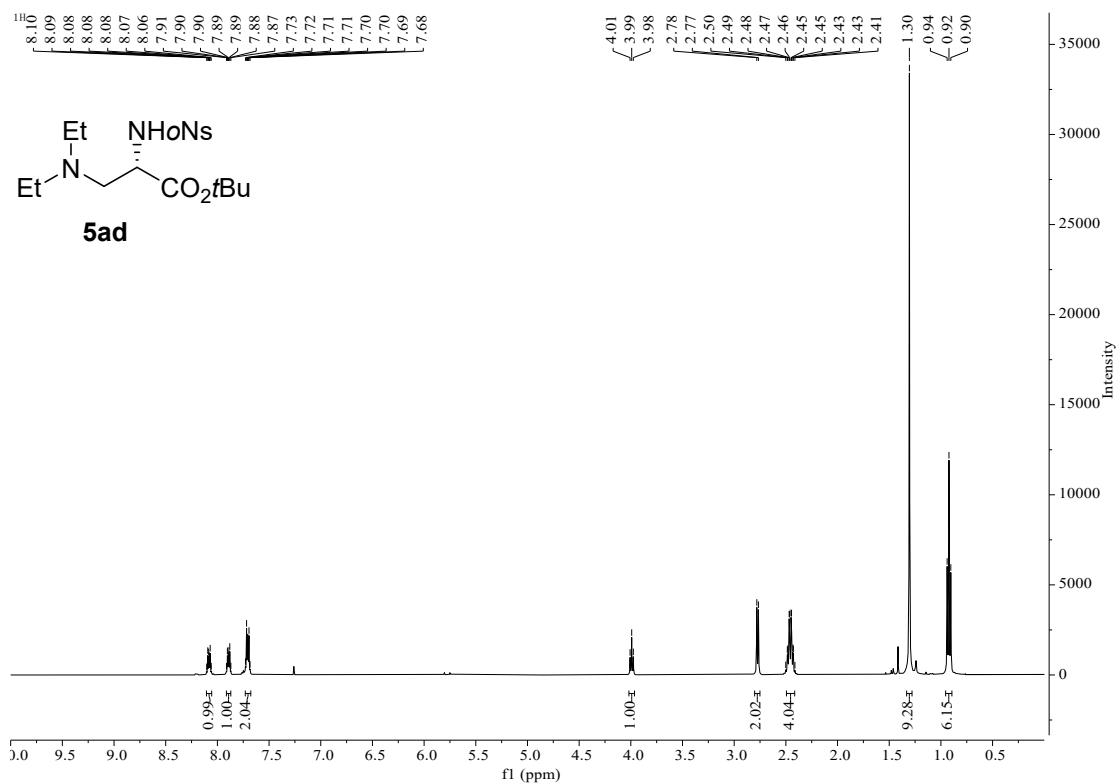

<sup>13</sup>C NMR (101 MHz, Chloroform-*d*) of compound **5ad**

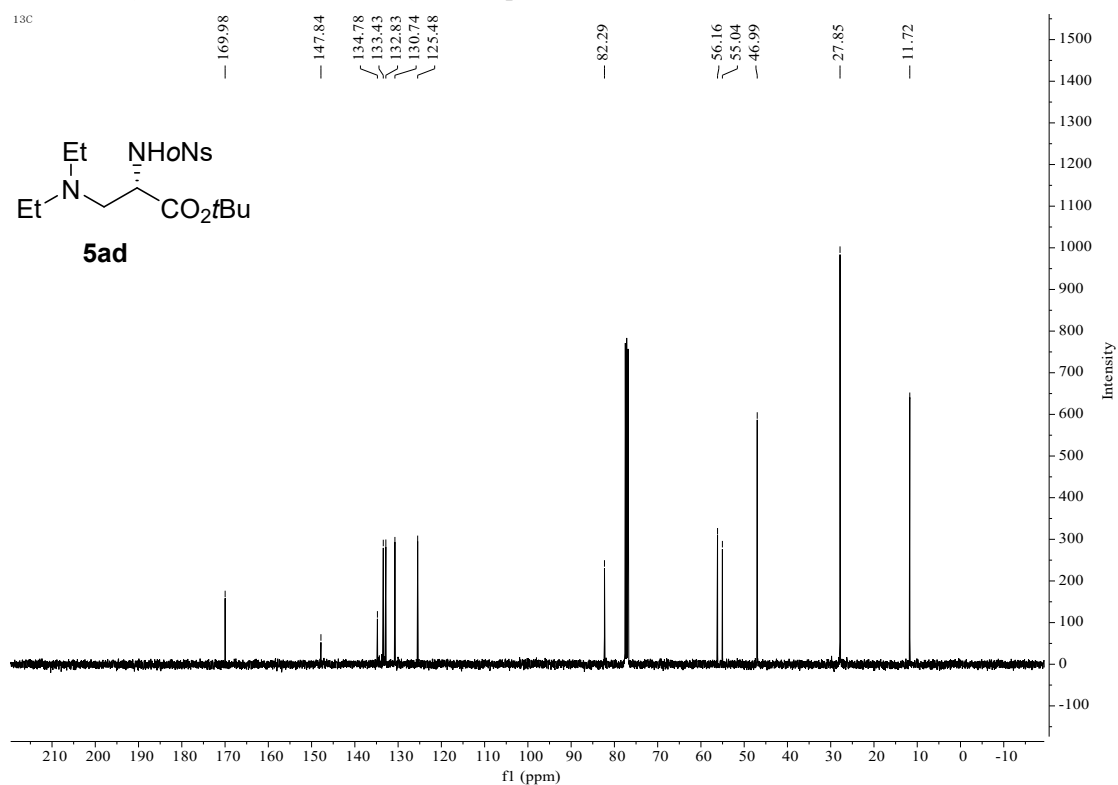

<sup>1</sup>H NMR (400 MHz, Chloroform-*d*) of compound **3ca**

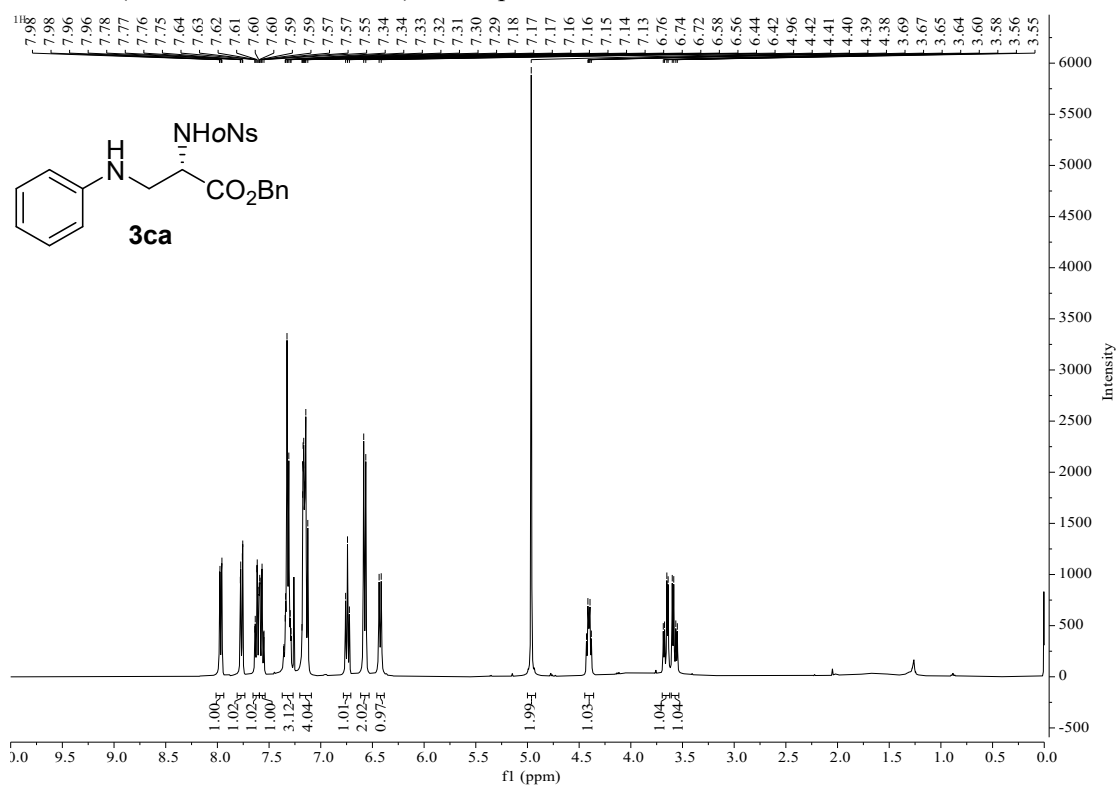

<sup>13</sup>C NMR (101 MHz, Chloroform-*d*) of compound **3ca**

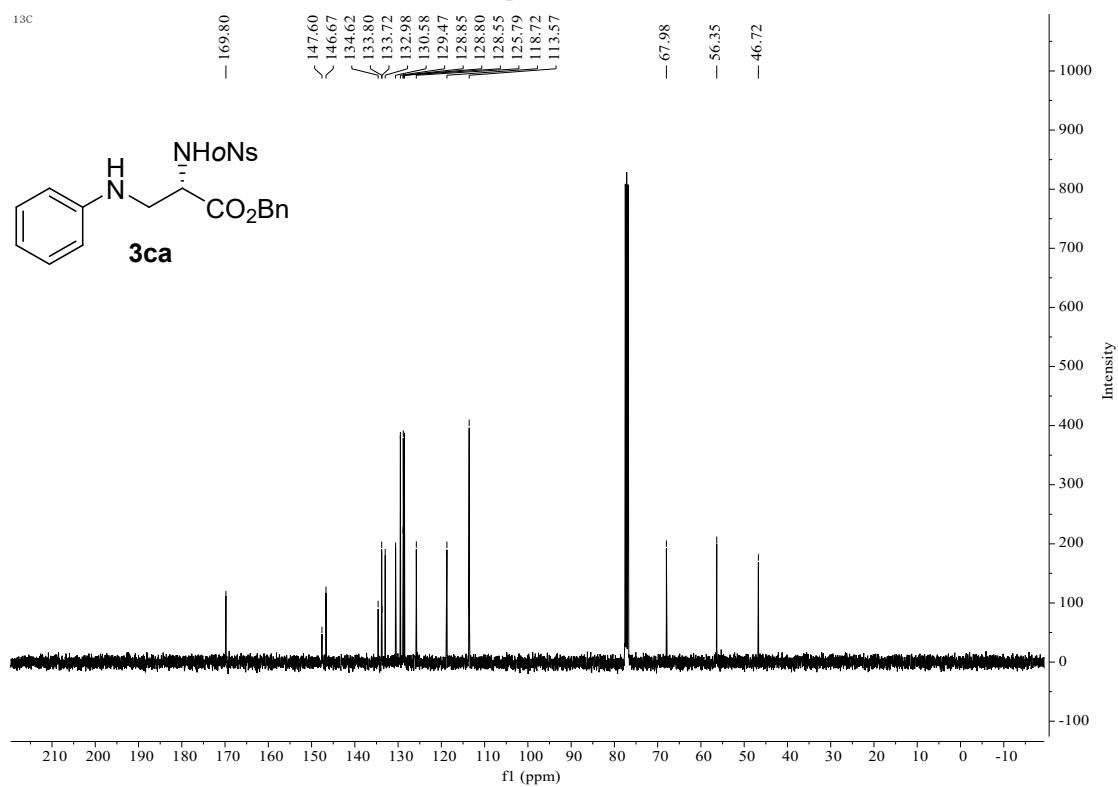

<sup>1</sup>H NMR (400 MHz, Chloroform-*d*) of compound 7

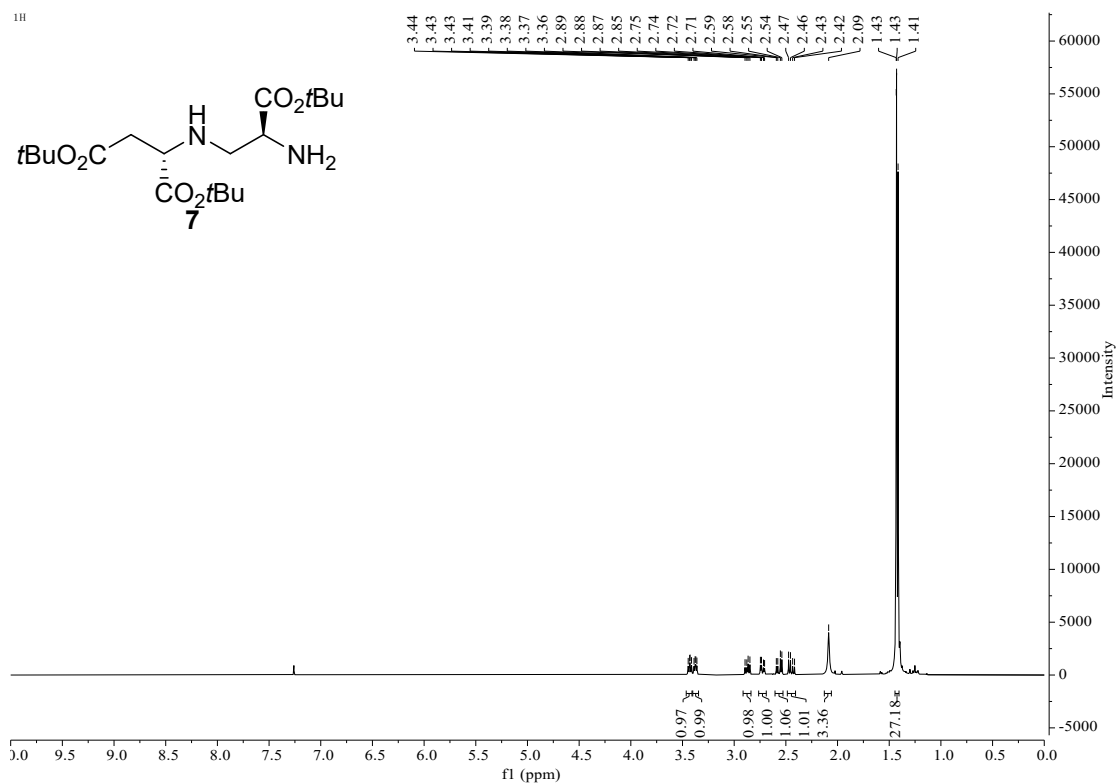

<sup>13</sup>C NMR (101 MHz, Chloroform-*d*) of compound 7

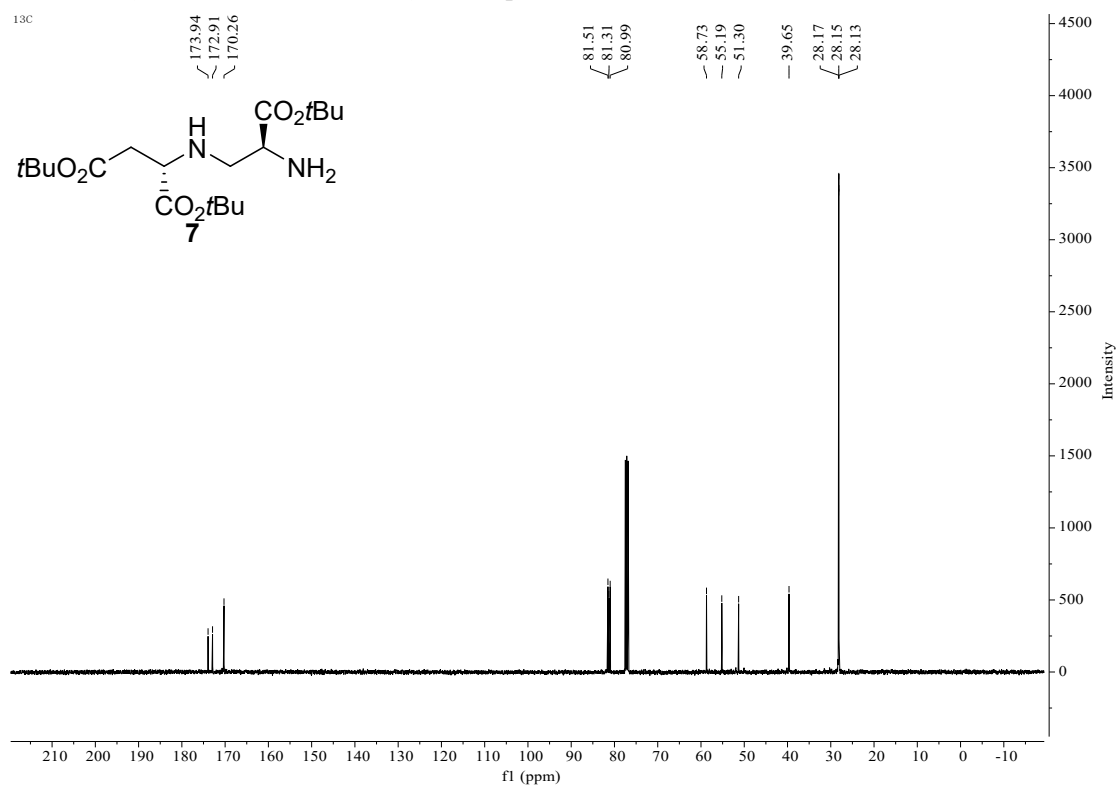

<sup>1</sup>H NMR (400 MHz, Chloroform-*d*) of compound **8**

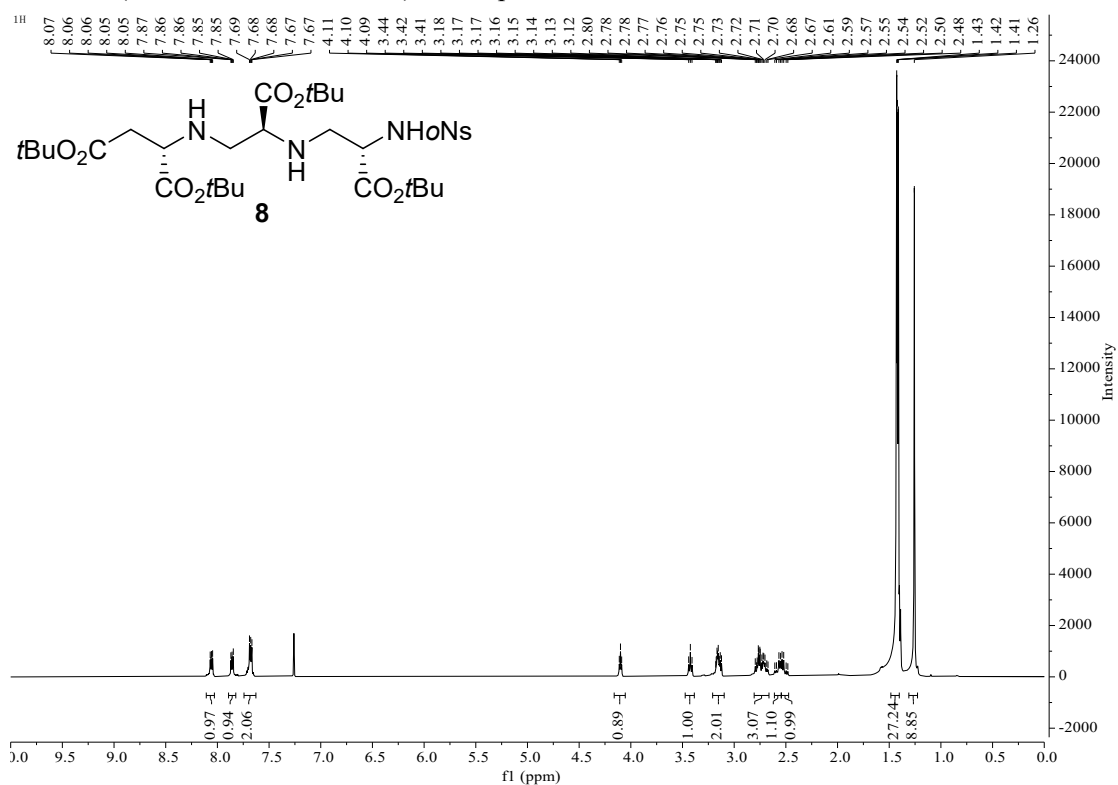

<sup>13</sup>C NMR (101 MHz, Chloroform-*d*) of compound **8**

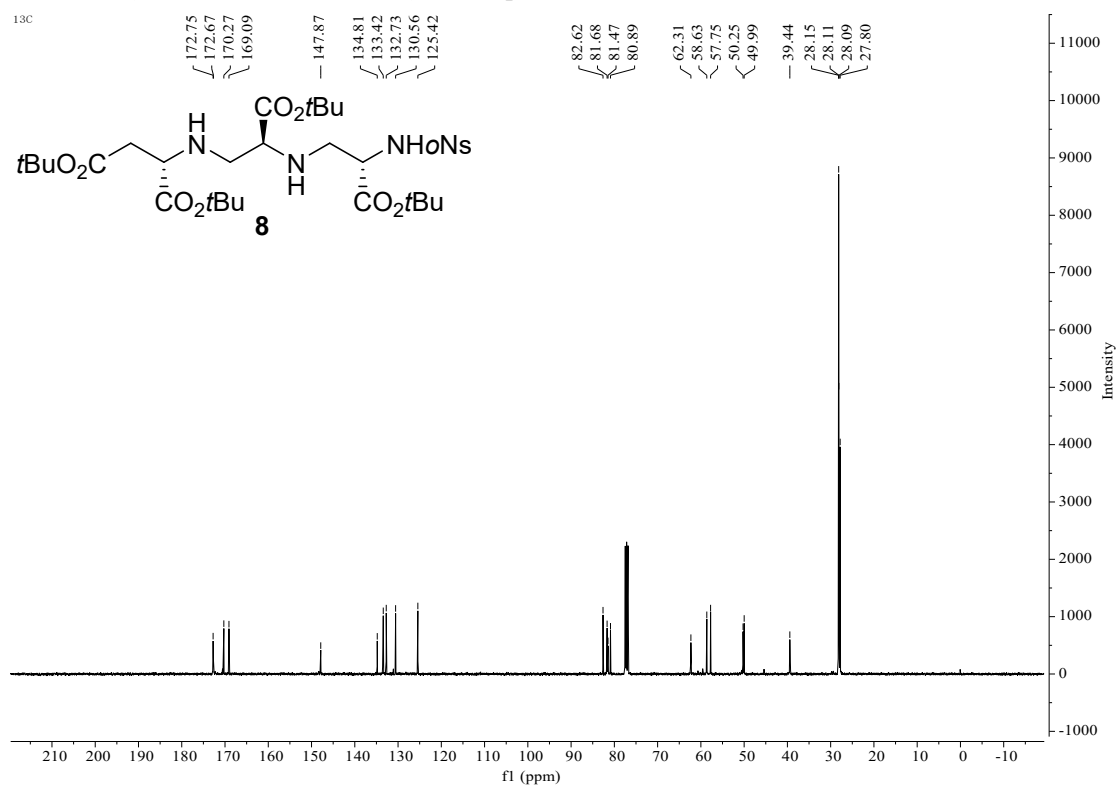



<sup>1</sup>H NMR (400 MHz, Chloroform-*d*) of compound **9**

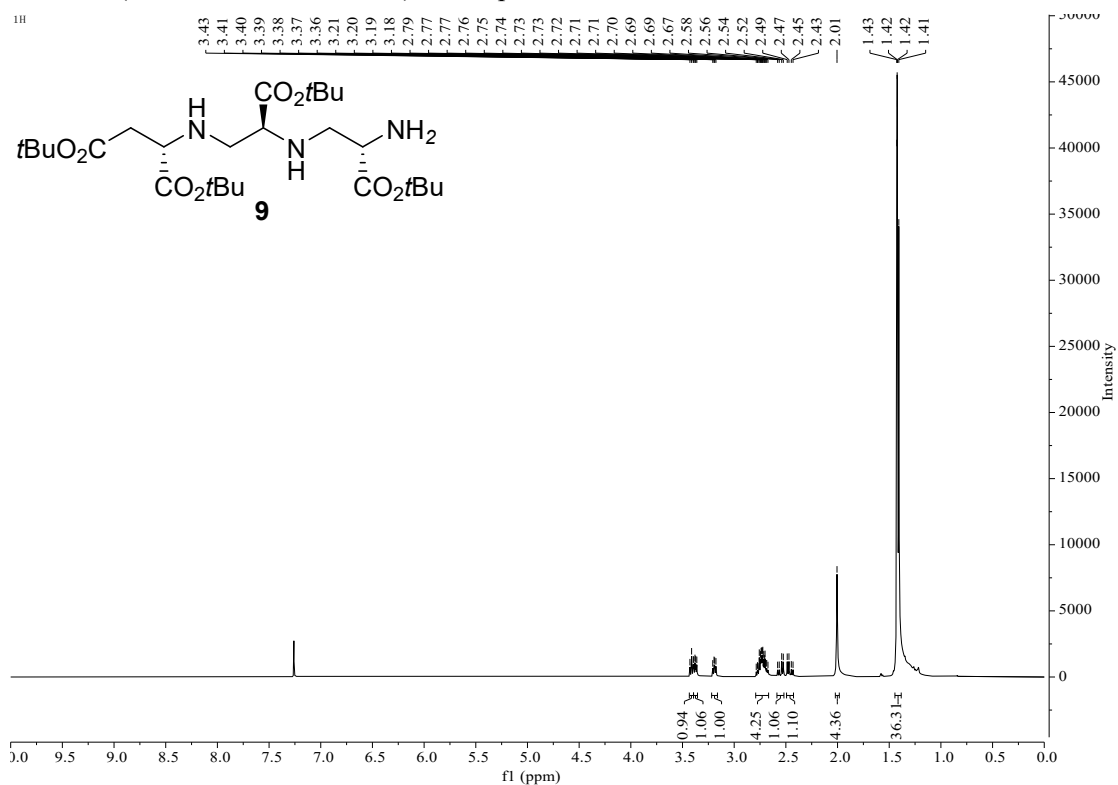

<sup>13</sup>C NMR (101 MHz, Chloroform-*d*) of compound **9**

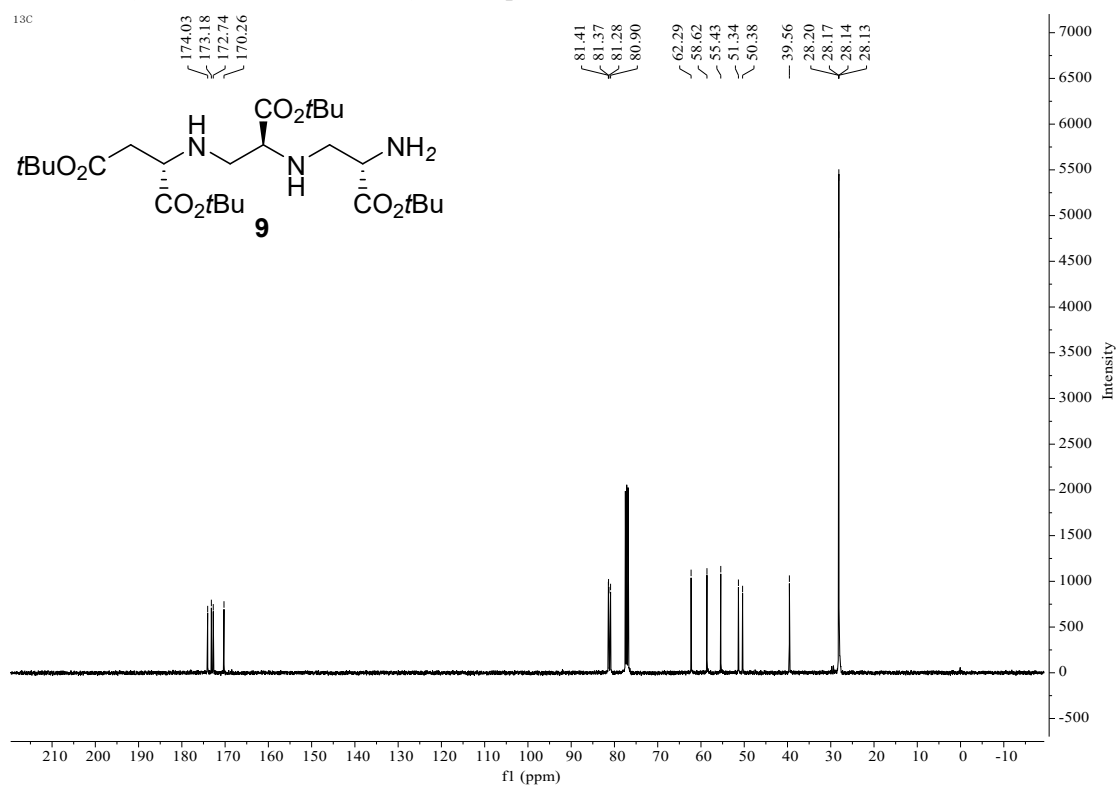

### <sup>1</sup>H NMR (600 MHz, Deuterium Oxide) of compound AMA

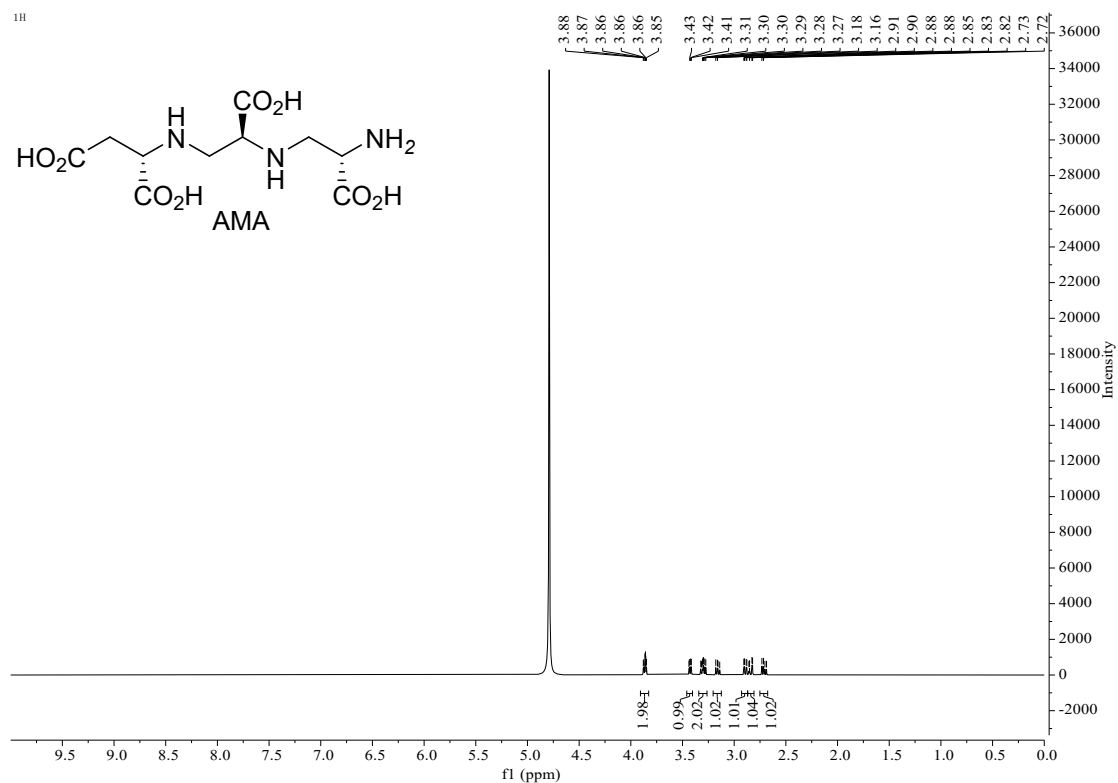

### <sup>13</sup>C NMR (151 MHz, Deuterium Oxide) of compound AMA

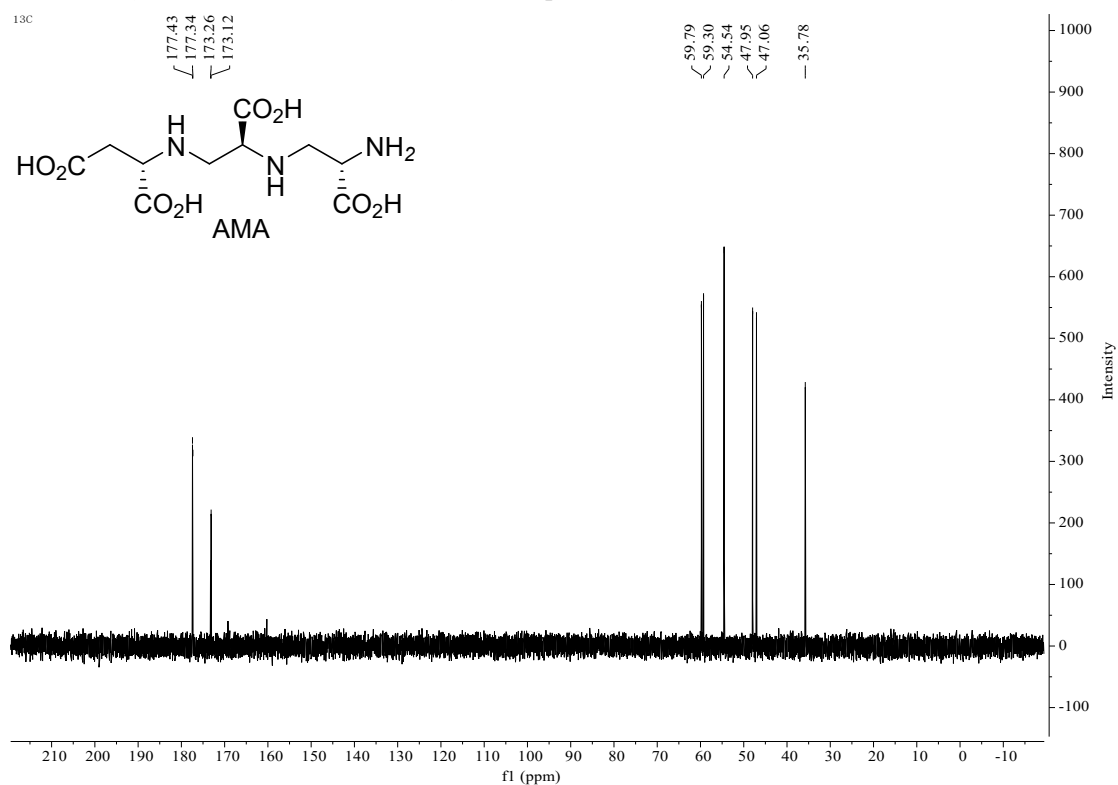

Supplement: d3ob00722g1.pdf [file d3ob00722g1.pdf]
